# Supplementary material for: Real-time estimation of the effective reproduction number of SARS-CoV-2 in Aotearoa New Zealand
Source: PeerJ. 2022 Oct 17;10:e14119. doi: 10.7717/peerj.14119 (PMC9583856; doi:10.7717/peerj.14119)
Supplement: Supplemental Information 3 [file peerj-10-14119-s003.xlsx]

## Sheet: Main results
date	variable	strat	type	median	mean	sd	lower_90	lower_50	lower_20	upper_20	upper_50	upper_90
2021-08-17	R	NA	estimate	2.25931	2.36796	0.929129	1.07607	1.65248	2.0148	2.52291	2.94507	4.03546
2021-08-18	R	NA	estimate	1.94792	1.98229	0.619263	1.04077	1.50995	1.77194	2.12381	2.40921	3.05025
2021-08-19	R	NA	estimate	1.67036	1.65972	0.396725	1.00598	1.36633	1.55044	1.77218	1.95067	2.29985
2021-08-20	R	NA	estimate	1.41452	1.39481	0.241355	0.968663	1.23076	1.35326	1.47622	1.56491	1.7666
2021-08-21	R	NA	estimate	1.19216	1.18112	0.14046	0.929355	1.09554	1.15804	1.22449	1.27369	1.39702
2021-08-22	R	NA	estimate	1.01276	1.01165	0.0901417	0.864184	0.95065	0.989291	1.03491	1.07143	1.15909
2021-08-23	R	NA	estimate	0.88393	0.879466	0.0841745	0.731613	0.827522	0.864065	0.905388	0.937486	1.00987
2021-08-24	R	NA	estimate	0.79127	0.778184	0.0959118	0.603674	0.716378	0.764512	0.814777	0.848792	0.91548
2021-08-25	R	NA	estimate	0.714567	0.702324	0.106994	0.513494	0.626201	0.679875	0.745196	0.786775	0.855884
2021-08-26	R	NA	estimate	0.652716	0.647442	0.113203	0.456528	0.563774	0.617318	0.689799	0.737219	0.818616
2021-08-27	R	NA	estimate	0.610473	0.610109	0.114503	0.423045	0.523918	0.57547	0.645949	0.698629	0.793576
2021-08-28	R	NA	estimate	0.58463	0.5878	0.11156	0.411435	0.503415	0.550893	0.617039	0.671121	0.775749
2021-08-29	R	NA	estimate	0.573317	0.578737	0.105001	0.417304	0.498782	0.544016	0.600713	0.653989	0.763221
2021-08-30	R	NA	estimate	0.573831	0.581689	0.0954138	0.440775	0.510443	0.549011	0.598604	0.645114	0.756695
2021-08-31	R	NA	estimate	0.587622	0.595762	0.083692	0.470307	0.535539	0.567205	0.608849	0.647836	0.752977
2021-09-01	R	NA	estimate	0.614497	0.620134	0.0717439	0.51307	0.56881	0.597409	0.632444	0.663685	0.755413
2021-09-02	R	NA	estimate	0.649188	0.653789	0.0634932	0.556097	0.608919	0.634564	0.666438	0.694971	0.767218
2021-09-03	R	NA	estimate	0.690849	0.695252	0.064125	0.599166	0.650407	0.675998	0.70532	0.734297	0.806876
2021-09-04	R	NA	estimate	0.733702	0.742428	0.0746258	0.639287	0.691682	0.71651	0.750862	0.78128	0.881012
2021-09-05	R	NA	estimate	0.778019	0.792626	0.0899056	0.677466	0.730766	0.758245	0.795852	0.834819	0.970744
2021-09-06	R	NA	estimate	0.821623	0.842826	0.104073	0.713448	0.769438	0.800766	0.844105	0.893353	1.05202
2021-09-07	R	NA	estimate	0.866361	0.89014	0.113247	0.750351	0.80795	0.840773	0.893175	0.950956	1.11224
2021-09-08	R	NA	estimate	0.908823	0.932301	0.115846	0.783728	0.844445	0.88106	0.94216	1.00004	1.15602
2021-09-09	R	NA	estimate	0.949285	0.96801	0.112374	0.817768	0.879984	0.92018	0.983658	1.03851	1.17603
2021-09-10	R	NA	estimate	0.984644	0.997015	0.104898	0.851522	0.914381	0.955444	1.01524	1.06631	1.18742
2021-09-11	R	NA	estimate	1.00986	1.01995	0.0962737	0.882531	0.944508	0.984033	1.03915	1.08402	1.1924
2021-09-12	R	NA	estimate	1.02988	1.03802	0.0891961	0.907518	0.969867	1.00724	1.05562	1.09729	1.1973
2021-09-13	R	NA	estimate	1.04839	1.05272	0.08522	0.926836	0.990593	1.02602	1.07144	1.10669	1.20453
2021-09-14	R	NA	estimate	1.06321	1.06552	0.0842198	0.935125	1.00923	1.04133	1.08538	1.12025	1.20802
2021-09-15	R	NA	estimate	1.07707	1.07777	0.0848376	0.935307	1.02583	1.05717	1.09824	1.13407	1.21493
2021-09-16	R	NA	estimate	1.0916	1.09051	0.0855241	0.939583	1.04049	1.07199	1.11248	1.14791	1.22413
2021-09-17	R	NA	estimate	1.10724	1.10446	0.0852945	0.95275	1.05448	1.08629	1.12856	1.16076	1.23718
2021-09-18	R	NA	estimate	1.12476	1.12002	0.0839682	0.970626	1.06897	1.1043	1.14407	1.17579	1.25113
2021-09-19	R	NA	estimate	1.14109	1.13719	0.0820759	0.996605	1.08789	1.12049	1.16114	1.19305	1.26506
2021-09-20	R	NA	estimate	1.15822	1.15563	0.0805177	1.01764	1.10509	1.13944	1.17816	1.21029	1.28033
2021-09-21	R	NA	estimate	1.17709	1.17471	0.0800024	1.03729	1.12261	1.15798	1.19571	1.22784	1.29913
2021-09-22	R	NA	estimate	1.19457	1.19358	0.0805404	1.05942	1.14122	1.17588	1.21401	1.24411	1.32096
2021-09-23	R	NA	estimate	1.21035	1.21133	0.0814353	1.07952	1.16033	1.19216	1.22966	1.26118	1.34476
2021-09-24	R	NA	estimate	1.22446	1.22714	0.0817968	1.09762	1.17475	1.20629	1.24382	1.27624	1.36438
2021-09-25	R	NA	estimate	1.23654	1.24044	0.081088	1.1143	1.18965	1.21959	1.25518	1.2874	1.38065
2021-09-26	R	NA	estimate	1.24675	1.25092	0.0793339	1.12973	1.19948	1.2298	1.26519	1.29623	1.3901
2021-09-27	R	NA	estimate	1.25484	1.25862	0.0769924	1.14205	1.20738	1.23765	1.27221	1.30341	1.39176
2021-09-28	R	NA	estimate	1.2608	1.26381	0.0746651	1.1488	1.2152	1.24356	1.27773	1.30744	1.39291
2021-09-29	R	NA	estimate	1.26481	1.26694	0.0728193	1.15192	1.22073	1.24873	1.28134	1.30922	1.39006
2021-09-30	R	NA	estimate	1.26756	1.26851	0.0716309	1.15234	1.22374	1.25127	1.28314	1.31121	1.38707
2021-10-01	R	NA	estimate	1.26866	1.26903	0.0709894	1.15379	1.22506	1.25218	1.28398	1.31019	1.38521
2021-10-02	R	NA	estimate	1.26964	1.26889	0.0706253	1.15344	1.22461	1.25357	1.28398	1.30996	1.38484
2021-10-03	R	NA	estimate	1.26892	1.26836	0.0702722	1.15498	1.2252	1.25182	1.28346	1.31166	1.38475
2021-10-04	R	NA	estimate	1.26772	1.26755	0.0697752	1.15613	1.22472	1.25053	1.28345	1.30941	1.38341
2021-10-05	R	NA	estimate	1.26653	1.26639	0.0691136	1.15382	1.22408	1.24944	1.28309	1.30819	1.38329
2021-10-06	R	NA	estimate	1.2644	1.26471	0.0683551	1.15477	1.22242	1.24846	1.27998	1.30528	1.3792
2021-10-07	R	NA	estimate	1.26078	1.26225	0.0675828	1.1545	1.21928	1.24573	1.2765	1.30107	1.37593
2021-10-08	R	NA	estimate	1.25564	1.25873	0.0668476	1.15409	1.2163	1.24089	1.27207	1.29937	1.37107
2021-10-09	R	NA	estimate	1.24957	1.25392	0.0661786	1.15425	1.21185	1.23528	1.26718	1.29384	1.36429
2021-10-10	R	NA	estimate	1.24402	1.2477	0.0656166	1.15119	1.20462	1.22902	1.25968	1.28582	1.36101
2021-10-11	R	NA	estimate	1.23672	1.24006	0.0651995	1.14288	1.19651	1.22176	1.25189	1.27759	1.35312
2021-10-12	R	NA	estimate	1.22943	1.23115	0.0648947	1.13072	1.18858	1.21435	1.24335	1.26932	1.34255
2021-10-13	R	NA	estimate	1.22047	1.22122	0.064567	1.11875	1.18044	1.20489	1.23534	1.25946	1.33096
2021-10-14	R	NA	estimate	1.20967	1.21063	0.0640387	1.10804	1.17016	1.19501	1.22456	1.24912	1.31902
2021-10-15	R	NA	estimate	1.19887	1.19981	0.0631988	1.09907	1.16	1.18557	1.2134	1.23824	1.30714
2021-10-16	R	NA	estimate	1.1888	1.18917	0.0620769	1.08854	1.15079	1.17462	1.20366	1.22638	1.2914
2021-10-17	R	NA	estimate	1.17945	1.17911	0.0608392	1.07996	1.14108	1.16515	1.19338	1.21626	1.27886
2021-10-18	R	NA	estimate	1.17003	1.16993	0.0597137	1.07229	1.13237	1.15617	1.1846	1.2076	1.26416
2021-10-19	R	NA	estimate	1.16288	1.16183	0.0588881	1.06369	1.12456	1.14889	1.17626	1.1997	1.25467
2021-10-20	R	NA	estimate	1.1556	1.15489	0.0584344	1.0578	1.11777	1.14204	1.17019	1.1916	1.2482
2021-10-21	R	NA	estimate	1.14956	1.14904	0.0582978	1.05188	1.11253	1.13614	1.16376	1.18596	1.24299
2021-10-22	R	NA	estimate	1.14423	1.14414	0.058351	1.04736	1.1079	1.13137	1.15763	1.18182	1.23816
2021-10-23	R	NA	estimate	1.14019	1.13997	0.0584733	1.04245	1.10288	1.12641	1.15334	1.17632	1.23488
2021-10-24	R	NA	estimate	1.13622	1.13627	0.0586013	1.03966	1.09846	1.12213	1.14949	1.17231	1.23312
2021-10-25	R	NA	estimate	1.13268	1.13278	0.058716	1.03917	1.09598	1.11845	1.14609	1.16871	1.2316
2021-10-26	R	NA	estimate	1.12974	1.12927	0.0587846	1.03514	1.09158	1.11478	1.14235	1.16431	1.22858
2021-10-27	R	NA	estimate	1.12443	1.12556	0.0587211	1.03074	1.08792	1.11094	1.13828	1.16101	1.22715
2021-10-28	R	NA	estimate	1.12038	1.12151	0.0584176	1.02753	1.08466	1.10584	1.13393	1.1569	1.22011
2021-10-29	R	NA	estimate	1.11575	1.11707	0.0578273	1.02385	1.0804	1.10195	1.12916	1.15251	1.21479
2021-10-30	R	NA	estimate	1.11138	1.11226	0.0570283	1.01984	1.07697	1.09845	1.12428	1.14703	1.20839
2021-10-31	R	NA	estimate	1.10632	1.10714	0.0562126	1.01621	1.07234	1.09379	1.12023	1.14241	1.2
2021-11-01	R	NA	estimate	1.10129	1.10179	0.0556022	1.01188	1.0665	1.08926	1.11509	1.13797	1.19214
2021-11-02	R	NA	estimate	1.09631	1.09627	0.0553405	1.0067	1.06128	1.08253	1.10954	1.13205	1.18605
2021-11-03	R	NA	estimate	1.09048	1.0906	0.0554255	1.00042	1.05502	1.07777	1.10329	1.12654	1.18117
2021-11-04	R	NA	estimate	1.08395	1.08477	0.0557242	0.993552	1.04932	1.07152	1.09765	1.12046	1.17546
2021-11-05	R	NA	estimate	1.07802	1.07865	0.0560577	0.985683	1.04335	1.06466	1.09124	1.11323	1.17098
2021-11-06	R	NA	estimate	1.07058	1.07209	0.0562983	0.980909	1.03639	1.05756	1.08376	1.10636	1.16494
2021-11-07	R	NA	estimate	1.06244	1.06486	0.0564224	0.974184	1.02968	1.05033	1.07524	1.09921	1.15996
2021-11-08	R	NA	estimate	1.05326	1.0567	0.0564919	0.967932	1.02105	1.04124	1.066	1.09122	1.15316
2021-11-09	R	NA	estimate	1.0434	1.04732	0.0565754	0.958946	1.01088	1.03086	1.05745	1.08187	1.14488
2021-11-10	R	NA	estimate	1.03258	1.03649	0.0566639	0.951375	0.999679	1.01979	1.04603	1.07009	1.13593
2021-11-11	R	NA	estimate	1.02018	1.024	0.056648	0.940544	0.986572	1.00695	1.03277	1.05746	1.12266
2021-11-12	R	NA	estimate	1.00515	1.00976	0.0563848	0.92581	0.972315	0.992047	1.01933	1.04294	1.10507
2021-11-13	R	NA	estimate	0.989933	0.993807	0.0558044	0.912403	0.955902	0.976797	1.0036	1.02726	1.08908
2021-11-14	R	NA	estimate	0.973325	0.976324	0.0549749	0.892738	0.938659	0.960069	0.986043	1.00888	1.07091
2021-11-15	R	NA	estimate	0.954755	0.957646	0.054073	0.874248	0.922661	0.942264	0.967398	0.989857	1.05326
2021-11-16	R	NA	estimate	0.935895	0.938236	0.0532801	0.85546	0.903235	0.924252	0.948082	0.969677	1.03138
2021-11-17	R	NA	estimate	0.917088	0.918644	0.052686	0.834198	0.884463	0.906311	0.92874	0.950751	1.00923
2021-11-18	R	NA	estimate	0.899153	0.899472	0.0522691	0.813	0.866686	0.887821	0.910398	0.931143	0.98751
2021-11-19	R	NA	estimate	0.880874	0.881322	0.0519529	0.795193	0.850147	0.869449	0.893297	0.914	0.967494
2021-11-20	R	NA	estimate	0.86573	0.864758	0.0516743	0.775808	0.833627	0.853776	0.876805	0.897855	0.949714
2021-11-21	R	NA	estimate	0.851972	0.850269	0.0514151	0.761852	0.818083	0.840148	0.863731	0.883654	0.933498
2021-11-22	R	NA	estimate	0.84043	0.838236	0.0511919	0.750849	0.805656	0.828106	0.852273	0.872058	0.918851
2021-11-23	R	NA	estimate	0.831206	0.828909	0.0510296	0.740219	0.796016	0.819337	0.843191	0.863212	0.909682
2021-11-24	R	NA	estimate	0.825085	0.822393	0.0509389	0.735402	0.790216	0.811929	0.836609	0.856651	0.903155
2021-11-25	R	NA	estimate	0.821302	0.818641	0.0509106	0.733417	0.78669	0.807287	0.83262	0.852386	0.899497
2021-11-26	R	NA	estimate	0.819067	0.81746	0.0509233	0.73155	0.785171	0.807014	0.830892	0.85015	0.898492
2021-11-27	R	NA	estimate	0.819259	0.818527	0.0509579	0.733788	0.786405	0.807555	0.830866	0.85	0.901815
2021-11-28	R	NA	estimate	0.821418	0.821408	0.0510155	0.738059	0.789103	0.810132	0.832356	0.85142	0.907161
2021-11-29	R	NA	estimate	0.824064	0.825593	0.0511322	0.745446	0.792986	0.813335	0.835213	0.855491	0.911903
2021-11-30	R	NA	estimate	0.828408	0.830534	0.0513761	0.752611	0.797711	0.816606	0.839275	0.860048	0.919034
2021-12-01	R	NA	estimate	0.832241	0.835686	0.0518048	0.756713	0.802157	0.821661	0.844553	0.865905	0.926726
2021-12-02	R	NA	estimate	0.836649	0.840553	0.0523954	0.761128	0.806941	0.82548	0.849135	0.87117	0.933606
2021-12-03	R	NA	estimate	0.840443	0.844735	0.0530111	0.765341	0.810551	0.828849	0.851915	0.875466	0.938161
2021-12-04	R	NA	estimate	0.843225	0.847968	0.0534625	0.769242	0.813363	0.832142	0.855429	0.878789	0.942065
2021-12-05	R	NA	estimate	0.846358	0.850152	0.053633	0.772158	0.815039	0.834552	0.857938	0.881298	0.94423
2021-12-06	R	NA	estimate	0.848022	0.851353	0.0535668	0.771415	0.816184	0.836145	0.860025	0.88263	0.944592
2021-12-07	R	NA	estimate	0.849023	0.851782	0.0534444	0.76835	0.817193	0.836968	0.861694	0.882397	0.94533
2021-12-08	R	NA	estimate	0.85072	0.851752	0.053465	0.764734	0.817464	0.837608	0.863163	0.884619	0.944413
2021-12-09	R	NA	estimate	0.850983	0.851625	0.0537204	0.762634	0.817635	0.838447	0.863773	0.884937	0.943769
2021-12-10	R	NA	estimate	0.851915	0.851753	0.0541468	0.761952	0.8167	0.839145	0.864692	0.886121	0.942413
2021-12-11	R	NA	estimate	0.853172	0.852439	0.0545742	0.761773	0.817742	0.840289	0.866041	0.88753	0.940546
2021-12-12	R	NA	estimate	0.855324	0.853898	0.0548285	0.76268	0.818583	0.842392	0.868554	0.889405	0.939772
2021-12-13	R	NA	estimate	0.858238	0.856241	0.0548264	0.76348	0.821706	0.845507	0.871138	0.891439	0.941509
2021-12-14	R	NA	estimate	0.860511	0.859463	0.0546225	0.7675	0.825968	0.848596	0.872801	0.894724	0.94502
2021-12-15	R	NA	estimate	0.864226	0.863442	0.0543949	0.7692	0.830587	0.851595	0.877355	0.89795	0.952306
2021-12-16	R	NA	estimate	0.868746	0.867947	0.0543694	0.777251	0.834775	0.85523	0.881296	0.901697	0.957808
2021-12-17	R	NA	estimate	0.872229	0.872656	0.0547072	0.782836	0.83953	0.86032	0.88487	0.90629	0.963259
2021-12-18	R	NA	estimate	0.876148	0.877188	0.0554097	0.786693	0.84276	0.863988	0.889063	0.910578	0.970408
2021-12-19	R	NA	estimate	0.879984	0.881146	0.0563135	0.7893	0.845047	0.867871	0.8929	0.915608	0.976343
2021-12-20	R	NA	estimate	0.882254	0.884167	0.0571927	0.792095	0.847513	0.869697	0.896402	0.91894	0.980619
2021-12-21	R	NA	estimate	0.883821	0.885969	0.0578961	0.795659	0.847765	0.870261	0.899019	0.921593	0.985232
2021-12-22	R	NA	estimate	0.883592	0.886382	0.0584082	0.796292	0.847039	0.869852	0.89872	0.922299	0.986471
2021-12-23	R	NA	estimate	0.881613	0.885368	0.0588009	0.794946	0.845866	0.868583	0.896794	0.920902	0.989035
2021-12-24	R	NA	estimate	0.880076	0.883021	0.0591446	0.791487	0.84339	0.866594	0.893698	0.917784	0.986494
2021-12-25	R	NA	estimate	0.876532	0.879549	0.0594663	0.788221	0.840115	0.864223	0.890054	0.915103	0.981691
2021-12-26	R	NA	estimate	0.872807	0.875255	0.0597761	0.780922	0.835922	0.859896	0.886658	0.910637	0.977187
2021-12-27	R	NA	estimate	0.869376	0.870516	0.0601155	0.776589	0.830779	0.854941	0.883351	0.906232	0.970155
2021-12-28	R	NA	estimate	0.86511	0.865751	0.060574	0.770031	0.825759	0.850617	0.879786	0.902491	0.965241
2021-12-29	R	NA	estimate	0.860437	0.861396	0.0612557	0.764236	0.820502	0.845899	0.875316	0.900378	0.96005
2021-12-30	R	NA	estimate	0.858244	0.857883	0.0622191	0.756467	0.816303	0.841672	0.87325	0.89903	0.959479
2021-12-31	R	NA	estimate	0.855948	0.855615	0.0634332	0.750537	0.813379	0.840184	0.872034	0.896868	0.956222
2022-01-01	R	NA	estimate	0.855565	0.854955	0.0647807	0.748234	0.811717	0.839664	0.871898	0.897915	0.956494
2022-01-02	R	NA	estimate	0.857851	0.856222	0.0661081	0.74539	0.813109	0.841938	0.874983	0.900383	0.961103
2022-01-03	R	NA	estimate	0.862717	0.859693	0.0673081	0.746047	0.816109	0.845159	0.878392	0.904705	0.965312
2022-01-04	R	NA	estimate	0.869579	0.865613	0.0684274	0.750557	0.820857	0.851702	0.884472	0.91111	0.971387
2022-01-05	R	NA	estimate	0.875728	0.8742	0.0698078	0.756222	0.830538	0.85963	0.892452	0.920783	0.98426
2022-01-06	R	NA	estimate	0.886357	0.885664	0.0722614	0.765988	0.839978	0.869776	0.902918	0.933441	1.00112
2022-01-07	R	NA	estimate	0.900127	0.900214	0.0772016	0.773491	0.850078	0.881306	0.918244	0.949976	1.0273
2022-01-08	R	NA	estimate	0.91657	0.918067	0.0865416	0.778504	0.861482	0.895811	0.939024	0.974583	1.06271
2022-01-09	R	NA	estimate	0.93757	0.939463	0.102254	0.773171	0.873362	0.91149	0.963658	1.00677	1.11036
2022-01-10	R	NA	estimate based on partial data	0.961728	0.964662	0.125931	0.765823	0.879127	0.93116	0.994962	1.04775	1.17585
2022-01-11	R	NA	estimate based on partial data	0.989036	0.993942	0.158788	0.747018	0.88484	0.947231	1.03077	1.09576	1.26451
2022-01-12	R	NA	estimate based on partial data	1.01278	1.02759	0.202002	0.724866	0.885746	0.963931	1.06588	1.14882	1.39064
2022-01-13	R	NA	estimate based on partial data	1.03629	1.06591	0.256996	0.703993	0.884676	0.978968	1.09725	1.21272	1.54106
2022-01-14	R	NA	estimate based on partial data	1.06131	1.10914	0.325555	0.677577	0.881313	0.991048	1.13347	1.2778	1.72247
2022-01-15	R	NA	estimate based on partial data	1.08212	1.1575	0.409812	0.655799	0.876965	0.998002	1.17222	1.34663	1.92253
2022-01-16	R	NA	estimate based on partial data	1.10208	1.21114	0.512275	0.626658	0.872262	1.00516	1.20849	1.41912	2.16735
2022-01-17	R	NA	estimate based on partial data	1.12173	1.27016	0.635995	0.594584	0.863682	1.01197	1.24306	1.49594	2.46486
2022-01-18	R	NA	estimate based on partial data	1.13905	1.33462	0.784815	0.570083	0.854481	1.01262	1.27481	1.57108	2.75672
2021-08-17	growth_rate	NA	estimate	0.305231	0.31739	0.197778	0.0205141	0.166353	0.250247	0.360271	0.450166	0.659894
2021-08-18	growth_rate	NA	estimate	0.236016	0.236776	0.140386	0.0113799	0.131692	0.194527	0.274337	0.338082	0.468992
2021-08-19	growth_rate	NA	estimate	0.170447	0.164791	0.0953217	0.00164686	0.0963153	0.142317	0.195073	0.236331	0.311537
2021-08-20	growth_rate	NA	estimate	0.108164	0.101857	0.0611003	-0.00853405	0.0616117	0.0927984	0.123685	0.145321	0.193072
2021-08-21	growth_rate	NA	estimate	0.0514995	0.0479982	0.0371646	-0.019797	0.0259743	0.0426786	0.0597568	0.0728977	0.103423
2021-08-22	growth_rate	NA	estimate	0.00352262	0.00288248	0.0247636	-0.0379879	-0.0136676	-0.0029742	0.00961354	0.0194778	0.0427196
2021-08-23	growth_rate	NA	estimate	-0.0325164	-0.0340854	0.0241654	-0.0769702	-0.0486616	-0.0382268	-0.0264709	-0.0174111	0.00268637
2021-08-24	growth_rate	NA	estimate	-0.059279	-0.0636468	0.0286547	-0.11597	-0.0815033	-0.0673275	-0.0524719	-0.042497	-0.0233908
2021-08-25	growth_rate	NA	estimate	-0.0821151	-0.0865798	0.0329193	-0.145532	-0.109423	-0.0929041	-0.0730429	-0.060623	-0.0406863
2021-08-26	growth_rate	NA	estimate	-0.101195	-0.103619	0.0355632	-0.165029	-0.129427	-0.112363	-0.0896335	-0.0752129	-0.0512194
2021-08-27	growth_rate	NA	estimate	-0.114613	-0.115408	0.0364598	-0.177056	-0.142239	-0.125385	-0.102933	-0.0869303	-0.0583828
2021-08-28	growth_rate	NA	estimate	-0.122563	-0.122483	0.0357634	-0.180678	-0.149177	-0.133299	-0.112039	-0.0954419	-0.0642319
2021-08-29	growth_rate	NA	estimate	-0.12639	-0.125281	0.0336802	-0.178178	-0.150472	-0.135742	-0.117358	-0.100745	-0.0675569
2021-08-30	growth_rate	NA	estimate	-0.125878	-0.124169	0.0304577	-0.170501	-0.146561	-0.133868	-0.118146	-0.103522	-0.0697612
2021-08-31	growth_rate	NA	estimate	-0.121559	-0.119491	0.026475	-0.15985	-0.138459	-0.128102	-0.114769	-0.102764	-0.0705271
2021-09-01	growth_rate	NA	estimate	-0.112985	-0.111619	0.0224327	-0.145928	-0.127458	-0.118489	-0.107375	-0.0979226	-0.0703574
2021-09-02	growth_rate	NA	estimate	-0.102126	-0.10101	0.0195863	-0.131622	-0.114685	-0.106841	-0.0968913	-0.0883735	-0.0661542
2021-09-03	growth_rate	NA	estimate	-0.0894077	-0.0882494	0.01942	-0.1177	-0.101735	-0.0939644	-0.0849859	-0.076281	-0.0544874
2021-09-04	growth_rate	NA	estimate	-0.0765831	-0.0740645	0.0220769	-0.105251	-0.0890597	-0.0816582	-0.0712731	-0.062366	-0.0336331
2021-09-05	growth_rate	NA	estimate	-0.0632663	-0.0592865	0.0260089	-0.0933385	-0.0773393	-0.0690916	-0.0577962	-0.0464843	-0.00808554
2021-09-06	growth_rate	NA	estimate	-0.0503273	-0.0447687	0.0295619	-0.0824011	-0.0657692	-0.0567428	-0.0439941	-0.0299232	0.0140836
2021-09-07	growth_rate	NA	estimate	-0.0373815	-0.031274	0.0317219	-0.0714166	-0.054287	-0.0448748	-0.0298739	-0.0135377	0.0302924
2021-09-08	growth_rate	NA	estimate	-0.0255015	-0.0193679	0.0321188	-0.0618448	-0.0437198	-0.033265	-0.0160667	1.06071e-05	0.042027
2021-09-09	growth_rate	NA	estimate	-0.0140796	-0.00935208	0.0309201	-0.0516108	-0.0334307	-0.0222145	-0.00452627	0.0105301	0.0473862
2021-09-10	growth_rate	NA	estimate	-0.00422849	-0.00125735	0.0286901	-0.0417203	-0.0237838	-0.0123483	0.00418917	0.0180952	0.0501046
2021-09-11	growth_rate	NA	estimate	0.00271512	0.00511121	0.0261995	-0.0328861	-0.0153908	-0.00444015	0.0106314	0.0228741	0.0515077
2021-09-12	growth_rate	NA	estimate	0.0080862	0.0100991	0.0241833	-0.0257599	-0.00832076	0.00196309	0.0150965	0.0262933	0.0526729
2021-09-13	growth_rate	NA	estimate	0.0132004	0.0141224	0.0230636	-0.0203121	-0.00258938	0.00717582	0.019512	0.0289543	0.0540664
2021-09-14	growth_rate	NA	estimate	0.0172062	0.0175999	0.0227834	-0.0180484	0.00256348	0.0113213	0.023183	0.0325341	0.0557705
2021-09-15	growth_rate	NA	estimate	0.0210322	0.0209041	0.0229366	-0.0179245	0.00706495	0.0156315	0.0267688	0.036189	0.0574348
2021-09-16	growth_rate	NA	estimate	0.0249651	0.0243303	0.0230772	-0.016774	0.0110454	0.0195917	0.0304433	0.0399789	0.0600399
2021-09-17	growth_rate	NA	estimate	0.0290704	0.0280787	0.0229364	-0.013023	0.0148573	0.0234048	0.0348382	0.0434129	0.0632393
2021-09-18	growth_rate	NA	estimate	0.0337036	0.0322469	0.0224797	-0.00804413	0.0187194	0.028255	0.0389233	0.0472097	0.066773
2021-09-19	growth_rate	NA	estimate	0.0380261	0.0368294	0.021866	-0.000940779	0.0236953	0.0326096	0.0433854	0.0517282	0.0707106
2021-09-20	growth_rate	NA	estimate	0.0427404	0.0417264	0.0213421	0.00485585	0.0284974	0.0375311	0.0479297	0.0563138	0.0744227
2021-09-21	growth_rate	NA	estimate	0.0476208	0.0467621	0.0210916	0.0101367	0.0332279	0.0425386	0.0525952	0.0609956	0.0797375
2021-09-22	growth_rate	NA	estimate	0.0521335	0.0517142	0.0211139	0.0160729	0.038015	0.0471385	0.0571726	0.0651563	0.0850295
2021-09-23	growth_rate	NA	estimate	0.0562943	0.0563508	0.0212341	0.021579	0.0431202	0.0513531	0.0613001	0.0695262	0.0904284
2021-09-24	growth_rate	NA	estimate	0.0599548	0.0604681	0.0212328	0.0265151	0.046995	0.0552715	0.0649895	0.0733135	0.0955207
2021-09-25	growth_rate	NA	estimate	0.0631129	0.0639217	0.0209796	0.0309486	0.0509119	0.0584673	0.0679982	0.076315	0.100116
2021-09-26	growth_rate	NA	estimate	0.0657714	0.0666432	0.0204817	0.0351147	0.0533029	0.0613087	0.0704157	0.0785865	0.102482
2021-09-27	growth_rate	NA	estimate	0.0679202	0.0686409	0.0198526	0.0381224	0.0555214	0.063255	0.0722189	0.080076	0.103247
2021-09-28	growth_rate	NA	estimate	0.0695354	0.0699873	0.0192411	0.0402064	0.0575039	0.0649292	0.0736768	0.0813857	0.102829
2021-09-29	growth_rate	NA	estimate	0.0702452	0.0707974	0.0187609	0.0409999	0.0590284	0.0661584	0.0746416	0.0819649	0.102328
2021-09-30	growth_rate	NA	estimate	0.0710694	0.0712045	0.0184513	0.0411338	0.0596377	0.0668405	0.0751281	0.0821121	0.101387
2021-10-01	growth_rate	NA	estimate	0.0714791	0.0713371	0.0182798	0.0410761	0.0600797	0.067205	0.0753538	0.0821566	0.101318
2021-10-02	growth_rate	NA	estimate	0.0717247	0.0713004	0.0181775	0.0415606	0.0600759	0.0675304	0.0752324	0.0819816	0.100994
2021-10-03	growth_rate	NA	estimate	0.0714109	0.0711635	0.0180794	0.0418756	0.0602346	0.0671839	0.0752234	0.082348	0.100808
2021-10-04	growth_rate	NA	estimate	0.0711228	0.0709535	0.0179486	0.0420731	0.0600178	0.0667327	0.0750894	0.0820431	0.1005
2021-10-05	growth_rate	NA	estimate	0.0706283	0.0706565	0.0177795	0.0412388	0.0597187	0.0665295	0.0748059	0.0816683	0.100473
2021-10-06	growth_rate	NA	estimate	0.0700008	0.0702258	0.017586	0.0416614	0.059438	0.0661726	0.074197	0.0808463	0.0997371
2021-10-07	growth_rate	NA	estimate	0.0693705	0.0695942	0.0173862	0.0416225	0.0585232	0.0653121	0.0733966	0.0798797	0.0982707
2021-10-08	growth_rate	NA	estimate	0.0678858	0.06869	0.0171954	0.0415051	0.0578127	0.0642903	0.0721976	0.0791618	0.0970559
2021-10-09	growth_rate	NA	estimate	0.0664372	0.0674535	0.017029	0.0416179	0.0565203	0.0628081	0.0709227	0.0777687	0.0957367
2021-10-10	growth_rate	NA	estimate	0.0649492	0.0658495	0.0169047	0.0408928	0.0547139	0.0609848	0.0691037	0.075841	0.0943529
2021-10-11	growth_rate	NA	estimate	0.0630122	0.0638762	0.0168335	0.0385183	0.0526227	0.059155	0.0671195	0.0739093	0.0925105
2021-10-12	growth_rate	NA	estimate	0.0611971	0.0615673	0.0168033	0.0353378	0.0506188	0.057177	0.0650108	0.0714363	0.0904417
2021-10-13	growth_rate	NA	estimate	0.0588828	0.0589897	0.0167735	0.0322289	0.0485034	0.0547815	0.0626494	0.0690879	0.0874877
2021-10-14	growth_rate	NA	estimate	0.0561072	0.0562358	0.0166924	0.0296628	0.0458405	0.0522184	0.0599381	0.0662888	0.084342
2021-10-15	growth_rate	NA	estimate	0.0533609	0.0534133	0.0165261	0.0267333	0.0432332	0.049751	0.0570509	0.0636546	0.0813791
2021-10-16	growth_rate	NA	estimate	0.0506948	0.0506332	0.0162783	0.0241009	0.0406802	0.0469216	0.0545435	0.0605877	0.0776172
2021-10-17	growth_rate	NA	estimate	0.0481161	0.0479972	0.0159907	0.021712	0.0380978	0.0444398	0.0518712	0.0577925	0.0742239
2021-10-18	growth_rate	NA	estimate	0.0457731	0.0455864	0.0157234	0.0197313	0.0358927	0.0420259	0.0495613	0.0555452	0.0703829
2021-10-19	growth_rate	NA	estimate	0.0438874	0.0434536	0.0155277	0.0174722	0.0336663	0.0401335	0.047368	0.0534923	0.0675599
2021-10-20	growth_rate	NA	estimate	0.0418376	0.0416191	0.0154255	0.0157097	0.0317961	0.0383113	0.0457636	0.051415	0.065864
2021-10-21	growth_rate	NA	estimate	0.0403657	0.0400717	0.0154049	0.0141318	0.0303921	0.0367775	0.0439444	0.0500369	0.0645688
2021-10-22	growth_rate	NA	estimate	0.038843	0.0387735	0.0154341	0.0128887	0.0292967	0.0354835	0.0424593	0.0488278	0.0635649
2021-10-23	growth_rate	NA	estimate	0.0378631	0.0376673	0.0154828	0.0116289	0.0279906	0.0342657	0.0413748	0.04736	0.0625702
2021-10-24	growth_rate	NA	estimate	0.0367793	0.036686	0.0155337	0.0109242	0.0268253	0.0329477	0.0403623	0.0463933	0.0623174
2021-10-25	growth_rate	NA	estimate	0.0357815	0.0357607	0.0155805	0.0107267	0.0260244	0.0320531	0.0393366	0.045418	0.0618271
2021-10-26	growth_rate	NA	estimate	0.0349871	0.0348295	0.0156136	0.0097025	0.0248685	0.0310048	0.0384416	0.0442596	0.0610112
2021-10-27	growth_rate	NA	estimate	0.03368	0.0338427	0.0156122	0.0083974	0.0239766	0.0301295	0.0373041	0.0433912	0.0603755
2021-10-28	growth_rate	NA	estimate	0.0325154	0.0327675	0.015551	0.00754415	0.0230884	0.0285987	0.0362113	0.0422604	0.0589722
2021-10-29	growth_rate	NA	estimate	0.0313618	0.0315896	0.0154192	0.00648102	0.0218356	0.0277132	0.0350891	0.04116	0.0572696
2021-10-30	growth_rate	NA	estimate	0.0302891	0.0303112	0.0152353	0.00547728	0.0209601	0.0267404	0.0336153	0.0397542	0.0557609
2021-10-31	growth_rate	NA	estimate	0.028895	0.0289468	0.0150464	0.00446032	0.0196309	0.025511	0.0325573	0.0384331	0.0536669
2021-11-01	growth_rate	NA	estimate	0.0275745	0.0275164	0.0149084	0.00327315	0.0181291	0.0241576	0.0311307	0.0370789	0.0513449
2021-11-02	growth_rate	NA	estimate	0.0261509	0.026037	0.0148579	0.00177726	0.0167331	0.022528	0.0295302	0.0357573	0.0499544
2021-11-03	growth_rate	NA	estimate	0.024642	0.0245157	0.0148951	0.000115145	0.0149966	0.021228	0.0280162	0.0342143	0.0488062
2021-11-04	growth_rate	NA	estimate	0.0229337	0.0229439	0.0149864	-0.00176959	0.0135098	0.0194796	0.0265322	0.032598	0.0473775
2021-11-05	growth_rate	NA	estimate	0.0212952	0.0212948	0.0150871	-0.00389462	0.0118643	0.0176377	0.0247323	0.0306244	0.0461024
2021-11-06	growth_rate	NA	estimate	0.0191883	0.0195229	0.0151667	-0.00524068	0.0099376	0.015721	0.0227525	0.0289585	0.044462
2021-11-07	growth_rate	NA	estimate	0.0170711	0.017567	0.0152213	-0.00700516	0.00814112	0.0137519	0.0204568	0.0269117	0.0429152
2021-11-08	growth_rate	NA	estimate	0.0145748	0.015355	0.0152685	-0.00884367	0.0057912	0.0112598	0.0180322	0.0248439	0.0413556
2021-11-09	growth_rate	NA	estimate	0.0118638	0.0128105	0.0153255	-0.0113757	0.00299387	0.0084303	0.0155711	0.0222473	0.039085
2021-11-10	growth_rate	NA	estimate	0.00888718	0.00986224	0.0153893	-0.0135092	-8.78586e-05	0.00547155	0.0125683	0.0190764	0.0365265
2021-11-11	growth_rate	NA	estimate	0.00554547	0.00645383	0.0154319	-0.0164079	-0.00367698	0.00190596	0.0089633	0.0155842	0.0328729
2021-11-12	growth_rate	NA	estimate	0.00142604	0.00255474	0.015417	-0.0204307	-0.00761415	-0.0022041	0.00531881	0.0117779	0.0285345
2021-11-13	growth_rate	NA	estimate	-0.00278199	-0.00183092	0.0153267	-0.0244019	-0.012219	-0.00643566	0.000988677	0.00749188	0.024164
2021-11-14	growth_rate	NA	estimate	-0.00735908	-0.00665874	0.015178	-0.0300764	-0.016919	-0.0110278	-0.00384698	0.00243783	0.0191573
2021-11-15	growth_rate	NA	estimate	-0.0125478	-0.0118432	0.0150159	-0.0350483	-0.0216213	-0.0159866	-0.00901559	-0.00277097	0.0144599
2021-11-16	growth_rate	NA	estimate	-0.0177281	-0.017262	0.0148881	-0.0407338	-0.0269552	-0.0210975	-0.0143845	-0.00841195	0.00862249
2021-11-17	growth_rate	NA	estimate	-0.0230411	-0.0227644	0.0148185	-0.0468929	-0.0322898	-0.0261715	-0.0197969	-0.0136226	0.00253028
2021-11-18	growth_rate	NA	estimate	-0.0282053	-0.0281822	0.0148003	-0.052614	-0.0373168	-0.0314743	-0.0250677	-0.019148	-0.0034202
2021-11-19	growth_rate	NA	estimate	-0.0333945	-0.0333419	0.0148082	-0.0581769	-0.0421607	-0.0366555	-0.0297745	-0.0240097	-0.00905075
2021-11-20	growth_rate	NA	estimate	-0.0376599	-0.0380774	0.0148188	-0.0635261	-0.0469711	-0.0410682	-0.0344571	-0.0285569	-0.01397
2021-11-21	growth_rate	NA	estimate	-0.0416628	-0.0422412	0.0148217	-0.0678393	-0.0514565	-0.0450747	-0.038331	-0.0326292	-0.0184944
2021-11-22	growth_rate	NA	estimate	-0.0449153	-0.0457149	0.014819	-0.0710545	-0.0551223	-0.0485503	-0.041472	-0.0359088	-0.0224377
2021-11-23	growth_rate	NA	estimate	-0.0477116	-0.0484175	0.0148177	-0.0742962	-0.0578423	-0.0510589	-0.0441742	-0.0385627	-0.0252035
2021-11-24	growth_rate	NA	estimate	-0.0492511	-0.0503114	0.0148219	-0.0757529	-0.0595865	-0.053152	-0.0461169	-0.0403881	-0.0271137
2021-11-25	growth_rate	NA	estimate	-0.0506266	-0.0514044	0.0148294	-0.076491	-0.0604636	-0.0545933	-0.0473391	-0.041513	-0.0280505
2021-11-26	growth_rate	NA	estimate	-0.0511365	-0.0517494	0.0148338	-0.0770138	-0.0610906	-0.0546747	-0.0477975	-0.0421126	-0.0280895
2021-11-27	growth_rate	NA	estimate	-0.0510937	-0.0514398	0.0148304	-0.0764145	-0.0606884	-0.0544289	-0.0477599	-0.0420567	-0.0276133
2021-11-28	growth_rate	NA	estimate	-0.0504273	-0.0506022	0.0148229	-0.0747832	-0.0600296	-0.0537366	-0.0474031	-0.0417345	-0.025851
2021-11-29	growth_rate	NA	estimate	-0.0497901	-0.0493868	0.014827	-0.0729337	-0.0588907	-0.0529085	-0.0463691	-0.0406332	-0.024528
2021-11-30	growth_rate	NA	estimate	-0.0483876	-0.0479545	0.014867	-0.0710016	-0.0573919	-0.0518409	-0.0452553	-0.0393659	-0.0226368
2021-12-01	growth_rate	NA	estimate	-0.0473682	-0.0464646	0.0149605	-0.0695554	-0.0560868	-0.0504826	-0.0438349	-0.0375583	-0.0204975
2021-12-02	growth_rate	NA	estimate	-0.0460307	-0.0450602	0.0151001	-0.0678073	-0.0546171	-0.0493697	-0.0424751	-0.036175	-0.0185122
2021-12-03	growth_rate	NA	estimate	-0.0449832	-0.0438555	0.0152481	-0.0665687	-0.0536294	-0.0483079	-0.0416268	-0.0349446	-0.0171773
2021-12-04	growth_rate	NA	estimate	-0.0441079	-0.0429245	0.0153552	-0.0654697	-0.0528269	-0.0475074	-0.0407095	-0.0339748	-0.0159804
2021-12-05	growth_rate	NA	estimate	-0.0433278	-0.042295	0.0153931	-0.0649892	-0.0522989	-0.0467612	-0.0399019	-0.0332882	-0.0154063
2021-12-06	growth_rate	NA	estimate	-0.0428374	-0.0419476	0.0153754	-0.065359	-0.0519151	-0.0463823	-0.0392262	-0.0329244	-0.0153488
2021-12-07	growth_rate	NA	estimate	-0.0423248	-0.0418223	0.015351	-0.066237	-0.051788	-0.0459144	-0.0388506	-0.0328479	-0.0152323
2021-12-08	growth_rate	NA	estimate	-0.0420093	-0.0418298	0.0153725	-0.0671577	-0.0516087	-0.0457932	-0.038451	-0.0323142	-0.0155492
2021-12-09	growth_rate	NA	estimate	-0.0419843	-0.0418671	0.0154618	-0.0677633	-0.0516967	-0.045372	-0.0382332	-0.0321278	-0.0154262
2021-12-10	growth_rate	NA	estimate	-0.0416172	-0.0418319	0.0155965	-0.0679526	-0.0518339	-0.0452937	-0.0381175	-0.0317734	-0.0160357
2021-12-11	growth_rate	NA	estimate	-0.0413306	-0.0416366	0.0157244	-0.0678458	-0.0516005	-0.0450336	-0.03762	-0.0314942	-0.0165313
2021-12-12	growth_rate	NA	estimate	-0.0406505	-0.0412181	0.0157932	-0.0676077	-0.0511601	-0.0443808	-0.036897	-0.0309854	-0.0168367
2021-12-13	growth_rate	NA	estimate	-0.0398264	-0.0405443	0.0157789	-0.0676116	-0.0503156	-0.0435377	-0.036225	-0.0303429	-0.0162533
2021-12-14	growth_rate	NA	estimate	-0.0391491	-0.0396176	0.0156997	-0.0665891	-0.0490945	-0.042696	-0.0356544	-0.0293405	-0.0151875
2021-12-15	growth_rate	NA	estimate	-0.0381132	-0.0384747	0.0156101	-0.0656794	-0.0478795	-0.041761	-0.0343661	-0.0285919	-0.0131934
2021-12-16	growth_rate	NA	estimate	-0.0368341	-0.0371837	0.0155779	-0.0635693	-0.0465151	-0.0407211	-0.0332856	-0.0274934	-0.0116701
2021-12-17	growth_rate	NA	estimate	-0.035829	-0.035838	0.0156499	-0.0618261	-0.0453608	-0.0393431	-0.0322859	-0.0261652	-0.0100914
2021-12-18	growth_rate	NA	estimate	-0.0347696	-0.0345465	0.0158254	-0.0605617	-0.0442571	-0.038202	-0.0310741	-0.0248597	-0.00825982
2021-12-19	growth_rate	NA	estimate	-0.0336614	-0.0334213	0.0160581	-0.0599373	-0.0436041	-0.0371346	-0.0298897	-0.023584	-0.0064766
2021-12-20	growth_rate	NA	estimate	-0.0329173	-0.0325642	0.016286	-0.05884	-0.0429542	-0.0366418	-0.0288573	-0.0224983	-0.00533286
2021-12-21	growth_rate	NA	estimate	-0.0325906	-0.0320544	0.0164681	-0.0578077	-0.0429333	-0.0364042	-0.0281861	-0.0217891	-0.00407651
2021-12-22	growth_rate	NA	estimate	-0.0324565	-0.0319389	0.0166007	-0.0580173	-0.0431218	-0.0365658	-0.0283244	-0.021686	-0.00376489
2021-12-23	growth_rate	NA	estimate	-0.0331402	-0.0322288	0.0167058	-0.0585444	-0.0434073	-0.0369443	-0.0288238	-0.021985	-0.0030245
2021-12-24	growth_rate	NA	estimate	-0.0335769	-0.0328985	0.0168066	-0.0592539	-0.0441172	-0.0373999	-0.029676	-0.0228725	-0.00373842
2021-12-25	growth_rate	NA	estimate	-0.0346181	-0.0338897	0.0169141	-0.0602673	-0.0450622	-0.0381389	-0.0308309	-0.0235932	-0.00501236
2021-12-26	growth_rate	NA	estimate	-0.0355976	-0.0351168	0.0170307	-0.0620987	-0.0462171	-0.0393852	-0.0317413	-0.0248046	-0.00631968
2021-12-27	growth_rate	NA	estimate	-0.0365942	-0.0364736	0.0171638	-0.063623	-0.0476755	-0.0407046	-0.0327041	-0.0261496	-0.00821405
2021-12-28	growth_rate	NA	estimate	-0.0378182	-0.0378409	0.0173322	-0.0654862	-0.0492635	-0.0419922	-0.0337737	-0.0272465	-0.00969381
2021-12-29	growth_rate	NA	estimate	-0.0391839	-0.0390938	0.0175603	-0.067112	-0.0507352	-0.0434707	-0.034984	-0.027917	-0.0110131
2021-12-30	growth_rate	NA	estimate	-0.0397966	-0.0401086	0.0178629	-0.0695834	-0.0518531	-0.0446874	-0.0356068	-0.0282071	-0.0111798
2021-12-31	growth_rate	NA	estimate	-0.0405091	-0.0407682	0.0182319	-0.0710654	-0.0528243	-0.0451297	-0.0359031	-0.0288232	-0.0120929
2022-01-01	growth_rate	NA	estimate	-0.0405129	-0.0409668	0.0186341	-0.0720016	-0.0532095	-0.045262	-0.0360373	-0.0284517	-0.0121094
2022-01-02	growth_rate	NA	estimate	-0.0400042	-0.0406109	0.0190233	-0.0728733	-0.0530362	-0.0444448	-0.0350267	-0.0278162	-0.010937
2022-01-03	growth_rate	NA	estimate	-0.0385301	-0.0396208	0.0193628	-0.0729592	-0.0519885	-0.0435082	-0.0340419	-0.0265301	-0.00959971
2022-01-04	growth_rate	NA	estimate	-0.0366044	-0.0379288	0.019658	-0.0712344	-0.0505166	-0.041671	-0.0323368	-0.0247776	-0.00792904
2022-01-05	growth_rate	NA	estimate	-0.0349205	-0.0354784	0.0200003	-0.0698052	-0.0478177	-0.0393306	-0.0299261	-0.0220863	-0.00439669
2022-01-06	growth_rate	NA	estimate	-0.0318013	-0.0322222	0.0206187	-0.0667369	-0.0451555	-0.0366358	-0.0272012	-0.0185448	0.000311292
2022-01-07	growth_rate	NA	estimate	-0.0279049	-0.0281201	0.0219161	-0.0645447	-0.0422489	-0.0332447	-0.0227151	-0.0138693	0.00757289
2022-01-08	growth_rate	NA	estimate	-0.0231939	-0.0231388	0.0244292	-0.0631087	-0.038888	-0.0291567	-0.0168533	-0.00703277	0.016912
2022-01-09	growth_rate	NA	estimate	-0.0173018	-0.017251	0.0286842	-0.0648504	-0.0355258	-0.0245367	-0.00996597	0.00184014	0.0298879
2022-01-10	growth_rate	NA	estimate based on partial data	-0.0105823	-0.0104361	0.0350535	-0.0669115	-0.0338665	-0.0190635	-0.00137898	0.0130054	0.0472592
2022-01-11	growth_rate	NA	estimate based on partial data	-0.00301159	-0.00268244	0.0437444	-0.0724118	-0.0320836	-0.0146235	0.00835632	0.0261921	0.0700137
2022-01-12	growth_rate	NA	estimate based on partial data	0.00353832	0.00601004	0.0548842	-0.0791717	-0.0320296	-0.0100465	0.0179925	0.0402683	0.102048
2022-01-13	growth_rate	NA	estimate based on partial data	0.00999232	0.0156254	0.0685878	-0.0852765	-0.0323582	-0.00575916	0.0264825	0.0570024	0.138407
2022-01-14	growth_rate	NA	estimate based on partial data	0.0167984	0.0261279	0.0849776	-0.0935005	-0.0330024	-0.00249975	0.0361128	0.0736699	0.182325
2022-01-15	growth_rate	NA	estimate based on partial data	0.022336	0.0374593	0.104175	-0.100503	-0.0343106	-0.000547355	0.0462878	0.091834	0.23036
2022-01-16	growth_rate	NA	estimate based on partial data	0.0278382	0.0495402	0.126294	-0.109118	-0.0360005	0.00143372	0.0559176	0.109362	0.283057
2022-01-17	growth_rate	NA	estimate based on partial data	0.0331588	0.0622759	0.151446	-0.118943	-0.0383084	0.00326593	0.0649023	0.128184	0.347415
2022-01-18	growth_rate	NA	estimate based on partial data	0.0378985	0.075565	0.179755	-0.126745	-0.0410758	0.00348162	0.0735488	0.145744	0.405712
2021-08-17	doubling_time	NA	estimate	2.2709	2.1839	NA	33.7888	4.16671	2.76985	1.92396	1.53976	1.05039
2021-08-18	doubling_time	NA	estimate	2.93687	2.92744	NA	60.9095	5.26339	3.56324	2.52663	2.05024	1.47795
2021-08-19	doubling_time	NA	estimate	4.06664	4.20621	NA	420.89	7.19665	4.87044	3.55326	2.93294	2.22493
2021-08-20	doubling_time	NA	estimate	6.40829	6.80509	NA	-81.2214	11.2503	7.46939	5.60411	4.76978	3.5901
2021-08-21	doubling_time	NA	estimate	13.4593	14.4411	NA	-35.0128	26.6859	16.2411	11.5995	9.50849	6.70209
2021-08-22	doubling_time	NA	estimate	196.77	240.469	NA	-18.2465	-50.7145	-233.054	72.1012	35.5866	16.2255
2021-08-23	doubling_time	NA	estimate	-21.3168	-20.3356	NA	-9.0054	-14.2442	-18.1325	-26.1853	-39.8106	258.024
2021-08-24	doubling_time	NA	estimate	-11.693	-10.8905	NA	-5.97693	-8.50452	-10.2952	-13.2099	-16.3105	-29.6334
2021-08-25	doubling_time	NA	estimate	-8.44117	-8.00587	NA	-4.76285	-6.33459	-7.46089	-9.48959	-11.4337	-17.0364
2021-08-26	doubling_time	NA	estimate	-6.84964	-6.68938	NA	-4.20014	-5.35551	-6.16884	-7.73313	-9.2158	-13.5329
2021-08-27	doubling_time	NA	estimate	-6.0477	-6.00606	NA	-3.91484	-4.87312	-5.52816	-6.73397	-7.97359	-11.8725
2021-08-28	doubling_time	NA	estimate	-5.65542	-5.65914	NA	-3.83636	-4.64647	-5.19992	-6.18664	-7.2625	-10.7913
2021-08-29	doubling_time	NA	estimate	-5.4842	-5.53276	NA	-3.89019	-4.6065	-5.10635	-5.90625	-6.88019	-10.2602
2021-08-30	doubling_time	NA	estimate	-5.50649	-5.58228	NA	-4.06536	-4.72942	-5.17786	-5.86688	-6.69564	-9.936
2021-08-31	doubling_time	NA	estimate	-5.70216	-5.80081	NA	-4.33623	-5.00617	-5.41089	-6.03951	-6.74504	-9.8281
2021-09-01	doubling_time	NA	estimate	-6.13486	-6.20994	NA	-4.74992	-5.43825	-5.84991	-6.45542	-7.07852	-9.8518
2021-09-02	doubling_time	NA	estimate	-6.78717	-6.86219	NA	-5.2662	-6.0439	-6.48766	-7.15387	-7.84338	-10.4778
2021-09-03	doubling_time	NA	estimate	-7.75266	-7.85441	NA	-5.88912	-6.81325	-7.3767	-8.15603	-9.08676	-12.7212
2021-09-04	doubling_time	NA	estimate	-9.05092	-9.35869	NA	-6.58565	-7.78295	-8.4884	-9.72523	-11.1142	-20.6091
2021-09-05	doubling_time	NA	estimate	-10.956	-11.6915	NA	-7.42617	-8.96241	-10.0323	-11.993	-14.9114	-85.7268
2021-09-06	doubling_time	NA	estimate	-13.7728	-15.4829	NA	-8.41187	-10.5391	-12.2156	-15.7555	-23.1642	49.2168
2021-09-07	doubling_time	NA	estimate	-18.5425	-22.1637	NA	-9.70569	-12.7682	-15.4462	-23.2024	-51.2011	22.8819
2021-09-08	doubling_time	NA	estimate	-27.1806	-35.7884	NA	-11.2079	-15.8543	-20.8371	-43.1417	65347.7	16.4929
2021-09-09	doubling_time	NA	estimate	-49.2307	-74.1169	NA	-13.4303	-20.7338	-31.2025	-153.139	65.825	14.6276
2021-09-10	doubling_time	NA	estimate	-163.923	-551.278	NA	-16.6142	-29.1436	-56.1328	165.462	38.3056	13.834
2021-09-11	doubling_time	NA	estimate	255.292	135.613	NA	-21.0772	-45.0364	-156.109	65.1981	30.3027	13.4572
2021-09-12	doubling_time	NA	estimate	85.7198	68.6345	NA	-26.908	-83.3033	353.089	45.9145	26.3621	13.1595
2021-09-13	doubling_time	NA	estimate	52.5095	49.0814	NA	-34.1248	-267.689	96.5948	35.5242	23.9394	12.8203
2021-09-14	doubling_time	NA	estimate	40.2848	39.3836	NA	-38.405	270.394	61.225	29.899	21.3052	12.4286
2021-09-15	doubling_time	NA	estimate	32.9564	33.1584	NA	-38.6704	98.1107	44.343	25.8938	19.1535	12.0684
2021-09-16	doubling_time	NA	estimate	27.7646	28.489	NA	-41.3228	62.7543	35.3796	22.7685	17.3378	11.5448
2021-09-17	doubling_time	NA	estimate	23.8437	24.6858	NA	-53.2247	46.6537	29.6156	19.8962	15.9664	10.9607
2021-09-18	doubling_time	NA	estimate	20.566	21.495	NA	-86.168	37.0283	24.5319	17.808	14.6823	10.3807
2021-09-19	doubling_time	NA	estimate	18.2282	18.8205	NA	-736.78	29.2526	21.2559	15.9765	13.3998	9.8026
2021-09-20	doubling_time	NA	estimate	16.2176	16.6117	NA	142.745	24.3232	18.4686	14.4617	12.3087	9.31366
2021-09-21	doubling_time	NA	estimate	14.5555	14.8228	NA	68.3797	20.8604	16.2946	13.1789	11.3639	8.69286
2021-09-22	doubling_time	NA	estimate	13.2956	13.4034	NA	43.1253	18.2335	14.7045	12.1238	10.6382	8.15184
2021-09-23	doubling_time	NA	estimate	12.3129	12.3006	NA	32.1214	16.0748	13.4977	11.3074	9.96958	7.66515
2021-09-24	doubling_time	NA	estimate	11.5612	11.463	NA	26.1416	14.7494	12.5408	10.6655	9.45456	7.25651
2021-09-25	doubling_time	NA	estimate	10.9827	10.8437	NA	22.3967	13.6146	11.8553	10.1936	9.08271	6.92344
2021-09-26	doubling_time	NA	estimate	10.5387	10.4009	NA	19.7395	13.0039	11.3059	9.84364	8.82018	6.76361
2021-09-27	doubling_time	NA	estimate	10.2053	10.0982	NA	18.1821	12.4843	10.958	9.59786	8.65612	6.71351
2021-09-28	doubling_time	NA	estimate	9.96826	9.9039	NA	17.2397	12.0539	10.6754	9.40794	8.51682	6.74075
2021-09-29	doubling_time	NA	estimate	9.86754	9.79057	NA	16.9061	11.7426	10.4771	9.28634	8.45664	6.77376
2021-09-30	doubling_time	NA	estimate	9.7531	9.7346	NA	16.851	11.6226	10.3702	9.2262	8.44147	6.83663
2021-10-01	doubling_time	NA	estimate	9.6972	9.71651	NA	16.8747	11.5371	10.3139	9.19857	8.4369	6.84133
2021-10-02	doubling_time	NA	estimate	9.664	9.72151	NA	16.678	11.5379	10.2642	9.21342	8.45491	6.86326
2021-10-03	doubling_time	NA	estimate	9.70646	9.74021	NA	16.5525	11.5075	10.3172	9.21451	8.41729	6.8759
2021-10-04	doubling_time	NA	estimate	9.74578	9.76904	NA	16.4748	11.549	10.3869	9.23096	8.44857	6.897
2021-10-05	doubling_time	NA	estimate	9.81402	9.81009	NA	16.8081	11.6069	10.4186	9.26594	8.48735	6.89883
2021-10-06	doubling_time	NA	estimate	9.90199	9.87026	NA	16.6376	11.6617	10.4748	9.34198	8.57364	6.94974
2021-10-07	doubling_time	NA	estimate	9.99196	9.95985	NA	16.6532	11.844	10.6129	9.44386	8.67739	7.05345
2021-10-08	doubling_time	NA	estimate	10.2105	10.0909	NA	16.7003	11.9895	10.7815	9.6007	8.75608	7.14173
2021-10-09	doubling_time	NA	estimate	10.4331	10.2759	NA	16.655	12.2637	11.036	9.77327	8.91293	7.24014
2021-10-10	doubling_time	NA	estimate	10.6721	10.5262	NA	16.9503	12.6686	11.3659	10.0305	9.13947	7.34632
2021-10-11	doubling_time	NA	estimate	11.0002	10.8514	NA	17.9953	13.172	11.7175	10.3271	9.37835	7.49263
2021-10-12	doubling_time	NA	estimate	11.3265	11.2584	NA	19.6149	13.6935	12.1228	10.662	9.70301	7.66402
2021-10-13	doubling_time	NA	estimate	11.7717	11.7503	NA	21.507	14.2907	12.6529	11.0639	10.0328	7.9228
2021-10-14	doubling_time	NA	estimate	12.354	12.3257	NA	23.3675	15.1209	13.274	11.5644	10.4565	8.21829
2021-10-15	doubling_time	NA	estimate	12.9898	12.9771	NA	25.9282	16.0328	13.9323	12.1496	10.8892	8.51751
2021-10-16	doubling_time	NA	estimate	13.6729	13.6896	NA	28.7602	17.0389	14.7724	12.7082	11.4404	8.93033
2021-10-17	doubling_time	NA	estimate	14.4057	14.4414	NA	31.9247	18.1939	15.5974	13.3629	11.9937	9.3386
2021-10-18	doubling_time	NA	estimate	15.1431	15.2051	NA	35.1294	19.3117	16.4933	13.9857	12.479	9.84823
2021-10-19	doubling_time	NA	estimate	15.7938	15.9514	NA	39.6714	20.5887	17.271	14.6333	12.9579	10.2597
2021-10-20	doubling_time	NA	estimate	16.5676	16.6545	NA	44.1223	21.7998	18.0925	15.1463	13.4814	10.5239
2021-10-21	doubling_time	NA	estimate	17.1717	17.2977	NA	49.0487	22.8068	18.847	15.7733	13.8527	10.735
2021-10-22	doubling_time	NA	estimate	17.8448	17.8768	NA	53.7793	23.6595	19.5344	16.325	14.1958	10.9046
2021-10-23	doubling_time	NA	estimate	18.3067	18.4018	NA	59.6055	24.7635	20.2286	16.7529	14.6357	11.0779
2021-10-24	doubling_time	NA	estimate	18.8461	18.8941	NA	63.4504	25.8393	21.0378	17.1731	14.9407	11.1229
2021-10-25	doubling_time	NA	estimate	19.3717	19.3829	NA	64.6191	26.6345	21.625	17.6209	15.2615	11.2111
2021-10-26	doubling_time	NA	estimate	19.8115	19.9012	NA	71.44	27.8725	22.3561	18.0312	15.6609	11.361
2021-10-27	doubling_time	NA	estimate	20.5804	20.4815	NA	82.5431	28.9093	23.0056	18.581	15.9744	11.4806
2021-10-28	doubling_time	NA	estimate	21.3175	21.1535	NA	91.8787	30.0214	24.237	19.1417	16.4018	11.7538
2021-10-29	doubling_time	NA	estimate	22.1017	21.9423	NA	106.95	31.7439	25.0114	19.7539	16.8403	12.1032
2021-10-30	doubling_time	NA	estimate	22.8844	22.8677	NA	126.549	33.0699	25.9214	20.62	17.4358	12.4307
2021-10-31	doubling_time	NA	estimate	23.9885	23.9455	NA	155.403	35.309	27.1705	21.2901	18.0352	12.9157
2021-11-01	doubling_time	NA	estimate	25.1372	25.1903	NA	211.768	38.234	28.6927	22.2657	18.6939	13.4998
2021-11-02	doubling_time	NA	estimate	26.5057	26.6216	NA	390.008	41.4237	30.7683	23.4725	19.3848	13.8756
2021-11-03	doubling_time	NA	estimate	28.1287	28.2736	NA	6019.79	46.2202	32.6524	24.741	20.259	14.202
2021-11-04	doubling_time	NA	estimate	30.2239	30.2105	NA	-391.7	51.307	35.5833	26.1248	21.2635	14.6303
2021-11-05	doubling_time	NA	estimate	32.5494	32.5501	NA	-177.976	58.4229	39.2992	28.026	22.6338	15.0349
2021-11-06	doubling_time	NA	estimate	36.1234	35.5043	NA	-132.263	69.75	44.0905	30.4646	23.9358	15.5897
2021-11-07	doubling_time	NA	estimate	40.6035	39.4573	NA	-98.9481	85.1415	50.4039	33.8835	25.7563	16.1515
2021-11-08	doubling_time	NA	estimate	47.558	45.1415	NA	-78.3778	119.69	61.5596	38.4393	27.9001	16.7606
2021-11-09	doubling_time	NA	estimate	58.4255	54.1076	NA	-60.9322	231.522	82.2209	44.515	31.1565	17.7344
2021-11-10	doubling_time	NA	estimate	77.994	70.283	NA	-51.3092	-7889.35	126.682	55.1503	36.3353	18.9766
2021-11-11	doubling_time	NA	estimate	124.993	107.401	NA	-42.2448	-188.51	363.673	77.3317	44.4775	21.0857
2021-11-12	doubling_time	NA	estimate	486.064	271.318	NA	-33.9268	-91.0341	-314.481	130.32	58.8516	24.2915
2021-11-13	doubling_time	NA	estimate	-249.155	-378.578	NA	-28.4055	-56.7268	-107.704	701.086	92.5197	28.6851
2021-11-14	doubling_time	NA	estimate	-94.1894	-104.096	NA	-23.0462	-40.9686	-62.8544	-180.18	284.329	36.1819
2021-11-15	doubling_time	NA	estimate	-55.2406	-58.5269	NA	-19.7769	-32.0586	-43.358	-76.8832	-250.146	47.9359
2021-11-16	doubling_time	NA	estimate	-39.0988	-40.1544	NA	-17.0165	-25.7148	-32.8545	-48.1872	-82.4003	80.3883
2021-11-17	doubling_time	NA	estimate	-30.0831	-30.4487	NA	-14.7815	-21.4664	-26.4848	-35.0129	-50.8821	273.941
2021-11-18	doubling_time	NA	estimate	-24.5751	-24.5952	NA	-13.1742	-18.5747	-22.0226	-27.651	-36.1994	-202.663
2021-11-19	doubling_time	NA	estimate	-20.7563	-20.7891	NA	-11.9145	-16.4406	-18.9098	-23.2799	-28.8695	-76.5845
2021-11-20	doubling_time	NA	estimate	-18.4054	-18.2036	NA	-10.9112	-14.7569	-16.8779	-20.1162	-24.2725	-49.617
2021-11-21	doubling_time	NA	estimate	-16.6371	-16.4093	NA	-10.2175	-13.4705	-15.3777	-18.0832	-21.2432	-37.4787
2021-11-22	doubling_time	NA	estimate	-15.4323	-15.1624	NA	-9.75515	-12.5747	-14.2769	-16.7136	-19.303	-30.892
2021-11-23	doubling_time	NA	estimate	-14.5279	-14.316	NA	-9.32951	-11.9834	-13.5754	-15.6912	-17.9745	-27.502
2021-11-24	doubling_time	NA	estimate	-14.0737	-13.7771	NA	-9.15011	-11.6326	-13.0408	-15.0302	-17.1622	-25.5644
2021-11-25	doubling_time	NA	estimate	-13.6914	-13.4842	NA	-9.06182	-11.4639	-12.6966	-14.6422	-16.6971	-24.7107
2021-11-26	doubling_time	NA	estimate	-13.5549	-13.3943	NA	-9.0003	-11.3462	-12.6777	-14.5017	-16.4594	-24.6764
2021-11-27	doubling_time	NA	estimate	-13.5662	-13.4749	NA	-9.07088	-11.4214	-12.7349	-14.5132	-16.4812	-25.102
2021-11-28	doubling_time	NA	estimate	-13.7455	-13.698	NA	-9.26875	-11.5468	-12.899	-14.6224	-16.6085	-26.8132
2021-11-29	doubling_time	NA	estimate	-13.9214	-14.0351	NA	-9.5038	-11.7701	-13.1009	-14.9485	-17.0586	-28.2594
2021-11-30	doubling_time	NA	estimate	-14.3249	-14.4543	NA	-9.76242	-12.0774	-13.3707	-15.3164	-17.6078	-30.6203
2021-12-01	doubling_time	NA	estimate	-14.6332	-14.9177	NA	-9.96539	-12.3585	-13.7304	-15.8127	-18.4552	-33.8162
2021-12-02	doubling_time	NA	estimate	-15.0584	-15.3827	NA	-10.2223	-12.691	-14.0399	-16.3189	-19.161	-37.4427
2021-12-03	doubling_time	NA	estimate	-15.409	-15.8053	NA	-10.4125	-12.9247	-14.3485	-16.6515	-19.8356	-40.3526
2021-12-04	doubling_time	NA	estimate	-15.7148	-16.1481	NA	-10.5873	-13.1211	-14.5903	-17.0267	-20.4018	-43.375
2021-12-05	doubling_time	NA	estimate	-15.9978	-16.3884	NA	-10.6656	-13.2536	-14.8231	-17.3713	-20.8226	-44.9911
2021-12-06	doubling_time	NA	estimate	-16.1809	-16.5241	NA	-10.6052	-13.3516	-14.9442	-17.6705	-21.0527	-45.1598
2021-12-07	doubling_time	NA	estimate	-16.3769	-16.5736	NA	-10.4647	-13.3843	-15.0965	-17.8413	-21.1017	-45.5051
2021-12-08	doubling_time	NA	estimate	-16.4998	-16.5706	NA	-10.3212	-13.4308	-15.1365	-18.0267	-21.4502	-44.5775
2021-12-09	doubling_time	NA	estimate	-16.5097	-16.5559	NA	-10.2289	-13.408	-15.277	-18.1295	-21.5747	-44.9331
2021-12-10	doubling_time	NA	estimate	-16.6553	-16.5698	NA	-10.2004	-13.3725	-15.3034	-18.1845	-21.8154	-43.2254
2021-12-11	doubling_time	NA	estimate	-16.7708	-16.6476	NA	-10.2165	-13.4329	-15.3918	-18.425	-22.0087	-41.9293
2021-12-12	doubling_time	NA	estimate	-17.0514	-16.8166	NA	-10.2525	-13.5486	-15.6182	-18.786	-22.3701	-41.1688
2021-12-13	doubling_time	NA	estimate	-17.4042	-17.096	NA	-10.2519	-13.776	-15.9206	-19.1345	-22.8438	-42.6466
2021-12-14	doubling_time	NA	estimate	-17.7053	-17.4959	NA	-10.4093	-14.1186	-16.2345	-19.4407	-23.6242	-45.6392
2021-12-15	doubling_time	NA	estimate	-18.1865	-18.0157	NA	-10.5535	-14.4769	-16.598	-20.1695	-24.2428	-52.5373
2021-12-16	doubling_time	NA	estimate	-18.8181	-18.6412	NA	-10.9038	-14.9016	-17.0218	-20.8242	-25.2114	-59.3951
2021-12-17	doubling_time	NA	estimate	-19.346	-19.3411	NA	-11.2112	-15.2807	-17.618	-21.469	-26.4912	-68.6871
2021-12-18	doubling_time	NA	estimate	-19.9354	-20.0642	NA	-11.4453	-15.6618	-18.1443	-22.3063	-27.8823	-83.9179
2021-12-19	doubling_time	NA	estimate	-20.5917	-20.7397	NA	-11.5645	-15.8964	-18.6658	-23.1902	-29.3905	-107.023
2021-12-20	doubling_time	NA	estimate	-21.0572	-21.2855	NA	-11.7802	-16.1369	-18.9168	-24.0198	-30.8089	-129.977
2021-12-21	doubling_time	NA	estimate	-21.2683	-21.6241	NA	-11.9906	-16.1447	-19.0403	-24.5918	-31.8116	-170.034
2021-12-22	doubling_time	NA	estimate	-21.3562	-21.7023	NA	-11.9473	-16.0742	-18.9562	-24.4717	-31.9629	-184.108
2021-12-23	doubling_time	NA	estimate	-20.9156	-21.5071	NA	-11.8397	-15.9684	-18.7619	-24.0477	-31.5282	-229.177
2021-12-24	doubling_time	NA	estimate	-20.6436	-21.0693	NA	-11.6979	-15.7115	-18.5334	-23.3572	-30.3048	-185.412
2021-12-25	doubling_time	NA	estimate	-20.0227	-20.453	NA	-11.5012	-15.382	-18.1743	-22.4822	-29.3791	-138.288
2021-12-26	doubling_time	NA	estimate	-19.4717	-19.7383	NA	-11.162	-14.9976	-17.5992	-21.8374	-27.9442	-109.681
2021-12-27	doubling_time	NA	estimate	-18.9415	-19.0041	NA	-10.8946	-14.5388	-17.0287	-21.1945	-26.507	-84.3856
2021-12-28	doubling_time	NA	estimate	-18.3284	-18.3174	NA	-10.5846	-14.0702	-16.5066	-20.5233	-25.4398	-71.5041
2021-12-29	doubling_time	NA	estimate	-17.6896	-17.7304	NA	-10.3282	-13.662	-15.9451	-19.8133	-24.8288	-62.9385
2021-12-30	doubling_time	NA	estimate	-17.4172	-17.2818	NA	-9.96138	-13.3675	-15.511	-19.4667	-24.5735	-62
2021-12-31	doubling_time	NA	estimate	-17.1109	-17.0021	NA	-9.75365	-13.1218	-15.359	-19.3061	-24.0482	-57.3186
2022-01-01	doubling_time	NA	estimate	-17.1093	-16.9197	NA	-9.62682	-13.0268	-15.3141	-19.2341	-24.3623	-57.2403
2022-01-02	doubling_time	NA	estimate	-17.3268	-17.068	NA	-9.51167	-13.0693	-15.5957	-19.7891	-24.9188	-63.3763
2022-01-03	doubling_time	NA	estimate	-17.9898	-17.4945	NA	-9.50047	-13.3327	-15.9314	-20.3616	-26.1269	-72.205
2022-01-04	doubling_time	NA	estimate	-18.9362	-18.275	NA	-9.73051	-13.7212	-16.6338	-21.4353	-27.9748	-87.4188
2022-01-05	doubling_time	NA	estimate	-19.8493	-19.5371	NA	-9.92974	-14.4956	-17.6236	-23.162	-31.3836	-157.652
2022-01-06	doubling_time	NA	estimate	-21.7962	-21.5115	NA	-10.3863	-15.3502	-18.92	-25.4822	-37.3769	2226.68
2022-01-07	doubling_time	NA	estimate	-24.8396	-24.6495	NA	-10.739	-16.4063	-20.8499	-30.5148	-49.9772	91.5301
2022-01-08	doubling_time	NA	estimate	-29.8848	-29.9561	NA	-10.9834	-17.8242	-23.7731	-41.1283	-98.5597	40.9854
2022-01-09	doubling_time	NA	estimate	-40.0622	-40.1802	NA	-10.6884	-19.5111	-28.2494	-69.5514	376.682	23.1915
2022-01-10	doubling_time	NA	estimate based on partial data	-65.5009	-66.4182	NA	-10.3592	-20.467	-36.3598	-502.652	53.2969	14.6669
2022-01-11	doubling_time	NA	estimate based on partial data	-230.16	-258.402	NA	-9.5723	-21.6044	-47.3994	82.9488	26.4639	9.90016
2022-01-12	doubling_time	NA	estimate based on partial data	195.897	115.332	NA	-8.75498	-21.6408	-68.9936	38.5242	17.2132	6.79234
2022-01-13	doubling_time	NA	estimate based on partial data	69.368	44.3602	NA	-8.12823	-21.421	-120.356	26.1738	12.16	5.00802
2022-01-14	doubling_time	NA	estimate based on partial data	41.2627	26.529	NA	-7.4133	-21.0029	-277.286	19.194	9.40883	3.80172
2022-01-15	doubling_time	NA	estimate based on partial data	31.0328	18.504	NA	-6.8968	-20.2021	-1266.36	14.9747	7.54782	3.00898
2022-01-16	doubling_time	NA	estimate based on partial data	24.8991	13.9916	NA	-6.35226	-19.2538	483.46	12.3959	6.33809	2.44879
2022-01-17	doubling_time	NA	estimate based on partial data	20.9039	11.1303	NA	-5.82754	-18.0939	212.236	10.6799	5.40742	1.99516
2022-01-18	doubling_time	NA	estimate based on partial data	18.2895	9.17286	NA	-5.46885	-16.8749	199.088	9.42431	4.75593	1.70847
2021-08-17	infections	NA	estimate	59.7521	60.3007	8.50194	47.4241	54.0754	57.6777	61.8203	65.6383	75.1667
2021-08-18	infections	NA	estimate	67.8081	68.9934	13.257	49.1734	59.0898	64.6016	71.4998	77.6576	92.4108
2021-08-19	infections	NA	estimate	72.6035	73.8531	16.4324	49.1177	61.4342	68.4375	77.181	84.7246	102.288
2021-08-20	infections	NA	estimate	73.1475	73.8509	16.538	47.8401	61.5034	68.8141	77.9336	85.1593	101.494
2021-08-21	infections	NA	estimate	69.7842	69.6449	14.179	46.1151	59.3259	66.0924	73.3763	79.9735	92.1961
2021-08-22	infections	NA	estimate	63.3566	62.7921	10.8178	43.7563	55.5125	60.567	65.8862	70.515	79.7698
2021-08-23	infections	NA	estimate	55.1505	54.9047	7.80822	41.305	49.86	53.2082	56.9315	60.1673	67.3079
2021-08-24	infections	NA	estimate	46.9558	47.1401	5.94006	37.631	43.1534	45.5208	48.5832	51.0968	57.0111
2021-08-25	infections	NA	estimate	40.1088	40.1852	5.23222	31.6665	36.7143	38.7972	41.4055	43.6859	48.836
2021-08-26	infections	NA	estimate	34.4146	34.2911	5.10428	25.6416	31.0088	33.0483	35.5981	37.7041	42.5183
2021-08-27	infections	NA	estimate	29.7262	29.4668	5.05629	20.7046	25.9964	28.3902	30.9264	33.0108	37.3484
2021-08-28	infections	NA	estimate	25.8482	25.6062	4.90399	17.265	22.088	24.4648	27.1395	29.0868	33.225
2021-08-29	infections	NA	estimate	22.6056	22.565	4.62932	14.85	19.0693	21.2705	24.0404	25.9364	29.9704
2021-08-30	infections	NA	estimate	20.1447	20.2006	4.26351	13.3427	16.9484	18.9126	21.4281	23.3452	27.2937
2021-08-31	infections	NA	estimate	18.1708	18.3879	3.8434	12.4102	15.457	17.1465	19.3258	21.1513	25.0299
2021-09-01	infections	NA	estimate	16.749	17.0237	3.40074	11.9382	14.4429	15.86	17.7295	19.372	23.0586
2021-09-02	infections	NA	estimate	15.7237	16.0062	2.98755	11.6536	13.7585	14.9248	16.5226	17.9655	21.3421
2021-09-03	infections	NA	estimate	15.0227	15.2833	2.61696	11.4544	13.3634	14.3589	15.7016	16.963	20.0322
2021-09-04	infections	NA	estimate	14.5568	14.8042	2.31715	11.4264	13.101	14.0352	15.1809	16.2843	18.9234
2021-09-05	infections	NA	estimate	14.3183	14.529	2.11494	11.3887	12.9847	13.8125	14.8964	15.8962	18.2811
2021-09-06	infections	NA	estimate	14.2373	14.4225	2.02532	11.3911	12.9622	13.7196	14.7921	15.7139	17.9814
2021-09-07	infections	NA	estimate	14.2796	14.4506	2.03507	11.4577	13.003	13.7568	14.8122	15.6963	18.0567
2021-09-08	infections	NA	estimate	14.394	14.5795	2.10168	11.5753	13.0752	13.851	14.9233	15.8296	18.4285
2021-09-09	infections	NA	estimate	14.5511	14.778	2.17527	11.7032	13.2332	14.0095	15.0975	16.0621	18.7942
2021-09-10	infections	NA	estimate	14.7897	15.0215	2.22218	11.8377	13.4467	14.2435	15.3218	16.3109	19.1803
2021-09-11	infections	NA	estimate	15.0686	15.2952	2.23327	12.0402	13.7065	14.5249	15.596	16.631	19.4394
2021-09-12	infections	NA	estimate	15.3828	15.5955	2.21817	12.3312	14.0205	14.8621	15.9217	16.9356	19.5366
2021-09-13	infections	NA	estimate	15.7071	15.9281	2.19407	12.6935	14.3782	15.2306	16.2935	17.2433	19.851
2021-09-14	infections	NA	estimate	16.1258	16.3055	2.1763	13.084	14.7779	15.5977	16.6448	17.6276	20.2265
2021-09-15	infections	NA	estimate	16.5809	16.7442	2.17359	13.4931	15.2502	16.0383	17.1148	18.1099	20.6862
2021-09-16	infections	NA	estimate	17.1042	17.2625	2.18767	13.9613	15.7291	16.5997	17.6345	18.6199	21.1373
2021-09-17	infections	NA	estimate	17.7337	17.8788	2.2156	14.4284	16.3601	17.223	18.3119	19.2482	21.704
2021-09-18	infections	NA	estimate	18.5178	18.6111	2.25308	15.0701	17.0904	17.9626	19.0626	20.0227	22.4281
2021-09-19	infections	NA	estimate	19.4191	19.4759	2.29737	15.8403	17.9472	18.8269	19.9457	20.9088	23.3353
2021-09-20	infections	NA	estimate	20.4081	20.4878	2.34953	16.8126	18.9164	19.8565	20.9954	21.9859	24.5054
2021-09-21	infections	NA	estimate	21.5746	21.6587	2.4153	17.8912	20.0368	20.9747	22.1236	23.2006	25.8059
2021-09-22	infections	NA	estimate	22.8804	22.9973	2.50386	19.0409	21.294	22.2832	23.5062	24.5725	27.3081
2021-09-23	infections	NA	estimate	24.398	24.5078	2.62382	20.4645	22.7168	23.7593	25.0393	26.1774	28.9844
2021-09-24	infections	NA	estimate	26.0778	26.1904	2.77812	21.8868	24.3171	25.398	26.7426	27.9641	30.9753
2021-09-25	infections	NA	estimate	27.8602	28.0417	2.96167	23.4338	25.9974	27.1653	28.6053	29.9912	33.1029
2021-09-26	infections	NA	estimate	29.8524	30.0562	3.16395	25.1764	27.9189	29.1123	30.6371	32.0913	35.4868
2021-09-27	infections	NA	estimate	32.062	32.229	3.37411	27.0864	29.927	31.2353	32.815	34.4153	38.1039
2021-09-28	infections	NA	estimate	34.3066	34.5574	3.58494	29.163	32.1106	33.4574	35.2108	36.8258	40.8835
2021-09-29	infections	NA	estimate	36.8148	37.0431	3.79435	31.2587	34.4506	35.8632	37.7958	39.3791	43.7093
2021-09-30	infections	NA	estimate	39.4776	39.6924	4.00493	33.5594	36.9072	38.5027	40.5285	42.22	46.7006
2021-10-01	infections	NA	estimate	42.3493	42.5156	4.22265	35.9142	39.6242	41.323	43.367	45.0985	49.6524
2021-10-02	infections	NA	estimate	45.3268	45.5259	4.4553	38.4797	42.5132	44.2974	46.4773	48.2351	53.1229
2021-10-03	infections	NA	estimate	48.5432	48.7368	4.71007	41.3371	45.5872	47.4629	49.7203	51.6079	56.8164
2021-10-04	infections	NA	estimate	51.9471	52.1595	4.99057	44.451	48.8037	50.8106	53.2251	55.2329	60.693
2021-10-05	infections	NA	estimate	55.5482	55.7995	5.29487	47.5714	52.1602	54.3113	56.8601	59.1239	64.8545
2021-10-06	infections	NA	estimate	59.4585	59.6544	5.61621	50.8517	55.8063	58.0303	60.8247	63.1455	69.4743
2021-10-07	infections	NA	estimate	63.5001	63.7119	5.9463	54.3245	59.5943	61.9602	64.9498	67.3539	73.7946
2021-10-08	infections	NA	estimate	67.6965	67.9492	6.27988	57.933	63.6026	66.1174	69.2493	72.0598	78.5509
2021-10-09	infections	NA	estimate	72.0817	72.3342	6.61788	61.8839	67.8131	70.4398	73.6383	76.5361	83.7702
2021-10-10	infections	NA	estimate	76.4563	76.8274	6.96675	66.0626	72.0275	74.852	78.2808	81.1712	88.9458
2021-10-11	infections	NA	estimate	81.109	81.3863	7.33455	70.1985	76.3717	79.2404	82.8517	85.9936	94.1027
2021-10-12	infections	NA	estimate	85.6382	85.969	7.72725	74.2334	80.7315	83.72	87.5062	90.7688	99.5092
2021-10-13	infections	NA	estimate	90.1459	90.5392	8.14604	77.9874	84.7212	88.3097	92.0874	95.5062	104.795
2021-10-14	infections	NA	estimate	94.7355	95.0699	8.58429	81.7721	89.0586	92.6218	96.7536	100.321	110.099
2021-10-15	infections	NA	estimate	99.1599	99.5455	9.02619	85.5854	93.4361	96.8268	101.351	105.159	115.256
2021-10-16	infections	NA	estimate	103.484	103.964	9.45095	89.2767	97.5473	101.091	105.904	109.89	119.939
2021-10-17	infections	NA	estimate	107.892	108.335	9.84145	92.8423	101.571	105.439	110.192	114.748	124.88
2021-10-18	infections	NA	estimate	112.147	112.679	10.1916	96.7585	105.616	109.75	114.713	119.309	130.148
2021-10-19	infections	NA	estimate	116.414	117.022	10.5078	100.56	109.827	114.069	119.05	123.935	134.851
2021-10-20	infections	NA	estimate	120.824	121.393	10.8042	104.339	114.102	118.273	123.493	128.305	140.077
2021-10-21	infections	NA	estimate	125.288	125.814	11.0966	108.101	118.384	122.447	127.917	132.883	144.988
2021-10-22	infections	NA	estimate	129.781	130.302	11.3979	112.211	122.608	127.06	132.573	137.406	150.402
2021-10-23	infections	NA	estimate	134.289	134.859	11.7182	116.593	126.836	131.571	137.247	142.092	155.149
2021-10-24	infections	NA	estimate	139.013	139.481	12.0662	120.791	131.172	135.841	142.052	147.018	160.262
2021-10-25	infections	NA	estimate	143.635	144.148	12.4497	124.971	135.432	140.589	146.784	151.981	165.498
2021-10-26	infections	NA	estimate	148.381	148.834	12.8749	128.818	140.002	145.067	151.468	156.99	170.633
2021-10-27	infections	NA	estimate	152.949	153.507	13.3423	132.672	144.434	149.706	156.26	161.849	176.385
2021-10-28	infections	NA	estimate	157.433	158.13	13.8405	136.267	148.744	154.296	161.006	166.537	182.267
2021-10-29	infections	NA	estimate	162.106	162.667	14.3425	140.043	152.68	158.775	165.525	171.541	187.151
2021-10-30	infections	NA	estimate	166.292	167.087	14.8129	144.109	156.92	162.814	170.094	176.427	191.869
2021-10-31	infections	NA	estimate	170.686	171.361	15.2223	147.805	160.904	167.049	174.543	180.938	197.286
2021-11-01	infections	NA	estimate	174.782	175.468	15.5602	151.619	164.646	171.132	178.663	185.076	202.542
2021-11-02	infections	NA	estimate	178.844	179.391	15.8365	154.628	168.38	175.046	182.799	189.392	207.371
2021-11-03	infections	NA	estimate	182.614	183.11	16.0734	157.646	172.303	178.698	186.503	193.185	210.74
2021-11-04	infections	NA	estimate	186.271	186.597	16.2936	160.792	175.501	182.071	190.297	196.926	214.432
2021-11-05	infections	NA	estimate	189.555	189.811	16.5111	163.521	178.525	185.368	193.602	200.362	217.488
2021-11-06	infections	NA	estimate	192.361	192.692	16.7276	166.422	181.151	188.126	196.475	203.357	220.886
2021-11-07	infections	NA	estimate	194.58	195.158	16.9354	168.102	183.477	190.384	199.029	205.753	224.067
2021-11-08	infections	NA	estimate	196.473	197.106	17.1234	170.185	185.433	192.471	200.438	207.774	226.081
2021-11-09	infections	NA	estimate	197.707	198.417	17.2834	171.586	186.78	193.715	201.877	209.101	228.086
2021-11-10	infections	NA	estimate	198.13	198.963	17.4101	172.158	186.978	193.961	202.278	209.766	228.558
2021-11-11	infections	NA	estimate	197.604	198.615	17.4938	171.696	186.672	193.464	202.107	209.603	228.819
2021-11-12	infections	NA	estimate	196.289	197.262	17.5104	170.028	185.12	191.848	200.75	208.353	227.675
2021-11-13	infections	NA	estimate	193.796	194.824	17.4217	168.242	182.847	189.364	198.098	205.625	224.97
2021-11-14	infections	NA	estimate	190.145	191.266	17.1911	165.345	179.125	185.965	194.561	201.705	221.18
2021-11-15	infections	NA	estimate	185.511	186.616	16.8054	161.506	174.912	181.598	189.764	196.608	215.702
2021-11-16	infections	NA	estimate	179.895	180.962	16.2847	156.043	169.829	175.974	183.95	190.818	209.256
2021-11-17	infections	NA	estimate	173.489	174.455	15.6727	150.645	163.906	169.844	177.273	184.096	201.876
2021-11-18	infections	NA	estimate	166.317	167.287	15.0152	144.326	157.205	162.937	170.149	176.617	193.16
2021-11-19	infections	NA	estimate	158.901	159.679	14.3459	137.633	149.801	155.586	162.48	168.437	184.14
2021-11-20	infections	NA	estimate	151.321	151.858	13.6851	130.378	142.445	147.873	154.627	160.209	175.248
2021-11-21	infections	NA	estimate	143.544	144.039	13.0462	123.858	135.2	140.272	146.654	152.14	166.609
2021-11-22	infections	NA	estimate	135.891	136.406	12.4395	117.072	127.995	132.682	139.005	144.19	157.604
2021-11-23	infections	NA	estimate	128.574	129.109	11.8716	110.476	121.051	125.656	131.451	136.701	149.556
2021-11-24	infections	NA	estimate	121.775	122.251	11.3439	104.362	114.598	118.981	124.579	129.241	141.667
2021-11-25	infections	NA	estimate	115.422	115.895	10.8524	98.4518	108.558	112.8	118.099	122.866	134.249
2021-11-26	infections	NA	estimate	109.657	110.062	10.3904	93.6166	103.077	107.065	112.181	116.633	127.78
2021-11-27	infections	NA	estimate	104.284	104.741	9.95135	89.0975	97.9454	101.892	106.877	111.058	121.611
2021-11-28	infections	NA	estimate	99.4517	99.8977	9.53135	85.2185	93.3792	97.1985	101.919	105.986	116.281
2021-11-29	infections	NA	estimate	95.1645	95.4794	9.12971	81.389	89.2883	92.8863	97.406	101.19	111.194
2021-11-30	infections	NA	estimate	91.0545	91.4245	8.7479	77.7561	85.4051	88.8558	93.3195	96.8547	106.703
2021-12-01	infections	NA	estimate	87.2058	87.668	8.38792	74.8013	82.0321	85.2404	89.31	92.8898	102.099
2021-12-02	infections	NA	estimate	83.6517	84.1479	8.05095	71.8508	78.645	81.7872	85.7153	89.0864	98.1314
2021-12-03	infections	NA	estimate	80.4033	80.8092	7.73589	68.979	75.6277	78.5122	82.21	85.5586	94.39
2021-12-04	infections	NA	estimate	77.1109	77.6081	7.4383	66.309	72.5546	75.2612	79.0582	82.1941	90.6372
2021-12-05	infections	NA	estimate	74.0496	74.5137	7.15166	63.6557	69.6196	72.3112	75.919	78.9164	86.8524
2021-12-06	infections	NA	estimate	71.0357	71.5103	6.87164	61.0791	66.8218	69.4605	72.7972	75.6636	83.3126
2021-12-07	infections	NA	estimate	68.1649	68.5955	6.60022	58.6561	64.0037	66.649	69.8844	72.6426	79.8314
2021-12-08	infections	NA	estimate	65.3968	65.7784	6.34528	56.1531	61.3491	63.8868	66.9837	69.6614	76.8315
2021-12-09	infections	NA	estimate	62.7308	63.0752	6.11528	53.8492	58.7893	61.2592	64.2496	66.8436	73.8154
2021-12-10	infections	NA	estimate	60.1867	60.5044	5.91345	51.6358	56.3308	58.7135	61.7046	64.0688	70.7699
2021-12-11	infections	NA	estimate	57.7757	58.0824	5.73566	49.3447	54.1049	56.3813	59.2022	61.5874	68.1272
2021-12-12	infections	NA	estimate	55.5276	55.8208	5.57275	47.2656	51.9827	54.1615	56.9592	59.2546	65.5983
2021-12-13	infections	NA	estimate	53.4661	53.7246	5.41489	45.3628	50.0476	52.1252	54.8818	57.1422	63.0826
2021-12-14	infections	NA	estimate	51.5794	51.7917	5.25548	43.5621	48.2037	50.2959	52.9035	55.1598	60.8299
2021-12-15	infections	NA	estimate	49.8023	50.0131	5.09308	42.0694	46.6406	48.5267	51.1025	53.2395	58.7237
2021-12-16	infections	NA	estimate	48.2153	48.3736	4.93106	40.6435	45.0844	46.9475	49.5105	51.5255	56.8698
2021-12-17	infections	NA	estimate	46.7102	46.8532	4.77523	39.3874	43.6536	45.5168	47.9445	49.8364	54.9276
2021-12-18	infections	NA	estimate	45.2964	45.4279	4.6305	38.0701	42.2831	44.1336	46.3942	48.3849	53.2737
2021-12-19	infections	NA	estimate	43.9633	44.0718	4.49817	37.0678	41.0041	42.7589	45.0226	46.9766	51.6304
2021-12-20	infections	NA	estimate	42.6161	42.7588	4.3753	35.9591	39.7382	41.4785	43.6553	45.6195	50.1652
2021-12-21	infections	NA	estimate	41.296	41.4651	4.25662	34.9423	38.4724	40.2402	42.3818	44.1791	48.7293
2021-12-22	infections	NA	estimate	39.9931	40.1714	4.13825	33.8469	37.2525	38.9255	41.0528	42.8457	47.2754
2021-12-23	infections	NA	estimate	38.626	38.864	4.02038	32.7537	36.0614	37.6631	39.6525	41.506	45.7241
2021-12-24	infections	NA	estimate	37.3363	37.5363	3.9061	31.5748	34.7898	36.2908	38.2863	40.121	44.2223
2021-12-25	infections	NA	estimate	35.9665	36.1883	3.79764	30.4965	33.4925	34.9729	36.9296	38.687	42.7238
2021-12-26	infections	NA	estimate	34.6139	34.8258	3.69413	29.2635	32.1453	33.6738	35.4642	37.1753	41.3097
2021-12-27	infections	NA	estimate	33.239	33.46	3.59347	28.0227	30.8933	32.354	34.0739	35.7001	39.8579
2021-12-28	infections	NA	estimate	31.8695	32.1058	3.49578	26.7274	29.6799	30.9986	32.7104	34.1921	38.2325
2021-12-29	infections	NA	estimate	30.5244	30.7807	3.4052	25.6091	28.4266	29.7212	31.3765	32.9234	36.6937
2021-12-30	infections	NA	estimate	29.322	29.5034	3.32833	24.3545	27.2037	28.5015	30.116	31.6484	35.1634
2021-12-31	infections	NA	estimate	28.1581	28.2922	3.27048	23.1782	26.0206	27.2535	28.9447	30.4135	33.909
2022-01-01	infections	NA	estimate	26.9962	27.1641	3.23219	22.145	24.873	26.1247	27.8912	29.269	32.6779
2022-01-02	infections	NA	estimate	25.9819	26.1337	3.20822	21.1721	23.8933	25.1257	26.795	28.2442	31.5594
2022-01-03	infections	NA	estimate	25.0487	25.2133	3.18934	20.2278	22.9668	24.2298	25.8578	27.3349	30.5918
2022-01-04	infections	NA	estimate	24.266	24.4131	3.16639	19.4088	22.2384	23.4669	25.0644	26.5169	29.7601
2022-01-05	infections	NA	estimate	23.6293	23.7424	3.13563	18.6764	21.5876	22.8553	24.3898	25.7837	28.9553
2022-01-06	infections	NA	estimate	23.1017	23.2104	3.10493	18.1694	21.0759	22.3498	23.8727	25.2159	28.487
2022-01-07	infections	NA	estimate	22.6885	22.8287	3.10116	17.8756	20.7054	21.9276	23.4843	24.8776	28.0103
2022-01-08	infections	NA	estimate	22.4442	22.6131	3.17891	17.6626	20.3915	21.6863	23.2897	24.6398	28.0217
2022-01-09	infections	NA	estimate	22.3944	22.5869	3.42588	17.2494	20.2088	21.5944	23.2512	24.7675	28.5276
2022-01-10	infections	NA	estimate based on partial data	22.5325	22.7854	3.95593	16.7047	20.0856	21.63	23.4925	25.2313	29.8362
2022-01-11	infections	NA	estimate based on partial data	22.9245	23.2627	4.89714	15.6843	19.9426	21.7788	24.1884	26.2777	31.7845
2022-01-12	infections	NA	estimate based on partial data	23.4858	24.1027	6.40873	14.5405	19.6139	21.9668	25.261	28.0123	35.4142
2022-01-13	infections	NA	estimate based on partial data	24.2883	25.4398	8.75469	13.4086	19.1979	22.2127	26.5318	30.3357	41.6881
2022-01-14	infections	NA	estimate based on partial data	25.177	27.4983	12.4667	11.9522	18.6633	22.5764	28.1047	33.5132	51.5615
2022-01-15	infections	NA	estimate based on partial data	26.1293	30.6768	18.7455	10.5542	18.1675	22.8571	29.8452	37.781	67.2722
2022-01-16	infections	NA	estimate based on partial data	27.3448	35.7445	30.6534	9.34194	17.4524	23.0719	32.0332	43.0626	90.9711
2022-01-17	infections	NA	estimate based on partial data	28.5913	44.3523	57.0873	8.16436	16.7885	23.4403	34.8192	50.1825	131.667
2022-01-18	infections	NA	estimate based on partial data	29.8001	60.5492	127.195	7.05912	16.1192	23.692	37.9543	58.6468	200.801
2021-08-17	reported_cases	NA	estimate	15	16.0512	6.47013	7	12	14	17	20	28
2021-08-18	reported_cases	NA	estimate	19	19.7385	8.07719	9	14	17	21	24	35
2021-08-19	reported_cases	NA	estimate	21	22.1505	9.10484	10	16	19	23	27	39
2021-08-20	reported_cases	NA	estimate	25	26.189	10.5103	13	19	22	27	32	45
2021-08-21	reported_cases	NA	estimate	30	32.067	11.6143	16	24	28	33	38	54
2021-08-22	reported_cases	NA	estimate	35	35.9192	11.7076	19	28	32	38	43	57
2021-08-23	reported_cases	NA	estimate	34	34.8915	10.5895	19	27	32	37	41	53
2021-08-24	reported_cases	NA	estimate	49	49.8398	14.7068	28	40	45	52	59	76
2021-08-25	reported_cases	NA	estimate	56	56.8513	16.4824	31.95	45	52	60	67	86
2021-08-26	reported_cases	NA	estimate	56	57.2	16.8057	32	45	52	60	68	87
2021-08-27	reported_cases	NA	estimate	57	58.12	17.6789	32	45	52	61	69	90
2021-08-28	reported_cases	NA	estimate	57	58.2638	17.1798	33	46	53	61	69	89
2021-08-29	reported_cases	NA	estimate	52	52.831	15.7168	29	42	48	55	63	80
2021-08-30	reported_cases	NA	estimate	40	41.1632	12.3248	23	32	37	43	49	63
2021-08-31	reported_cases	NA	estimate	48	49.0562	14.5684	27	39	44	52	58	75
2021-09-01	reported_cases	NA	estimate	46	47.024	13.7783	26	37	43	49	55	71
2021-09-02	reported_cases	NA	estimate	40	40.8422	12.6418	22	32	37	43	49	63
2021-09-03	reported_cases	NA	estimate	35	36.425	11.2719	20	29	33	38	43	57
2021-09-04	reported_cases	NA	estimate	32	33.486	10.4149	18	26	30	35	40	52
2021-09-05	reported_cases	NA	estimate	27	28.2948	9.11387	15	22	25	30	34	44
2021-09-06	reported_cases	NA	estimate	21	21.4438	7.38319	11	16	19	22	26	35
2021-09-07	reported_cases	NA	estimate	24	24.858	8.57722	13	19	22	26	30	41
2021-09-08	reported_cases	NA	estimate	23	23.6408	8.20076	12	18	21	25	29	38
2021-09-09	reported_cases	NA	estimate	20	20.892	7.37882	10	16	18	22	25	34
2021-09-10	reported_cases	NA	estimate	19	19.5613	6.99081	10	15	17	20	24	32
2021-09-11	reported_cases	NA	estimate	18	18.8822	6.81249	9	14	17	20	23	31
2021-09-12	reported_cases	NA	estimate	16	16.9325	6.0102	8	12	15	18	21	28
2021-09-13	reported_cases	NA	estimate	13	13.5808	5.12831	6	10	12	14	16	23
2021-09-14	reported_cases	NA	estimate	16	16.9155	6.04533	8	13	15	18	21	28
2021-09-15	reported_cases	NA	estimate	17	17.1415	6.13281	8	13	15	18	21	28
2021-09-16	reported_cases	NA	estimate	16	16.4662	5.97656	8	12	14	18	20	27
2021-09-17	reported_cases	NA	estimate	16	16.2765	5.83486	8	12	14	17	20	27
2021-09-18	reported_cases	NA	estimate	16	16.5622	6.03736	8	12	15	18	20	28
2021-09-19	reported_cases	NA	estimate	15	15.8615	5.73699	7	12	14	17	19	26
2021-09-20	reported_cases	NA	estimate	13	13.194	5.0656	6	10	11	14	16	22
2021-09-21	reported_cases	NA	estimate	17	17.264	6.16334	8	13	15	18	21	28
2021-09-22	reported_cases	NA	estimate	18	18.3932	6.49397	9	14	16	19	22	30
2021-09-23	reported_cases	NA	estimate	17	17.984	6.39214	9	13	16	19	22	29
2021-09-24	reported_cases	NA	estimate	18	18.3663	6.24851	9	14	16	19	22	29
2021-09-25	reported_cases	NA	estimate	19	19.6447	6.57623	10	15	17	21	24	31
2021-09-26	reported_cases	NA	estimate	19	19.151	6.62648	9	14	17	20	23	31
2021-09-27	reported_cases	NA	estimate	16	16.5227	5.92269	8	12	15	17	20	27
2021-09-28	reported_cases	NA	estimate	22	22.3682	7.50888	11	17	20	24	27	36
2021-09-29	reported_cases	NA	estimate	23	24.1528	7.93651	13	18	21	25	29	38
2021-09-30	reported_cases	NA	estimate	24	24.7523	8.09659	13	19	22	26	30	39
2021-10-01	reported_cases	NA	estimate	25	25.9875	8.5027	14	20	23	27	31	41
2021-10-02	reported_cases	NA	estimate	28	28.32	8.93208	15	22	25	30	34	44
2021-10-03	reported_cases	NA	estimate	27	28.2995	9.01721	15	22	25	30	34	44
2021-10-04	reported_cases	NA	estimate	25	25.232	8.10553	13	20	23	27	30	40
2021-10-05	reported_cases	NA	estimate	33	34.385	10.5362	19	27	31	36	41	53
2021-10-06	reported_cases	NA	estimate	38	38.3905	11.5704	21	30	35	40	45	59
2021-10-07	reported_cases	NA	estimate	38	39.4177	12.0336	22	31	36	41	46	61
2021-10-08	reported_cases	NA	estimate	41	41.732	12.1126	24	33	38	44	49	63
2021-10-09	reported_cases	NA	estimate	44	45.3375	13.5926	26	36	41	47	53	70
2021-10-10	reported_cases	NA	estimate	44	45.4423	13.4402	26	36	41	47	53	70
2021-10-11	reported_cases	NA	estimate	39	40.2503	12.0006	23	32	36	42	47	61
2021-10-12	reported_cases	NA	estimate	53	54.7775	15.7802	32	44	50	57	64	83
2021-10-13	reported_cases	NA	estimate	60	61.8468	17.5146	36	49	56	64	72	93
2021-10-14	reported_cases	NA	estimate	60	62.303	17.5036	36	50	56.6	65	73	93
2021-10-15	reported_cases	NA	estimate	64	65.901	18.3351	39	53	60	69	77	99
2021-10-16	reported_cases	NA	estimate	69	70.9682	19.2455	43	57	64	74	83	104
2021-10-17	reported_cases	NA	estimate	69	70.902	19.6582	42	57	65	74	82.25	107
2021-10-18	reported_cases	NA	estimate	61	62.2195	17.6325	36	50	57	65	73	93
2021-10-19	reported_cases	NA	estimate	82	84.4405	22.967	51	68	76	89	100	125
2021-10-20	reported_cases	NA	estimate	90	92.0793	24.6965	55	75	84	96	107	136
2021-10-21	reported_cases	NA	estimate	92	93.2975	25.2124	56.95	75	85	98	109	137
2021-10-22	reported_cases	NA	estimate	93	95.9955	26.4083	57	77.75	87	100	112	144
2021-10-23	reported_cases	NA	estimate	100	102.728	27.6375	61	83.75	94	108	120	151.05
2021-10-24	reported_cases	NA	estimate	98	100.887	26.9549	60	82	92	106	118	149
2021-10-25	reported_cases	NA	estimate	85	87.4543	23.9176	52	70	80	91	103	130
2021-10-26	reported_cases	NA	estimate	113	115.257	31.4415	69	93	105	120	134	170
2021-10-27	reported_cases	NA	estimate	121	124.408	33.2893	76	101	114	130	146	184
2021-10-28	reported_cases	NA	estimate	122	124.361	32.7807	76	101	114	130	144	183
2021-10-29	reported_cases	NA	estimate	124	127.75	34.4766	77.95	104	116	133	147	190
2021-10-30	reported_cases	NA	estimate	131	134.609	35.3773	83	110	122	140	155	199
2021-10-31	reported_cases	NA	estimate	129	132.185	34.863	81	109	121	137	153	194
2021-11-01	reported_cases	NA	estimate	111	112.938	30.2637	68.95	91	103	118	131	166
2021-11-02	reported_cases	NA	estimate	146	149.53	39.4793	92	122	137	157	174	218
2021-11-03	reported_cases	NA	estimate	156	159.663	41.3665	99	130	146	167	184	235
2021-11-04	reported_cases	NA	estimate	155	158.378	41.0871	98	129	145	165	183	232
2021-11-05	reported_cases	NA	estimate	156	160.111	42.6542	98	130	146	167	185	236
2021-11-06	reported_cases	NA	estimate	163	167.811	44.5147	102	138	153	174	194	247
2021-11-07	reported_cases	NA	estimate	158.5	161.624	42.513	98	132	148	169	187	236
2021-11-08	reported_cases	NA	estimate	133	136.946	36.734	83	111	125	143	159	202
2021-11-09	reported_cases	NA	estimate	176	179.982	47.981	110	146	165	188	209	265
2021-11-10	reported_cases	NA	estimate	185	189.905	48.6105	120	156	174	197	219	276
2021-11-11	reported_cases	NA	estimate	181	185.708	48.336	114.95	152	169	193	216	272
2021-11-12	reported_cases	NA	estimate	184	188.936	50.9384	115	153	171	197	218	281
2021-11-13	reported_cases	NA	estimate	188	193.693	51.0763	118	158	176.6	201	225	284
2021-11-14	reported_cases	NA	estimate	181	185.322	47.417	116	152	169	194	214	269
2021-11-15	reported_cases	NA	estimate	153	155.995	40.6263	96	127	143	163	181	227
2021-11-16	reported_cases	NA	estimate	194	199.646	52.4877	124	163	182	207	230	294
2021-11-17	reported_cases	NA	estimate	203	207.799	54.897	125.95	170	190	217	240	307.05
2021-11-18	reported_cases	NA	estimate	195	198.503	51.1001	122	163	183	208	228	287.05
2021-11-19	reported_cases	NA	estimate	192	196.397	51.246	123	160.75	179	205	227	287
2021-11-20	reported_cases	NA	estimate	193	197.554	50.7982	122	161	181	207	229	286
2021-11-21	reported_cases	NA	estimate	179	183.621	47.6528	112	149	168	192	213	268
2021-11-22	reported_cases	NA	estimate	146	149.297	38.8962	91	123	137	155	173	217
2021-11-23	reported_cases	NA	estimate	183	187.927	50.2359	115	153	171	196	218	278
2021-11-24	reported_cases	NA	estimate	184	186.999	48.9147	114	153	172	195	216	274
2021-11-25	reported_cases	NA	estimate	172	174.915	45.5925	107.95	142	160	182	203	255
2021-11-26	reported_cases	NA	estimate	163	167.28	43.0998	103	137	153	175	193	244
2021-11-27	reported_cases	NA	estimate	160	163.137	41.8624	100	134.75	150	170.4	189	237.05
2021-11-28	reported_cases	NA	estimate	144	147.791	39.4903	89	120	135	154	172	217
2021-11-29	reported_cases	NA	estimate	116	117.671	31.1892	71	96	108	123	137	173
2021-11-30	reported_cases	NA	estimate	140	142.296	37.0724	87	116	130	149	165	208
2021-12-01	reported_cases	NA	estimate	137	140.323	37.2492	87	114	128	146	162	209
2021-12-02	reported_cases	NA	estimate	126	128.774	33.8822	80	105	117	134	150	187
2021-12-03	reported_cases	NA	estimate	118	121.174	32.531	74	98	111	126	141	178
2021-12-04	reported_cases	NA	estimate	115	118.372	31.3615	72	97	108	124	137	174
2021-12-05	reported_cases	NA	estimate	105	107.18	28.4599	65	87	98	112	124	157.05
2021-12-06	reported_cases	NA	estimate	83	84.898	22.9594	50.95	69	77	88	98	126
2021-12-07	reported_cases	NA	estimate	100	102.385	27.337	62	83	94	107	119	150
2021-12-08	reported_cases	NA	estimate	101	102.82	27.0413	63	83	94	107	119	151
2021-12-09	reported_cases	NA	estimate	91	93.9055	25.8374	55.95	76	86	98	109	139
2021-12-10	reported_cases	NA	estimate	87	89.0065	24.4415	53	72	81	93	104	132
2021-12-11	reported_cases	NA	estimate	85	86.8465	23.68	52	71	79	91	101	129
2021-12-12	reported_cases	NA	estimate	77	79.0948	22.0127	46	64	72	83	92	118
2021-12-13	reported_cases	NA	estimate	62	62.8077	17.3678	37	50	57	66	73	94
2021-12-14	reported_cases	NA	estimate	75	76.3775	21.3142	45	61	69	80	89	114
2021-12-15	reported_cases	NA	estimate	75	76.0345	20.4505	46	62	70	79	88	112
2021-12-16	reported_cases	NA	estimate	69	69.8558	19.1216	41.95	56	64	73	81	104
2021-12-17	reported_cases	NA	estimate	65	66.9193	19.0488	39	54	61	70	78	101
2021-12-18	reported_cases	NA	estimate	64	65.1683	18.2831	38	52	59	68	76	98
2021-12-19	reported_cases	NA	estimate	57	58.431	16.5189	34	47	53	61	68	88
2021-12-20	reported_cases	NA	estimate	46	47.1683	13.5339	27	38	43	50	56	70.05
2021-12-21	reported_cases	NA	estimate	56	57.358	16.2674	33	46	52	60	67	87
2021-12-22	reported_cases	NA	estimate	56	57.85	16.5729	34	46	52	60	67	88
2021-12-23	reported_cases	NA	estimate	52	53.5925	15.2182	31	43	48	57	63	80
2021-12-24	reported_cases	NA	estimate	50	51.1215	14.6535	29	41	46	53	60	77
2021-12-25	reported_cases	NA	estimate	49	50.3143	14.8258	29	40	45	53	60	76
2021-12-26	reported_cases	NA	estimate	44	45.8325	13.5854	26	36	41	48	54	69
2021-12-27	reported_cases	NA	estimate	36	36.6525	11.1267	21	29	33	38	43	56
2021-12-28	reported_cases	NA	estimate	44	45.049	13.1953	26	36	41	47	53	69
2021-12-29	reported_cases	NA	estimate	44	45.4995	13.3427	25	36	41	48	54	69
2021-12-30	reported_cases	NA	estimate	41	42.0333	12.3421	24	33	38	44	50	64
2021-12-31	reported_cases	NA	estimate	39	40.2245	12.0769	22	32	36	42	48	61
2022-01-01	reported_cases	NA	estimate	39	39.7525	12.0798	22	31	36	42	47	62
2022-01-02	reported_cases	NA	estimate	35	36.1968	10.8323	20	29	33	38	43	55.05
2022-01-03	reported_cases	NA	estimate	28	28.567	8.81751	15	22	26	30	34	44
2022-01-04	reported_cases	NA	estimate	34	35.238	10.7707	19	27	32	37	42	54
2022-01-05	reported_cases	NA	estimate	34	35.3738	10.6886	19	28	32	37	42	54
2022-01-06	reported_cases	NA	estimate	31	32.4625	10.0912	18	25	29	34	38	51
2022-01-07	reported_cases	NA	estimate	30	30.9428	9.62573	17	24	28	32	37	48
2022-01-08	reported_cases	NA	estimate	29	30.3115	9.4332	16	24	27	32	36	47
2022-01-09	reported_cases	NA	estimate	27	27.626	8.89665	14.95	21	25	29	33	43
2022-01-10	reported_cases	NA	estimate based on partial data	21	21.9267	7.30327	11	17	19.6	23	26	35
2022-01-11	reported_cases	NA	estimate based on partial data	26	27.2628	8.88738	14	21	24	28.4	32.25	43
2022-01-12	reported_cases	NA	estimate based on partial data	27	27.543	8.98295	14	21	25	29	33	44
2022-01-13	reported_cases	NA	estimate based on partial data	25	25.7087	8.48872	13	20	23	27	31	41
2022-01-14	reported_cases	NA	estimate based on partial data	25	25.1685	8.24986	13	19	23	26	30	40
2022-01-15	reported_cases	NA	estimate based on partial data	25	25.3837	8.32534	13	20	23	27	30	40
2022-01-16	reported_cases	NA	estimate based on partial data	23	23.5425	8.05034	12	18	21	25	28	38
2022-01-17	reported_cases	NA	estimate based on partial data	19	19.8923	7.08104	10	15	17	21	24	33
2022-01-18	reported_cases	NA	estimate based on partial data	25	26.0505	9.87038	13	19	22	27	32	44
NA	day_of_week	Friday	NA	1.01898	1.02048	0.0574204	0.92952	0.982097	1.00394	1.03279	1.05628	1.11884
NA	day_of_week	Monday	NA	0.81285	0.813537	0.0447453	0.741487	0.782901	0.800613	0.824211	0.843279	0.887443
NA	day_of_week	Saturday	NA	1.03876	1.04057	0.056774	0.949669	1.00195	1.02516	1.05299	1.07724	1.13594
NA	day_of_week	Sunday	NA	0.978884	0.980578	0.0537951	0.894807	0.943083	0.965288	0.993197	1.01649	1.06951
NA	day_of_week	Thursday	NA	1.03074	1.0317	0.0542687	0.945275	0.994674	1.01737	1.04355	1.06696	1.12286
NA	day_of_week	Tuesday	NA	1.03497	1.03736	0.0567895	0.94662	0.999463	1.02149	1.04978	1.07327	1.13178
NA	day_of_week	Wednesday	NA	1.07484	1.07577	0.0557243	0.984898	1.03799	1.06093	1.08909	1.11202	1.16839
NA	delay_mean	1	NA	1.62104	1.62101	0.00499705	1.61281	1.61772	1.61979	1.62233	1.62429	1.62903
NA	delay_mean	2	NA	0.988006	0.987961	0.00678236	0.976919	0.98344	0.986251	0.989753	0.992614	0.99879
NA	delay_sd	1	NA	0.417955	0.417908	0.00538445	0.408882	0.414328	0.416639	0.419209	0.421367	0.426698
NA	delay_sd	2	NA	0.846885	0.846813	0.0047781	0.839067	0.843462	0.845504	0.848123	0.85007	0.854721
NA	gt_mean	NA	NA	3.63514	3.63561	0.0572904	3.54369	3.59579	3.6195	3.65044	3.6752	3.72954
NA	gt_sd	NA	NA	3.07792	3.07813	0.0619996	2.97747	3.03587	3.06188	3.09295	3.12014	3.17989
NA	reporting_overdispersion	NA	NA	0.00272124	0.00314536	0.00175721	0.00113519	0.00192215	0.0023885	0.00314614	0.00393818	0.00644165

## Sheet: shorter mean GT
date	variable	strat	type	median	mean	sd	lower_90	lower_50	lower_20	upper_20	upper_50	upper_90
2021-08-17	R	NA	estimate	1.24913	1.47101	0.657947	0.819003	0.988278	1.12816	1.41674	1.76143	2.85109
2021-08-18	R	NA	estimate	1.18595	1.333	0.477238	0.815813	0.966786	1.08477	1.31449	1.59262	2.29942
2021-08-19	R	NA	estimate	1.12456	1.21017	0.333968	0.811217	0.945199	1.04256	1.22034	1.42664	1.86261
2021-08-20	R	NA	estimate	1.0626	1.10291	0.222841	0.807285	0.923696	1.00085	1.13128	1.26215	1.50893
2021-08-21	R	NA	estimate	1.00127	1.01095	0.140278	0.803283	0.900238	0.958265	1.04209	1.11411	1.2487
2021-08-22	R	NA	estimate	0.93142	0.933548	0.0858693	0.798553	0.872206	0.907929	0.954694	0.991546	1.07931
2021-08-23	R	NA	estimate	0.870455	0.869595	0.0639912	0.763907	0.829602	0.854683	0.886172	0.910912	0.972624
2021-08-24	R	NA	estimate	0.829012	0.817852	0.0696368	0.671765	0.785988	0.814971	0.841857	0.862396	0.910858
2021-08-25	R	NA	estimate	0.798969	0.777096	0.0832125	0.596799	0.745757	0.781831	0.812932	0.832008	0.872863
2021-08-26	R	NA	estimate	0.775352	0.746224	0.0945908	0.54551	0.701776	0.75588	0.791627	0.813996	0.851394
2021-08-27	R	NA	estimate	0.756395	0.724309	0.101454	0.51726	0.666831	0.730181	0.776377	0.801081	0.838838
2021-08-28	R	NA	estimate	0.741348	0.710603	0.103628	0.506177	0.643473	0.710986	0.764542	0.792055	0.83096
2021-08-29	R	NA	estimate	0.730228	0.70452	0.101429	0.511027	0.634599	0.699671	0.755059	0.786421	0.829091
2021-08-30	R	NA	estimate	0.725153	0.705585	0.0953387	0.530057	0.635109	0.694903	0.752029	0.783344	0.829636
2021-08-31	R	NA	estimate	0.726026	0.713359	0.0860949	0.561611	0.648474	0.696887	0.751389	0.784107	0.832256
2021-09-01	R	NA	estimate	0.733935	0.727352	0.0750329	0.600631	0.669604	0.708886	0.756005	0.788788	0.836697
2021-09-02	R	NA	estimate	0.749833	0.746922	0.0646208	0.638031	0.698414	0.729962	0.768712	0.797891	0.84479
2021-09-03	R	NA	estimate	0.77221	0.771189	0.0586563	0.673596	0.730796	0.756719	0.78916	0.813859	0.860305
2021-09-04	R	NA	estimate	0.798778	0.799004	0.0601552	0.706984	0.759185	0.783336	0.812464	0.834494	0.889501
2021-09-05	R	NA	estimate	0.822438	0.828993	0.0676945	0.736631	0.78669	0.809106	0.836146	0.85966	0.945798
2021-09-06	R	NA	estimate	0.846562	0.859698	0.0767812	0.767125	0.813189	0.834967	0.860607	0.885779	1.01232
2021-09-07	R	NA	estimate	0.872466	0.889774	0.0836972	0.794581	0.838876	0.859304	0.885283	0.911489	1.06691
2021-09-08	R	NA	estimate	0.896881	0.918177	0.0866741	0.823478	0.863774	0.883535	0.911081	0.942941	1.10348
2021-09-09	R	NA	estimate	0.921866	0.944284	0.0856129	0.849462	0.888382	0.908281	0.935626	0.974407	1.12548
2021-09-10	R	NA	estimate	0.946263	0.967902	0.0815543	0.874381	0.912755	0.931671	0.961731	1.00254	1.13212
2021-09-11	R	NA	estimate	0.969647	0.989192	0.0761254	0.898264	0.937087	0.955871	0.9872	1.02612	1.13727
2021-09-12	R	NA	estimate	0.991899	1.00854	0.0709788	0.920622	0.959274	0.978273	1.00899	1.04592	1.14653
2021-09-13	R	NA	estimate	1.01211	1.02645	0.0672477	0.940827	0.980672	0.999542	1.02999	1.06392	1.15644
2021-09-14	R	NA	estimate	1.03243	1.04342	0.065187	0.956128	1.00114	1.01971	1.04977	1.08067	1.16259
2021-09-15	R	NA	estimate	1.05302	1.05988	0.0642603	0.96809	1.02002	1.03986	1.06921	1.0975	1.1744
2021-09-16	R	NA	estimate	1.07181	1.07618	0.0636238	0.982227	1.03865	1.05919	1.08658	1.11274	1.18417
2021-09-17	R	NA	estimate	1.09049	1.09254	0.06262	0.994602	1.05689	1.07742	1.10411	1.13037	1.19642
2021-09-18	R	NA	estimate	1.10825	1.10904	0.061032	1.01295	1.0744	1.09486	1.12153	1.14751	1.207
2021-09-19	R	NA	estimate	1.12599	1.12563	0.0591056	1.02966	1.09085	1.11296	1.13914	1.16107	1.22052
2021-09-20	R	NA	estimate	1.14351	1.14211	0.0573939	1.04952	1.10775	1.12978	1.15559	1.17601	1.23654
2021-09-21	R	NA	estimate	1.15864	1.15817	0.0564529	1.06726	1.12405	1.14544	1.17099	1.19142	1.25226
2021-09-22	R	NA	estimate	1.1736	1.17343	0.0564953	1.08424	1.13863	1.15981	1.18593	1.20667	1.26748
2021-09-23	R	NA	estimate	1.18649	1.18746	0.0572431	1.09845	1.15209	1.17323	1.19897	1.22158	1.28112
2021-09-24	R	NA	estimate	1.19822	1.19991	0.0581017	1.1093	1.16468	1.18516	1.21135	1.2331	1.29377
2021-09-25	R	NA	estimate	1.20786	1.21049	0.0584926	1.12037	1.17532	1.19549	1.22144	1.2428	1.30537
2021-09-26	R	NA	estimate	1.21653	1.21905	0.0581097	1.12778	1.18397	1.20425	1.22899	1.25107	1.31286
2021-09-27	R	NA	estimate	1.22378	1.22561	0.0570093	1.13818	1.19082	1.21221	1.23572	1.25748	1.3202
2021-09-28	R	NA	estimate	1.22948	1.23027	0.0555359	1.14366	1.19708	1.2174	1.24093	1.26195	1.32288
2021-09-29	R	NA	estimate	1.23261	1.23326	0.0541272	1.14748	1.20037	1.22097	1.24416	1.26535	1.32267
2021-09-30	R	NA	estimate	1.23415	1.23482	0.0530953	1.14954	1.20183	1.22254	1.2466	1.26582	1.32038
2021-10-01	R	NA	estimate	1.23507	1.2352	0.0525059	1.15054	1.20346	1.22318	1.24634	1.26615	1.31987
2021-10-02	R	NA	estimate	1.23503	1.23464	0.0522116	1.14956	1.20419	1.22253	1.24513	1.26481	1.31727
2021-10-03	R	NA	estimate	1.23317	1.23329	0.0519826	1.14953	1.20314	1.22161	1.24409	1.26365	1.3172
2021-10-04	R	NA	estimate	1.23151	1.23126	0.051635	1.1469	1.20165	1.22012	1.24267	1.26102	1.3146
2021-10-05	R	NA	estimate	1.22878	1.22861	0.0510981	1.14391	1.1988	1.21726	1.23992	1.25792	1.3127
2021-10-06	R	NA	estimate	1.22565	1.22533	0.0504149	1.14197	1.19616	1.21469	1.23652	1.2543	1.30828
2021-10-07	R	NA	estimate	1.22085	1.22141	0.0497003	1.14017	1.19274	1.21007	1.23222	1.25018	1.30366
2021-10-08	R	NA	estimate	1.21578	1.21681	0.0490905	1.13593	1.18817	1.20547	1.22722	1.24467	1.29768
2021-10-09	R	NA	estimate	1.21113	1.21152	0.0486975	1.13241	1.18348	1.20103	1.22112	1.23867	1.2931
2021-10-10	R	NA	estimate	1.20533	1.20554	0.0485615	1.12702	1.17751	1.19489	1.21489	1.23194	1.28549
2021-10-11	R	NA	estimate	1.19868	1.19894	0.0486094	1.12316	1.17104	1.18717	1.20867	1.22493	1.28129
2021-10-12	R	NA	estimate	1.19106	1.19181	0.0486582	1.11652	1.16284	1.18028	1.20142	1.21819	1.2732
2021-10-13	R	NA	estimate	1.18382	1.18429	0.0484915	1.11005	1.15567	1.17324	1.19399	1.21041	1.26399
2021-10-14	R	NA	estimate	1.17627	1.17658	0.0479779	1.10112	1.14832	1.16591	1.18685	1.20323	1.2546
2021-10-15	R	NA	estimate	1.16904	1.16886	0.0471559	1.09344	1.14044	1.15907	1.17973	1.1954	1.24625
2021-10-16	R	NA	estimate	1.16279	1.16133	0.0462275	1.08476	1.13396	1.15151	1.17233	1.18818	1.23422
2021-10-17	R	NA	estimate	1.15606	1.15419	0.0454568	1.0775	1.12797	1.14593	1.16554	1.18109	1.22351
2021-10-18	R	NA	estimate	1.14964	1.14755	0.0450296	1.07105	1.12135	1.1397	1.15915	1.17489	1.21698
2021-10-19	R	NA	estimate	1.14363	1.14149	0.0449591	1.06439	1.11534	1.13321	1.15335	1.16843	1.21071
2021-10-20	R	NA	estimate	1.13803	1.13604	0.0450933	1.06036	1.10949	1.12755	1.14773	1.16233	1.20672
2021-10-21	R	NA	estimate	1.13262	1.13114	0.0452129	1.05683	1.10483	1.12251	1.14226	1.15761	1.20261
2021-10-22	R	NA	estimate	1.12814	1.12672	0.0451519	1.05191	1.10026	1.11789	1.13833	1.15233	1.19915
2021-10-23	R	NA	estimate	1.1235	1.12267	0.0448721	1.04727	1.09641	1.11386	1.13386	1.14892	1.1949
2021-10-24	R	NA	estimate	1.11991	1.11886	0.0444622	1.04439	1.09375	1.10937	1.12926	1.14483	1.1893
2021-10-25	R	NA	estimate	1.11642	1.11517	0.0440676	1.0412	1.09007	1.10611	1.12521	1.14093	1.18774
2021-10-26	R	NA	estimate	1.11177	1.11148	0.0437916	1.03904	1.08614	1.10256	1.12164	1.13677	1.183
2021-10-27	R	NA	estimate	1.10781	1.10768	0.0436319	1.03525	1.08291	1.09853	1.11722	1.13212	1.17854
2021-10-28	R	NA	estimate	1.10367	1.10371	0.0434975	1.0338	1.07908	1.09461	1.11256	1.12793	1.17515
2021-10-29	R	NA	estimate	1.09894	1.0995	0.0432896	1.02894	1.07471	1.09057	1.10797	1.1239	1.16953
2021-10-30	R	NA	estimate	1.09476	1.09502	0.0429823	1.02797	1.07001	1.08625	1.10358	1.11897	1.1642
2021-10-31	R	NA	estimate	1.09007	1.09027	0.0426477	1.02229	1.06547	1.08123	1.09906	1.11333	1.15986
2021-11-01	R	NA	estimate	1.08461	1.08523	0.0424076	1.01753	1.06014	1.07551	1.09361	1.10949	1.15476
2021-11-02	R	NA	estimate	1.07857	1.0799	0.042341	1.01406	1.05492	1.06935	1.0879	1.10377	1.14973
2021-11-03	R	NA	estimate	1.07263	1.07422	0.0424176	1.00778	1.04859	1.06372	1.08176	1.09804	1.14598
2021-11-04	R	NA	estimate	1.06647	1.06815	0.0425181	1.00118	1.04253	1.05728	1.07601	1.09239	1.14017
2021-11-05	R	NA	estimate	1.05921	1.0616	0.04253	0.997178	1.03463	1.05034	1.0695	1.08606	1.13385
2021-11-06	R	NA	estimate	1.05186	1.05447	0.0424381	0.991101	1.02735	1.04231	1.06131	1.07903	1.12706
2021-11-07	R	NA	estimate	1.04383	1.04663	0.0423429	0.984312	1.01932	1.03395	1.05325	1.07083	1.1198
2021-11-08	R	NA	estimate	1.03447	1.038	0.0423881	0.977441	1.01033	1.02518	1.04408	1.06251	1.11382
2021-11-09	R	NA	estimate	1.02451	1.02845	0.0426441	0.967839	1.00027	1.0148	1.03383	1.05186	1.10577
2021-11-10	R	NA	estimate	1.01339	1.01794	0.0430284	0.957237	0.989302	1.00462	1.0235	1.0406	1.09441
2021-11-11	R	NA	estimate	1.00176	1.00643	0.0433256	0.945559	0.97823	0.992467	1.01102	1.02885	1.08487
2021-11-12	R	NA	estimate	0.989306	0.99395	0.0432904	0.932804	0.9665	0.980865	0.998542	1.01656	1.07096
2021-11-13	R	NA	estimate	0.97639	0.980613	0.0427675	0.918904	0.954101	0.968177	0.985384	1.00204	1.05763
2021-11-14	R	NA	estimate	0.962966	0.966601	0.0417749	0.90456	0.940415	0.955565	0.971742	0.988645	1.04061
2021-11-15	R	NA	estimate	0.949881	0.952167	0.0405233	0.889001	0.927771	0.94194	0.958257	0.973572	1.02184
2021-11-16	R	NA	estimate	0.936893	0.937625	0.0393593	0.876353	0.914282	0.928798	0.944864	0.958971	1.0069
2021-11-17	R	NA	estimate	0.923894	0.923318	0.0386307	0.860852	0.900867	0.915568	0.931702	0.944862	0.987219
2021-11-18	R	NA	estimate	0.910955	0.909597	0.0385251	0.844561	0.887835	0.90302	0.918889	0.932102	0.97032
2021-11-19	R	NA	estimate	0.898935	0.896793	0.0389851	0.829193	0.875034	0.890714	0.90713	0.9206	0.955712
2021-11-20	R	NA	estimate	0.888619	0.885194	0.0397591	0.814456	0.862876	0.879926	0.896734	0.910515	0.943747
2021-11-21	R	NA	estimate	0.879184	0.875034	0.0405301	0.80201	0.853404	0.86985	0.887387	0.900841	0.933759
2021-11-22	R	NA	estimate	0.870857	0.86648	0.0410257	0.791703	0.845247	0.861662	0.879227	0.893085	0.924251
2021-11-23	R	NA	estimate	0.864621	0.859631	0.0410764	0.783336	0.838124	0.855047	0.872759	0.88624	0.91785
2021-11-24	R	NA	estimate	0.858937	0.854511	0.040642	0.779217	0.832746	0.850105	0.867673	0.881075	0.911837
2021-11-25	R	NA	estimate	0.855051	0.851074	0.0398204	0.77796	0.829503	0.846207	0.863832	0.877013	0.907944
2021-11-26	R	NA	estimate	0.852876	0.849208	0.0388395	0.779216	0.826842	0.843795	0.861346	0.87408	0.906503
2021-11-27	R	NA	estimate	0.851318	0.848739	0.0380144	0.781808	0.826626	0.842897	0.859627	0.872229	0.906065
2021-11-28	R	NA	estimate	0.851349	0.849441	0.0376547	0.784651	0.827245	0.842916	0.859522	0.8722	0.906811
2021-11-29	R	NA	estimate	0.851644	0.851054	0.037933	0.787616	0.828176	0.843408	0.859751	0.872748	0.909815
2021-11-30	R	NA	estimate	0.85239	0.853297	0.0387863	0.792236	0.829606	0.844396	0.86057	0.874929	0.917394
2021-12-01	R	NA	estimate	0.854352	0.855891	0.0399323	0.795523	0.831682	0.84555	0.862104	0.8766	0.924872
2021-12-02	R	NA	estimate	0.855569	0.858588	0.0409984	0.798521	0.834017	0.847626	0.86395	0.878657	0.930673
2021-12-03	R	NA	estimate	0.857374	0.861186	0.0416771	0.801115	0.836158	0.849333	0.866153	0.881018	0.933657
2021-12-04	R	NA	estimate	0.859462	0.863554	0.0418312	0.802118	0.839288	0.852153	0.868386	0.883019	0.937665
2021-12-05	R	NA	estimate	0.862555	0.865636	0.0415271	0.804763	0.841142	0.854142	0.870981	0.885573	0.938983
2021-12-06	R	NA	estimate	0.864842	0.867444	0.0410018	0.808043	0.842344	0.856495	0.873164	0.888568	0.938737
2021-12-07	R	NA	estimate	0.866569	0.869049	0.040571	0.808333	0.84407	0.858397	0.875666	0.890913	0.938237
2021-12-08	R	NA	estimate	0.868863	0.870554	0.0404968	0.807998	0.846263	0.860355	0.87772	0.891974	0.938532
2021-12-09	R	NA	estimate	0.870445	0.872075	0.0408648	0.809022	0.847981	0.861921	0.879213	0.894433	0.939995
2021-12-10	R	NA	estimate	0.872429	0.873713	0.0415515	0.809739	0.849357	0.863527	0.881209	0.896235	0.944011
2021-12-11	R	NA	estimate	0.874468	0.875545	0.0423071	0.808493	0.851639	0.865471	0.883586	0.898727	0.946613
2021-12-12	R	NA	estimate	0.877019	0.877612	0.0428902	0.810389	0.853734	0.867786	0.886078	0.901309	0.948924
2021-12-13	R	NA	estimate	0.879089	0.879915	0.0431661	0.811734	0.85534	0.870328	0.888127	0.904362	0.949347
2021-12-14	R	NA	estimate	0.881286	0.882411	0.0431343	0.815976	0.858401	0.872539	0.890221	0.906927	0.953607
2021-12-15	R	NA	estimate	0.884087	0.88502	0.0428962	0.819676	0.86023	0.874665	0.893099	0.908964	0.955758
2021-12-16	R	NA	estimate	0.886401	0.887627	0.0425967	0.822857	0.862223	0.876603	0.895825	0.911607	0.957331
2021-12-17	R	NA	estimate	0.887635	0.890092	0.0423639	0.825469	0.86475	0.87859	0.898129	0.914227	0.961162
2021-12-18	R	NA	estimate	0.889885	0.892264	0.0422724	0.827899	0.866427	0.880406	0.899777	0.916268	0.965363
2021-12-19	R	NA	estimate	0.891167	0.894004	0.042342	0.829518	0.867585	0.882279	0.901266	0.917997	0.966987
2021-12-20	R	NA	estimate	0.892198	0.895198	0.0425651	0.831516	0.868559	0.883406	0.901893	0.919268	0.967348
2021-12-21	R	NA	estimate	0.892898	0.895774	0.0429342	0.83105	0.869272	0.883505	0.903028	0.920045	0.967152
2021-12-22	R	NA	estimate	0.89277	0.895713	0.0434422	0.829934	0.868194	0.883824	0.902829	0.919973	0.969075
2021-12-23	R	NA	estimate	0.892789	0.895048	0.0440532	0.828894	0.867131	0.8838	0.902221	0.919647	0.971075
2021-12-24	R	NA	estimate	0.892236	0.893866	0.0446854	0.824334	0.866423	0.882831	0.901657	0.918416	0.968274
2021-12-25	R	NA	estimate	0.891078	0.8923	0.0452411	0.82005	0.865077	0.881968	0.901408	0.917215	0.967275
2021-12-26	R	NA	estimate	0.890554	0.890523	0.0456722	0.816691	0.863947	0.880281	0.90044	0.916314	0.96691
2021-12-27	R	NA	estimate	0.889853	0.888737	0.0460275	0.811888	0.861547	0.879563	0.899723	0.915485	0.961749
2021-12-28	R	NA	estimate	0.889493	0.88716	0.0464433	0.807257	0.860121	0.879208	0.89908	0.914784	0.960225
2021-12-29	R	NA	estimate	0.889062	0.886016	0.0470765	0.803574	0.858405	0.877889	0.899112	0.915109	0.957813
2021-12-30	R	NA	estimate	0.888691	0.885514	0.0480195	0.801461	0.857846	0.877187	0.899741	0.916154	0.958372
2021-12-31	R	NA	estimate	0.889649	0.885838	0.0492474	0.798225	0.857587	0.877929	0.900746	0.917196	0.961501
2022-01-01	R	NA	estimate	0.890536	0.887142	0.0506305	0.797666	0.858921	0.878957	0.902502	0.91936	0.96442
2022-01-02	R	NA	estimate	0.892843	0.88955	0.0520127	0.798517	0.859941	0.881456	0.904807	0.922959	0.969093
2022-01-03	R	NA	estimate	0.896069	0.893158	0.0533247	0.80138	0.861304	0.883892	0.908374	0.927245	0.975504
2022-01-04	R	NA	estimate	0.900387	0.898041	0.0547028	0.804747	0.865982	0.887362	0.912785	0.932526	0.98327
2022-01-05	R	NA	estimate	0.906354	0.904263	0.0565826	0.808599	0.868845	0.892865	0.918626	0.940071	0.993
2022-01-06	R	NA	estimate	0.912068	0.911872	0.0597271	0.813948	0.873394	0.898743	0.926597	0.949969	1.00788
2022-01-07	R	NA	estimate	0.920498	0.920909	0.0651285	0.818517	0.878708	0.905114	0.934888	0.962364	1.0279
2022-01-08	R	NA	estimate	0.928911	0.931398	0.0737671	0.814556	0.882992	0.911683	0.946997	0.978434	1.05619
2022-01-09	R	NA	estimate	0.937859	0.943347	0.0863734	0.808749	0.885103	0.918591	0.959088	0.997836	1.0936
2022-01-10	R	NA	estimate based on partial data	0.947923	0.956748	0.103384	0.800913	0.888123	0.924346	0.971409	1.01887	1.14173
2022-01-11	R	NA	estimate based on partial data	0.957603	0.971581	0.125083	0.791795	0.887703	0.930953	0.986466	1.04324	1.20234
2022-01-12	R	NA	estimate based on partial data	0.965636	0.987814	0.151767	0.778116	0.88589	0.936009	0.999068	1.06847	1.2756
2022-01-13	R	NA	estimate based on partial data	0.974339	1.00541	0.183865	0.76393	0.883572	0.938844	1.01361	1.09369	1.35761
2022-01-14	R	NA	estimate based on partial data	0.981429	1.02433	0.222035	0.747214	0.881761	0.942352	1.02623	1.11911	1.44682
2022-01-15	R	NA	estimate based on partial data	0.98724	1.04453	0.267278	0.731063	0.877958	0.944439	1.03905	1.14664	1.55338
2022-01-16	R	NA	estimate based on partial data	0.992471	1.06598	0.321073	0.715139	0.873914	0.946025	1.0496	1.16725	1.67511
2022-01-17	R	NA	estimate based on partial data	0.998986	1.08867	0.38547	0.698218	0.869286	0.94606	1.05933	1.18933	1.79139
2022-01-18	R	NA	estimate based on partial data	1.00376	1.11263	0.463144	0.678142	0.865762	0.944717	1.06974	1.21356	1.9119
2021-08-17	growth_rate	NA	estimate	0.0737496	0.120496	0.160364	-0.0590207	-0.00364701	0.0393246	0.120693	0.208167	0.444078
2021-08-18	growth_rate	NA	estimate	0.0558743	0.0883917	0.124673	-0.0600057	-0.010423	0.0261046	0.0921381	0.166343	0.332782
2021-08-19	growth_rate	NA	estimate	0.0378186	0.0575681	0.0930141	-0.0613076	-0.017206	0.0132	0.0658147	0.122632	0.232305
2021-08-20	growth_rate	NA	estimate	0.0193392	0.0286362	0.0657486	-0.0631025	-0.0243862	0.000267925	0.0398471	0.077569	0.144604
2021-08-21	growth_rate	NA	estimate	0.000394255	0.00210685	0.0434734	-0.0645203	-0.0319966	-0.0131657	0.0130786	0.0349669	0.0737788
2021-08-22	growth_rate	NA	estimate	-0.0218611	-0.0216373	0.0276301	-0.0659714	-0.0410776	-0.0294718	-0.0142977	-0.00264703	0.0244611
2021-08-23	growth_rate	NA	estimate	-0.0415868	-0.0423459	0.0213512	-0.0783356	-0.055547	-0.0469875	-0.0365359	-0.0283063	-0.00865426
2021-08-24	growth_rate	NA	estimate	-0.0557363	-0.0598858	0.0243413	-0.111673	-0.0704329	-0.0603774	-0.0512869	-0.0443806	-0.0284085
2021-08-25	growth_rate	NA	estimate	-0.0657981	-0.0742164	0.0301072	-0.140199	-0.0844714	-0.0717364	-0.0609616	-0.0545371	-0.04092
2021-08-26	growth_rate	NA	estimate	-0.0740247	-0.0853636	0.0349773	-0.160092	-0.100072	-0.0810026	-0.0683187	-0.0607571	-0.0481349
2021-08-27	growth_rate	NA	estimate	-0.0807589	-0.0933994	0.0379799	-0.171714	-0.113475	-0.0901642	-0.0738279	-0.0651343	-0.0522256
2021-08-28	growth_rate	NA	estimate	-0.0862935	-0.0984284	0.0389672	-0.176713	-0.121826	-0.0971326	-0.0779714	-0.0683409	-0.0548724
2021-08-29	growth_rate	NA	estimate	-0.0899323	-0.100584	0.0380524	-0.174868	-0.125451	-0.101179	-0.0811888	-0.0701687	-0.0558054
2021-08-30	growth_rate	NA	estimate	-0.092027	-0.100033	0.0354853	-0.166763	-0.125061	-0.10312	-0.0825179	-0.0712268	-0.0553586
2021-08-31	growth_rate	NA	estimate	-0.0915702	-0.0969851	0.0316633	-0.154388	-0.120319	-0.102218	-0.0824806	-0.0709089	-0.0547174
2021-09-01	growth_rate	NA	estimate	-0.0887353	-0.0917097	0.0272115	-0.138775	-0.111854	-0.0979257	-0.0808647	-0.0693831	-0.0529887
2021-09-02	growth_rate	NA	estimate	-0.0831027	-0.084543	0.0230977	-0.124034	-0.101421	-0.0901996	-0.0765535	-0.0661045	-0.0501875
2021-09-03	growth_rate	NA	estimate	-0.0752595	-0.0758922	0.0205969	-0.110719	-0.0898832	-0.0806286	-0.0691502	-0.060738	-0.0452003
2021-09-04	growth_rate	NA	estimate	-0.0660265	-0.0662216	0.0205747	-0.0985588	-0.0798712	-0.0713917	-0.0612354	-0.0536696	-0.0352919
2021-09-05	growth_rate	NA	estimate	-0.0578937	-0.0560216	0.0224803	-0.0875976	-0.0701517	-0.0622985	-0.0532147	-0.0452445	-0.0169594
2021-09-06	growth_rate	NA	estimate	-0.04959	-0.0457643	0.0248887	-0.0766401	-0.0611456	-0.0536403	-0.044969	-0.0366336	0.00379501
2021-09-07	growth_rate	NA	estimate	-0.0411215	-0.0358544	0.0266678	-0.0676391	-0.0521248	-0.0454653	-0.0367788	-0.0282016	0.0206834
2021-09-08	growth_rate	NA	estimate	-0.0328922	-0.0265894	0.0272951	-0.0576952	-0.0438834	-0.037291	-0.0283845	-0.0181717	0.0316264
2021-09-09	growth_rate	NA	estimate	-0.0248961	-0.0181395	0.0267433	-0.0487561	-0.0358293	-0.0292524	-0.0203893	-0.00803696	0.0380296
2021-09-10	growth_rate	NA	estimate	-0.0169867	-0.0105501	0.0253198	-0.0404215	-0.027807	-0.0216744	-0.0120214	0.000791072	0.0403065
2021-09-11	growth_rate	NA	estimate	-0.00958632	-0.00376426	0.0235125	-0.0326854	-0.0198982	-0.0139036	-0.00397815	0.00807603	0.0415943
2021-09-12	growth_rate	NA	estimate	-0.00251345	0.00234464	0.0218266	-0.02535	-0.0128102	-0.00682198	0.00281566	0.0142167	0.0441831
2021-09-13	growth_rate	NA	estimate	0.00380319	0.00793803	0.0206108	-0.0186729	-0.00610309	-0.000145075	0.00934243	0.019588	0.0473462
2021-09-14	growth_rate	NA	estimate	0.0100673	0.0131822	0.0199332	-0.0138791	0.000352565	0.00613537	0.0154706	0.0248771	0.0489614
2021-09-15	growth_rate	NA	estimate	0.0163453	0.0182257	0.0196054	-0.00995513	0.00626507	0.0123177	0.0212893	0.0298682	0.052796
2021-09-16	growth_rate	NA	estimate	0.0221271	0.023184	0.0193457	-0.00562214	0.0119825	0.0181911	0.0265343	0.0344862	0.055384
2021-09-17	growth_rate	NA	estimate	0.0277703	0.0281301	0.0189452	-0.00170108	0.0175714	0.0237451	0.0319502	0.0397138	0.0590167
2021-09-18	growth_rate	NA	estimate	0.0331454	0.0330909	0.0183461	0.00403283	0.0228561	0.0290904	0.0371127	0.0445966	0.0622362
2021-09-19	growth_rate	NA	estimate	0.0384143	0.0380469	0.017638	0.00918489	0.0278567	0.0344384	0.0423605	0.0486094	0.0659452
2021-09-20	growth_rate	NA	estimate	0.0435158	0.0429374	0.0169987	0.0154004	0.0329049	0.0394624	0.0471434	0.0531171	0.0702894
2021-09-21	growth_rate	NA	estimate	0.0478683	0.0476693	0.0165959	0.0206947	0.0377382	0.0440641	0.0516339	0.057579	0.0750602
2021-09-22	growth_rate	NA	estimate	0.0523352	0.0521314	0.0164881	0.0258499	0.0420923	0.0482474	0.056039	0.0618943	0.079393
2021-09-23	growth_rate	NA	estimate	0.0560769	0.0562107	0.016591	0.0301288	0.0460421	0.0521857	0.0597355	0.066219	0.0832148
2021-09-24	growth_rate	NA	estimate	0.0594899	0.0598091	0.0167359	0.0335906	0.0497107	0.0556867	0.0632413	0.0695308	0.0865049
2021-09-25	growth_rate	NA	estimate	0.0623573	0.062857	0.0167656	0.0366473	0.0527344	0.0585899	0.0661997	0.0722773	0.089885
2021-09-26	growth_rate	NA	estimate	0.0647814	0.0653209	0.0166019	0.0388533	0.0552899	0.0612093	0.0683385	0.0746799	0.0923039
2021-09-27	growth_rate	NA	estimate	0.0669019	0.0672053	0.0162622	0.0418138	0.057401	0.0634627	0.0701607	0.0761372	0.0942365
2021-09-28	growth_rate	NA	estimate	0.0683645	0.0685474	0.0158358	0.0435922	0.0591415	0.0650209	0.071665	0.0775981	0.0947414
2021-09-29	growth_rate	NA	estimate	0.0692381	0.0694076	0.0154348	0.0447871	0.0600827	0.0660368	0.0726734	0.0785088	0.0943811
2021-09-30	growth_rate	NA	estimate	0.0698201	0.0698578	0.0151413	0.0454401	0.0608392	0.0665275	0.0731407	0.0789223	0.0944185
2021-10-01	growth_rate	NA	estimate	0.07006	0.0699708	0.0149753	0.0454828	0.0610328	0.0667312	0.0731432	0.0789135	0.093697
2021-10-02	growth_rate	NA	estimate	0.0699964	0.0698105	0.0148988	0.0453901	0.0612728	0.0666328	0.0729105	0.0784738	0.0935775
2021-10-03	growth_rate	NA	estimate	0.0695873	0.0694258	0.0148465	0.0452358	0.0610733	0.0663684	0.0725801	0.0780399	0.0931496
2021-10-04	growth_rate	NA	estimate	0.0691035	0.0688483	0.0147613	0.044545	0.0603496	0.0658199	0.072092	0.0774768	0.0923407
2021-10-05	growth_rate	NA	estimate	0.0682605	0.068092	0.0146164	0.0435147	0.0597385	0.0649184	0.0714163	0.0765265	0.0914496
2021-10-06	growth_rate	NA	estimate	0.0674208	0.0671578	0.0144207	0.0433025	0.0587734	0.0641676	0.0704842	0.0756365	0.0906719
2021-10-07	growth_rate	NA	estimate	0.0660397	0.0660377	0.0142114	0.0427939	0.0579201	0.0630501	0.0691928	0.074364	0.0887339
2021-10-08	growth_rate	NA	estimate	0.0647025	0.0647214	0.0140386	0.0414151	0.0567292	0.0615752	0.0678473	0.072888	0.0875931
2021-10-09	growth_rate	NA	estimate	0.0631812	0.0632026	0.013944	0.0401438	0.0551459	0.0602762	0.0661894	0.0710958	0.0860982
2021-10-10	growth_rate	NA	estimate	0.0614886	0.0614837	0.0139399	0.0387497	0.0534933	0.0585026	0.0643149	0.0691857	0.0841777
2021-10-11	growth_rate	NA	estimate	0.0597141	0.0595791	0.0139983	0.0374065	0.051489	0.0562598	0.0625047	0.0671616	0.0828469
2021-10-12	growth_rate	NA	estimate	0.0574094	0.0575174	0.0140589	0.0354261	0.0492873	0.054255	0.0605021	0.065282	0.0807996
2021-10-13	growth_rate	NA	estimate	0.0553283	0.05534	0.0140569	0.0337484	0.0470509	0.0522289	0.0581466	0.0630917	0.0781562
2021-10-14	growth_rate	NA	estimate	0.0530385	0.0530988	0.0139552	0.031055	0.0449221	0.0500659	0.0561589	0.0608907	0.0755812
2021-10-15	growth_rate	NA	estimate	0.0509914	0.0508515	0.0137649	0.0286804	0.042591	0.0480665	0.0540498	0.0587251	0.0731365
2021-10-16	growth_rate	NA	estimate	0.0492066	0.0486557	0.0135424	0.0260223	0.0406858	0.0460325	0.0519851	0.0567151	0.0699935
2021-10-17	growth_rate	NA	estimate	0.0472383	0.0465627	0.0133618	0.0237553	0.0389296	0.0442574	0.0499548	0.0546796	0.0667724
2021-10-18	growth_rate	NA	estimate	0.0453645	0.0446119	0.0132757	0.0217925	0.0370264	0.0423837	0.0481105	0.0526777	0.0650056
2021-10-19	growth_rate	NA	estimate	0.043553	0.0428269	0.0132874	0.0199642	0.0351994	0.0404782	0.0463841	0.0507585	0.063178
2021-10-20	growth_rate	NA	estimate	0.0418495	0.0412141	0.0133525	0.0185891	0.0335515	0.0387577	0.0446683	0.0491442	0.0618995
2021-10-21	growth_rate	NA	estimate	0.0403169	0.039764	0.0134078	0.0175646	0.0320465	0.037295	0.0431575	0.0477016	0.0609245
2021-10-22	growth_rate	NA	estimate	0.0389904	0.038454	0.0134067	0.0160781	0.0306355	0.0359484	0.0420317	0.0462053	0.0599288
2021-10-23	growth_rate	NA	estimate	0.0375472	0.0372521	0.0133407	0.01489	0.0295291	0.0347361	0.0406321	0.0449918	0.0586908
2021-10-24	growth_rate	NA	estimate	0.036513	0.0361217	0.0132373	0.0137665	0.028649	0.0334624	0.0392902	0.0438634	0.0570843
2021-10-25	growth_rate	NA	estimate	0.035419	0.0350248	0.0131395	0.0127406	0.0274688	0.0323932	0.0380985	0.0427577	0.0563593
2021-10-26	growth_rate	NA	estimate	0.0341675	0.0339259	0.013077	0.0121781	0.0264733	0.0313311	0.0371058	0.0415906	0.0550819
2021-10-27	growth_rate	NA	estimate	0.0329491	0.0327945	0.0130493	0.0109703	0.0254856	0.0301847	0.0357233	0.0402576	0.053864
2021-10-28	growth_rate	NA	estimate	0.0317004	0.0316069	0.0130304	0.0103934	0.024304	0.0289673	0.0343342	0.0389362	0.0528308
2021-10-29	growth_rate	NA	estimate	0.0302079	0.0303469	0.0129915	0.00899829	0.0230162	0.0277822	0.0329998	0.0377361	0.0513198
2021-10-30	growth_rate	NA	estimate	0.0290219	0.0290052	0.0129246	0.00876389	0.0215896	0.0265016	0.0316896	0.0362313	0.0496897
2021-10-31	growth_rate	NA	estimate	0.0275622	0.0275771	0.0128493	0.0069157	0.0201429	0.0249618	0.0303201	0.0347261	0.048502
2021-11-01	growth_rate	NA	estimate	0.0260423	0.0260595	0.0127999	0.00546166	0.0185896	0.0231901	0.0286994	0.0334056	0.0469419
2021-11-02	growth_rate	NA	estimate	0.0241995	0.0244468	0.0127996	0.00428868	0.0169067	0.0214351	0.0269727	0.0317101	0.0453998
2021-11-03	growth_rate	NA	estimate	0.0223635	0.022728	0.0128417	0.00242134	0.0150873	0.0196708	0.0250994	0.0299988	0.0442743
2021-11-04	growth_rate	NA	estimate	0.0204493	0.0208844	0.0128948	0.000374278	0.0132311	0.0176517	0.0234098	0.0284306	0.0422911
2021-11-05	growth_rate	NA	estimate	0.0183072	0.0188899	0.0129274	-0.000875947	0.0107855	0.0155573	0.0213658	0.0264204	0.0407799
2021-11-06	growth_rate	NA	estimate	0.0160297	0.016712	0.0129334	-0.0027875	0.00848485	0.0130734	0.0189103	0.0242986	0.0386839
2021-11-07	growth_rate	NA	estimate	0.0135441	0.0143143	0.0129391	-0.00490674	0.00600458	0.0105269	0.0164682	0.0217482	0.0365652
2021-11-08	growth_rate	NA	estimate	0.0106862	0.0116602	0.0129859	-0.0070651	0.00323294	0.00785822	0.0136413	0.0192287	0.034679
2021-11-09	growth_rate	NA	estimate	0.00763514	0.00871657	0.0130985	-0.0101925	8.36694e-05	0.0046066	0.0105246	0.0160254	0.0322597
2021-11-10	growth_rate	NA	estimate	0.00416084	0.00545895	0.0132593	-0.0135657	-0.00334047	0.00144599	0.00730984	0.0125581	0.028959
2021-11-11	growth_rate	NA	estimate	0.000554114	0.00187606	0.0134094	-0.0172131	-0.00684545	-0.00236242	0.00342461	0.00894824	0.0258904
2021-11-12	growth_rate	NA	estimate	-0.00335042	-0.00202517	0.0134749	-0.0214602	-0.0105529	-0.00600788	-0.000457085	0.00517305	0.0218302
2021-11-13	growth_rate	NA	estimate	-0.00737816	-0.00621589	0.0134034	-0.0257562	-0.0144835	-0.0100315	-0.00458868	0.000637155	0.0178815
2021-11-14	growth_rate	NA	estimate	-0.0116822	-0.0106434	0.0131928	-0.0306097	-0.0188257	-0.0140432	-0.0088854	-0.00352026	0.012589
2021-11-15	growth_rate	NA	estimate	-0.0158345	-0.0152322	0.0129016	-0.0355814	-0.0229332	-0.0184091	-0.0131891	-0.00834995	0.0068068
2021-11-16	growth_rate	NA	estimate	-0.02002	-0.0198872	0.0126347	-0.0398192	-0.0272544	-0.02257	-0.0174756	-0.0129525	0.00213915
2021-11-17	growth_rate	NA	estimate	-0.0242303	-0.0245002	0.0125027	-0.0449742	-0.0317061	-0.0268984	-0.0217346	-0.0173965	-0.00399441
2021-11-18	growth_rate	NA	estimate	-0.028355	-0.0289573	0.0125703	-0.0504245	-0.0360889	-0.0309907	-0.0258229	-0.0215303	-0.00926573
2021-11-19	growth_rate	NA	estimate	-0.0323484	-0.033147	0.0128227	-0.0555541	-0.040301	-0.0349926	-0.0296265	-0.0252831	-0.0140606
2021-11-20	growth_rate	NA	estimate	-0.0357376	-0.0369674	0.0131764	-0.0602578	-0.0442886	-0.0386302	-0.0330017	-0.0285784	-0.0178258
2021-11-21	growth_rate	NA	estimate	-0.0388467	-0.0403328	0.0135202	-0.0646	-0.0474097	-0.0419782	-0.0360837	-0.0316456	-0.021051
2021-11-22	growth_rate	NA	estimate	-0.041503	-0.0431784	0.013756	-0.068416	-0.0500115	-0.0446425	-0.0388339	-0.0342319	-0.0239882
2021-11-23	growth_rate	NA	estimate	-0.0437076	-0.0454633	0.0138226	-0.0712215	-0.0526211	-0.0467905	-0.0409701	-0.0364995	-0.0260767
2021-11-24	growth_rate	NA	estimate	-0.0454482	-0.0471729	0.0137061	-0.0726157	-0.0543145	-0.0484834	-0.0426548	-0.0380711	-0.0280708
2021-11-25	growth_rate	NA	estimate	-0.0467686	-0.0483191	0.0134418	-0.0728263	-0.0553878	-0.0498614	-0.0438738	-0.0395352	-0.0293792
2021-11-26	growth_rate	NA	estimate	-0.0476087	-0.0489385	0.0131096	-0.0726639	-0.056325	-0.0507009	-0.0447753	-0.0404455	-0.029954
2021-11-27	growth_rate	NA	estimate	-0.0481103	-0.0490903	0.0128176	-0.0721018	-0.0563819	-0.0509651	-0.0453138	-0.0410718	-0.0299711
2021-11-28	growth_rate	NA	estimate	-0.0479928	-0.0488515	0.0126706	-0.0709627	-0.0562416	-0.0510354	-0.0453031	-0.0411264	-0.0296981
2021-11-29	growth_rate	NA	estimate	-0.0479916	-0.0483113	0.012727	-0.0698726	-0.0559062	-0.0506928	-0.0452667	-0.0409173	-0.0287493
2021-11-30	growth_rate	NA	estimate	-0.0476461	-0.0475643	0.0129681	-0.0679882	-0.0554363	-0.0504015	-0.0448971	-0.0403372	-0.0264139
2021-12-01	growth_rate	NA	estimate	-0.0470679	-0.0467024	0.0133052	-0.0671633	-0.0546947	-0.0499897	-0.044537	-0.03968	-0.0239604
2021-12-02	growth_rate	NA	estimate	-0.0466078	-0.0458073	0.0136208	-0.0662307	-0.0538131	-0.0494666	-0.0439728	-0.0389996	-0.0219576
2021-12-03	growth_rate	NA	estimate	-0.046078	-0.0449439	0.0138172	-0.0652978	-0.0530594	-0.0487242	-0.0431116	-0.0382228	-0.0209442
2021-12-04	growth_rate	NA	estimate	-0.045328	-0.0441548	0.0138504	-0.0647821	-0.0521837	-0.0477586	-0.0424206	-0.0375214	-0.0198459
2021-12-05	growth_rate	NA	estimate	-0.0443449	-0.0434592	0.0137415	-0.0636227	-0.0515833	-0.0471407	-0.0415555	-0.0366706	-0.019457
2021-12-06	growth_rate	NA	estimate	-0.0435808	-0.0428536	0.0135673	-0.0629424	-0.0511023	-0.0463738	-0.0408336	-0.0356609	-0.0196
2021-12-07	growth_rate	NA	estimate	-0.0430043	-0.0423168	0.0134303	-0.0628056	-0.0505883	-0.045707	-0.0400721	-0.034966	-0.0194493
2021-12-08	growth_rate	NA	estimate	-0.0422033	-0.0418157	0.0134139	-0.0625425	-0.0498962	-0.04514	-0.0393356	-0.0345472	-0.019494
2021-12-09	growth_rate	NA	estimate	-0.0417147	-0.0413128	0.0135433	-0.0624886	-0.0492079	-0.0445532	-0.0387878	-0.0337434	-0.0189397
2021-12-10	growth_rate	NA	estimate	-0.041062	-0.0407734	0.0137752	-0.0624129	-0.0486496	-0.0439259	-0.0381411	-0.0331941	-0.0177982
2021-12-11	growth_rate	NA	estimate	-0.0403892	-0.0401707	0.0140256	-0.0625526	-0.0480402	-0.0433204	-0.0373794	-0.0324148	-0.016845
2021-12-12	growth_rate	NA	estimate	-0.0395481	-0.0394897	0.014213	-0.0620157	-0.047322	-0.0425426	-0.0365599	-0.0315902	-0.0160997
2021-12-13	growth_rate	NA	estimate	-0.0387625	-0.0387296	0.0142914	-0.0613789	-0.0467186	-0.041689	-0.0358647	-0.0305035	-0.0160662
2021-12-14	growth_rate	NA	estimate	-0.0380775	-0.0379042	0.0142604	-0.0599874	-0.0458237	-0.0409741	-0.0351643	-0.0297108	-0.0147129
2021-12-15	growth_rate	NA	estimate	-0.037223	-0.0370413	0.0141555	-0.0588859	-0.045039	-0.040214	-0.0342365	-0.0289688	-0.0138433
2021-12-16	growth_rate	NA	estimate	-0.0364066	-0.03618	0.0140273	-0.0575909	-0.0444615	-0.0396009	-0.033346	-0.0282594	-0.0135837
2021-12-17	growth_rate	NA	estimate	-0.0359382	-0.0353673	0.0139202	-0.0565804	-0.0436859	-0.0389979	-0.0325678	-0.0273521	-0.0123029
2021-12-18	growth_rate	NA	estimate	-0.035317	-0.0346525	0.0138604	-0.0561437	-0.0430654	-0.0385262	-0.0320442	-0.0266507	-0.0108539
2021-12-19	growth_rate	NA	estimate	-0.0347739	-0.0340818	0.0138569	-0.0552809	-0.0426529	-0.0378652	-0.0315408	-0.0261576	-0.0104337
2021-12-20	growth_rate	NA	estimate	-0.0345701	-0.0336918	0.0139111	-0.0546799	-0.0423608	-0.0373841	-0.0313114	-0.0257358	-0.0103652
2021-12-21	growth_rate	NA	estimate	-0.0342614	-0.0335057	0.0140239	-0.0549009	-0.0421108	-0.0373522	-0.0309673	-0.0254591	-0.0102981
2021-12-22	growth_rate	NA	estimate	-0.0343713	-0.0335298	0.0141932	-0.0553254	-0.0424388	-0.0372803	-0.0310255	-0.0253882	-0.00970165
2021-12-23	growth_rate	NA	estimate	-0.0342943	-0.0337528	0.0144054	-0.0557844	-0.0427712	-0.0373007	-0.031214	-0.0255313	-0.00915616
2021-12-24	growth_rate	NA	estimate	-0.0345153	-0.0341458	0.0146325	-0.057404	-0.0431134	-0.0375569	-0.0313709	-0.0260582	-0.00984171
2021-12-25	growth_rate	NA	estimate	-0.0349223	-0.0346648	0.0148419	-0.0588432	-0.0435612	-0.0378324	-0.0315258	-0.0263341	-0.0101886
2021-12-26	growth_rate	NA	estimate	-0.035069	-0.0352528	0.015016	-0.0598672	-0.0438422	-0.0384377	-0.0319419	-0.0266004	-0.0104007
2021-12-27	growth_rate	NA	estimate	-0.0353019	-0.0358438	0.0151666	-0.0613544	-0.0446305	-0.0386051	-0.0321006	-0.0269694	-0.0120489
2021-12-28	growth_rate	NA	estimate	-0.0354356	-0.0363663	0.0153341	-0.0630853	-0.0451847	-0.0387379	-0.0323168	-0.0271836	-0.01251
2021-12-29	growth_rate	NA	estimate	-0.0355635	-0.0367483	0.0155684	-0.0641292	-0.0457077	-0.0392412	-0.0322555	-0.0271219	-0.0133313
2021-12-30	growth_rate	NA	estimate	-0.0357443	-0.0369213	0.0158999	-0.06494	-0.0459087	-0.0394626	-0.032118	-0.0267041	-0.0130992
2021-12-31	growth_rate	NA	estimate	-0.035442	-0.036824	0.0163188	-0.0660583	-0.0460315	-0.0392797	-0.0317089	-0.0263524	-0.0121934
2022-01-01	growth_rate	NA	estimate	-0.0350072	-0.0364049	0.0167777	-0.066288	-0.0456841	-0.0389489	-0.0310644	-0.0256964	-0.0112259
2022-01-02	growth_rate	NA	estimate	-0.0344049	-0.0356226	0.0172185	-0.0660001	-0.0452382	-0.0380881	-0.0304936	-0.024493	-0.00968659
2022-01-03	growth_rate	NA	estimate	-0.0333594	-0.0344461	0.0176134	-0.0651647	-0.0447674	-0.0371688	-0.0293336	-0.0230955	-0.00764849
2022-01-04	growth_rate	NA	estimate	-0.0318603	-0.0328534	0.0180058	-0.0638279	-0.0432556	-0.03612	-0.0277969	-0.0214199	-0.00523432
2022-01-05	growth_rate	NA	estimate	-0.0298578	-0.0308312	0.018541	-0.0625783	-0.0422892	-0.0343821	-0.0258548	-0.0189974	-0.00221138
2022-01-06	growth_rate	NA	estimate	-0.0280714	-0.0283742	0.0194716	-0.0605061	-0.0408206	-0.0324441	-0.0234174	-0.0158852	0.0024133
2022-01-07	growth_rate	NA	estimate	-0.0252775	-0.0254862	0.0211167	-0.0593867	-0.0390495	-0.0304358	-0.0205034	-0.0119072	0.00872308
2022-01-08	growth_rate	NA	estimate	-0.022537	-0.0221799	0.0237735	-0.060595	-0.0374916	-0.0281733	-0.0167967	-0.006747	0.0173937
2022-01-09	growth_rate	NA	estimate	-0.0196485	-0.0184777	0.0276351	-0.0626362	-0.036781	-0.0259697	-0.0128766	-0.000673641	0.0286427
2022-01-10	growth_rate	NA	estimate based on partial data	-0.0164077	-0.0144114	0.0327758	-0.0652231	-0.0359305	-0.0240346	-0.00901017	0.00584462	0.043233
2022-01-11	growth_rate	NA	estimate based on partial data	-0.0134041	-0.0100212	0.0391957	-0.0681909	-0.0360386	-0.0219139	-0.00421001	0.0133545	0.0611339
2022-01-12	growth_rate	NA	estimate based on partial data	-0.0108281	-0.00535457	0.0468697	-0.0729042	-0.0366768	-0.0202102	-0.000290477	0.0211846	0.0807501
2022-01-13	growth_rate	NA	estimate based on partial data	-0.00810842	-0.000464781	0.0557735	-0.0784285	-0.0375414	-0.0193026	0.004238	0.0287351	0.104616
2022-01-14	growth_rate	NA	estimate based on partial data	-0.00582614	0.00459086	0.0658908	-0.0833022	-0.0380447	-0.0182738	0.00819526	0.0366515	0.127902
2022-01-15	growth_rate	NA	estimate based on partial data	-0.00397568	0.0097529	0.0772131	-0.089301	-0.0393959	-0.0175302	0.0121376	0.0444317	0.157048
2022-01-16	growth_rate	NA	estimate based on partial data	-0.0023613	0.0149624	0.0897389	-0.0953645	-0.0405439	-0.0170988	0.0153529	0.0507228	0.187689
2022-01-17	growth_rate	NA	estimate based on partial data	-0.000318153	0.0201647	0.103473	-0.101672	-0.0418921	-0.0169996	0.0181948	0.0572202	0.217152
2022-01-18	growth_rate	NA	estimate based on partial data	0.00116462	0.0253135	0.118429	-0.109056	-0.0432205	-0.0173674	0.021475	0.0638592	0.243839
2021-08-17	doubling_time	NA	estimate	9.39866	5.75247	NA	-11.7441	-190.059	17.6263	5.74306	3.32977	1.56087
2021-08-18	doubling_time	NA	estimate	12.4055	7.84176	NA	-11.5514	-66.5019	26.5527	7.52291	4.16698	2.08288
2021-08-19	doubling_time	NA	estimate	18.3282	12.0405	NA	-11.3061	-40.2852	52.5113	10.5318	5.65225	2.98379
2021-08-20	doubling_time	NA	estimate	35.8415	24.2053	NA	-10.9845	-28.4238	2587.09	17.3952	8.93588	4.79342
2021-08-21	doubling_time	NA	estimate	1758.12	328.997	NA	-10.7431	-21.6631	-52.6478	52.9987	19.823	9.39494
2021-08-22	doubling_time	NA	estimate	-31.7069	-32.0348	NA	-10.5068	-16.8741	-23.519	-48.4797	-261.859	28.3367
2021-08-23	doubling_time	NA	estimate	-16.6675	-16.3687	NA	-8.84843	-12.4786	-14.7517	-18.9717	-24.4874	-80.0932
2021-08-24	doubling_time	NA	estimate	-12.4362	-11.5745	NA	-6.20694	-9.84124	-11.4802	-13.5151	-15.6183	-24.3993
2021-08-25	doubling_time	NA	estimate	-10.5345	-9.33955	NA	-4.94404	-8.20571	-9.66241	-11.3702	-12.7097	-16.9391
2021-08-26	doubling_time	NA	estimate	-9.36373	-8.11994	NA	-4.32968	-6.92648	-8.55709	-10.1458	-11.4085	-14.4001
2021-08-27	doubling_time	NA	estimate	-8.58292	-7.42132	NA	-4.03664	-6.10837	-7.68761	-9.38869	-10.6418	-13.2722
2021-08-28	doubling_time	NA	estimate	-8.03244	-7.04215	NA	-3.92245	-5.68964	-7.13609	-8.88977	-10.1425	-12.632
2021-08-29	doubling_time	NA	estimate	-7.70743	-6.89123	NA	-3.96382	-5.52522	-6.85071	-8.53747	-9.87829	-12.4208
2021-08-30	doubling_time	NA	estimate	-7.532	-6.92921	NA	-4.15648	-5.54249	-6.72175	-8.39996	-9.73154	-12.521
2021-08-31	doubling_time	NA	estimate	-7.56957	-7.14694	NA	-4.48965	-5.7609	-6.78105	-8.40376	-9.77518	-12.6678
2021-09-01	doubling_time	NA	estimate	-7.81141	-7.55806	NA	-4.99475	-6.19689	-7.07829	-8.57169	-9.99014	-13.081
2021-09-02	doubling_time	NA	estimate	-8.34085	-8.19875	NA	-5.58836	-6.83438	-7.68459	-9.05441	-10.4856	-13.8111
2021-09-03	doubling_time	NA	estimate	-9.21009	-9.13331	NA	-6.26043	-7.71164	-8.59679	-10.0238	-11.4121	-15.335
2021-09-04	doubling_time	NA	estimate	-10.498	-10.4671	NA	-7.03283	-8.67831	-9.70907	-11.3194	-12.9151	-19.6404
2021-09-05	doubling_time	NA	estimate	-11.9728	-12.3728	NA	-7.91286	-9.88069	-11.1262	-13.0255	-15.32	-40.8709
2021-09-06	doubling_time	NA	estimate	-13.9776	-15.146	NA	-9.04418	-11.336	-12.9221	-15.4139	-18.9211	182.647
2021-09-07	doubling_time	NA	estimate	-16.8561	-19.3323	NA	-10.2477	-13.2978	-15.2456	-18.8464	-24.5783	33.5123
2021-09-08	doubling_time	NA	estimate	-21.0733	-26.0685	NA	-12.0139	-15.7952	-18.5875	-24.4199	-38.1444	21.9168
2021-09-09	doubling_time	NA	estimate	-27.8416	-38.212	NA	-14.2166	-19.3458	-23.6954	-33.9957	-86.245	18.2265
2021-09-10	doubling_time	NA	estimate	-40.8052	-65.7003	NA	-17.148	-24.9271	-31.98	-57.6595	876.213	17.1969
2021-09-11	doubling_time	NA	estimate	-72.3059	-184.139	NA	-21.2066	-34.8346	-49.8537	-174.239	85.8277	16.6645
2021-09-12	doubling_time	NA	estimate	-275.775	295.63	NA	-27.3431	-54.1089	-101.605	246.175	48.7559	15.6881
2021-09-13	doubling_time	NA	estimate	182.254	87.3198	NA	-37.1204	-113.573	-4777.86	74.1935	35.3863	14.64
2021-09-14	doubling_time	NA	estimate	68.8514	52.5819	NA	-49.9416	1966.01	112.976	44.8042	27.8629	14.157
2021-09-15	doubling_time	NA	estimate	42.4065	38.0312	NA	-69.6271	110.637	56.2724	32.5584	23.2069	13.1288
2021-09-16	doubling_time	NA	estimate	31.3258	29.8977	NA	-123.289	57.8465	38.1036	26.1227	20.0993	12.5153
2021-09-17	doubling_time	NA	estimate	24.96	24.6408	NA	-407.476	39.4474	29.1912	21.6946	17.4535	11.7449
2021-09-18	doubling_time	NA	estimate	20.9123	20.9468	NA	171.876	30.3266	23.8273	18.6768	15.5426	11.1374
2021-09-19	doubling_time	NA	estimate	18.044	18.2182	NA	75.466	24.8826	20.1271	16.363	14.2595	10.511
2021-09-20	doubling_time	NA	estimate	15.9286	16.1432	NA	45.0085	21.0652	17.5647	14.703	13.0494	9.86133
2021-09-21	doubling_time	NA	estimate	14.4803	14.5408	NA	33.494	18.3672	15.7304	13.4243	12.0382	9.23454
2021-09-22	doubling_time	NA	estimate	13.2444	13.2962	NA	26.8144	16.4673	14.3665	12.369	11.1989	8.73058
2021-09-23	doubling_time	NA	estimate	12.3606	12.3312	NA	23.0061	15.0546	13.2823	11.6036	10.4675	8.32961
2021-09-24	doubling_time	NA	estimate	11.6515	11.5893	NA	20.6352	13.9436	12.4473	10.9604	9.96893	8.01281
2021-09-25	doubling_time	NA	estimate	11.1157	11.0274	NA	18.914	13.1441	11.8305	10.4706	9.59011	7.71149
2021-09-26	doubling_time	NA	estimate	10.6998	10.6114	NA	17.8401	12.5366	11.3242	10.1429	9.28157	7.50941
2021-09-27	doubling_time	NA	estimate	10.3606	10.3139	NA	16.577	12.0755	10.9221	9.87942	9.10392	7.3554
2021-09-28	doubling_time	NA	estimate	10.139	10.1119	NA	15.9007	11.7201	10.6604	9.67205	8.93253	7.3162
2021-09-29	doubling_time	NA	estimate	10.0111	9.98662	NA	15.4765	11.5366	10.4964	9.53785	8.82891	7.34413
2021-09-30	doubling_time	NA	estimate	9.92762	9.92226	NA	15.2541	11.3931	10.419	9.4769	8.78265	7.34122
2021-10-01	doubling_time	NA	estimate	9.89362	9.90623	NA	15.2398	11.357	10.3871	9.47657	8.78363	7.39775
2021-10-02	doubling_time	NA	estimate	9.90262	9.92898	NA	15.2709	11.3125	10.4025	9.50682	8.83285	7.4072
2021-10-03	doubling_time	NA	estimate	9.96083	9.98399	NA	15.323	11.3494	10.4439	9.5501	8.88196	7.44123
2021-10-04	doubling_time	NA	estimate	10.0306	10.0678	NA	15.5606	11.4855	10.531	9.61475	8.94651	7.50641
2021-10-05	doubling_time	NA	estimate	10.1544	10.1796	NA	15.929	11.603	10.6772	9.70573	9.05761	7.57956
2021-10-06	doubling_time	NA	estimate	10.2809	10.3212	NA	16.0071	11.7936	10.8021	9.83408	9.16418	7.64456
2021-10-07	doubling_time	NA	estimate	10.4959	10.4962	NA	16.1973	11.9673	10.9936	10.0176	9.32101	7.81152
2021-10-08	doubling_time	NA	estimate	10.7128	10.7097	NA	16.7366	12.2185	11.2569	10.2163	9.50976	7.91326
2021-10-09	doubling_time	NA	estimate	10.9708	10.9671	NA	17.2666	12.5693	11.4995	10.4722	9.74949	8.05066
2021-10-10	doubling_time	NA	estimate	11.2728	11.2737	NA	17.8878	12.9576	11.8481	10.7774	10.0187	8.23433
2021-10-11	doubling_time	NA	estimate	11.6078	11.6341	NA	18.5301	13.4621	12.3205	11.0895	10.3206	8.3666
2021-10-12	doubling_time	NA	estimate	12.0738	12.0511	NA	19.566	14.0634	12.7757	11.4566	10.6177	8.5786
2021-10-13	doubling_time	NA	estimate	12.5279	12.5252	NA	20.5387	14.7318	13.2713	11.9207	10.9863	8.86874
2021-10-14	doubling_time	NA	estimate	13.0687	13.0539	NA	22.32	15.43	13.8447	12.3426	11.3835	9.17089
2021-10-15	doubling_time	NA	estimate	13.5934	13.6308	NA	24.168	16.2745	14.4206	12.8242	11.8032	9.47745
2021-10-16	doubling_time	NA	estimate	14.0865	14.246	NA	26.6367	17.0366	15.0578	13.3336	12.2216	9.90302
2021-10-17	doubling_time	NA	estimate	14.6734	14.8863	NA	29.1786	17.8051	15.6617	13.8755	12.6765	10.3807
2021-10-18	doubling_time	NA	estimate	15.2795	15.5373	NA	31.8067	18.7204	16.3541	14.4074	13.1583	10.6629
2021-10-19	doubling_time	NA	estimate	15.915	16.1849	NA	34.7194	19.692	17.1239	14.9436	13.6558	10.9713
2021-10-20	doubling_time	NA	estimate	16.5629	16.8182	NA	37.2879	20.6592	17.8841	15.5177	14.1043	11.1979
2021-10-21	doubling_time	NA	estimate	17.1925	17.4315	NA	39.4627	21.6294	18.5855	16.0609	14.5309	11.3771
2021-10-22	doubling_time	NA	estimate	17.7774	18.0254	NA	43.1113	22.6256	19.2818	16.4911	15.0015	11.5662
2021-10-23	doubling_time	NA	estimate	18.4607	18.6069	NA	46.5511	23.4733	19.9547	17.0591	15.4061	11.8102
2021-10-24	doubling_time	NA	estimate	18.9836	19.1892	NA	50.3502	24.1945	20.7142	17.6417	15.8024	12.1425
2021-10-25	doubling_time	NA	estimate	19.5699	19.7902	NA	54.4045	25.234	21.3979	18.1936	16.2111	12.2987
2021-10-26	doubling_time	NA	estimate	20.2867	20.4312	NA	56.9177	26.1829	22.1233	18.6803	16.6659	12.5839
2021-10-27	doubling_time	NA	estimate	21.0369	21.1361	NA	63.1838	27.1976	22.9635	19.4032	17.2178	12.8685
2021-10-28	doubling_time	NA	estimate	21.8656	21.9303	NA	66.691	28.5199	23.9286	20.1883	17.8021	13.1201
2021-10-29	doubling_time	NA	estimate	22.9459	22.8408	NA	77.031	30.1156	24.9493	21.0046	18.3683	13.5064
2021-10-30	doubling_time	NA	estimate	23.8836	23.8974	NA	79.0913	32.1056	26.155	21.873	19.1312	13.9495
2021-10-31	doubling_time	NA	estimate	25.1484	25.1349	NA	100.228	34.4115	27.7683	22.861	19.9604	14.2911
2021-11-01	doubling_time	NA	estimate	26.6162	26.5986	NA	126.912	37.2867	29.8898	24.152	20.7494	14.7661
2021-11-02	doubling_time	NA	estimate	28.643	28.3532	NA	161.623	40.9984	32.337	25.6981	21.8589	15.2676
2021-11-03	doubling_time	NA	estimate	30.9946	30.4976	NA	286.266	45.9423	35.2373	27.616	23.1058	15.6557
2021-11-04	doubling_time	NA	estimate	33.8959	33.1898	NA	1851.96	52.3878	39.268	29.6092	24.3803	16.3899
2021-11-05	doubling_time	NA	estimate	37.862	36.6941	NA	-791.311	64.2664	44.5544	32.4418	26.2353	16.9973
2021-11-06	doubling_time	NA	estimate	43.2415	41.4761	NA	-248.663	81.6923	53.0198	36.6545	28.5262	17.9182
2021-11-07	doubling_time	NA	estimate	51.1771	48.4234	NA	-141.264	115.436	65.8451	42.09	31.8715	18.9565
2021-11-08	doubling_time	NA	estimate	64.8635	59.4458	NA	-98.1086	214.401	88.2066	50.8123	36.0476	19.9875
2021-11-09	doubling_time	NA	estimate	90.7838	79.5206	NA	-68.0055	8284.36	150.468	65.8599	43.253	21.4865
2021-11-10	doubling_time	NA	estimate	166.588	126.974	NA	-51.0956	-207.5	479.359	94.8238	55.1953	23.9355
2021-11-11	doubling_time	NA	estimate	1250.91	369.469	NA	-40.2685	-101.257	-293.405	202.402	77.4618	26.7723
2021-11-12	doubling_time	NA	estimate	-206.884	-342.267	NA	-32.2991	-65.683	-115.373	-1516.45	133.992	31.7518
2021-11-13	doubling_time	NA	estimate	-93.9458	-111.512	NA	-26.9119	-47.8576	-69.0973	-151.056	1087.88	38.7633
2021-11-14	doubling_time	NA	estimate	-59.3338	-65.1243	NA	-22.6447	-36.8193	-49.3582	-78.0097	-196.902	55.0599
2021-11-15	doubling_time	NA	estimate	-43.7744	-45.5053	NA	-19.4806	-30.2247	-37.6524	-52.5545	-83.0121	101.832
2021-11-16	doubling_time	NA	estimate	-34.6227	-34.8539	NA	-17.4074	-25.4325	-30.711	-39.6637	-53.5147	324.029
2021-11-17	doubling_time	NA	estimate	-28.6066	-28.2915	NA	-15.4121	-21.8616	-25.7691	-31.8914	-39.8441	-173.529
2021-11-18	doubling_time	NA	estimate	-24.4453	-23.9369	NA	-13.7462	-19.2067	-22.3663	-26.8423	-32.194	-74.8076
2021-11-19	doubling_time	NA	estimate	-21.4275	-20.9113	NA	-12.477	-17.1993	-19.8084	-23.3962	-27.4154	-49.2971
2021-11-20	doubling_time	NA	estimate	-19.3955	-18.7502	NA	-11.503	-15.6507	-17.9431	-21.0034	-24.2542	-38.8844
2021-11-21	doubling_time	NA	estimate	-17.8432	-17.1857	NA	-10.7298	-14.6204	-16.5121	-19.2094	-21.9035	-32.927
2021-11-22	doubling_time	NA	estimate	-16.7011	-16.0531	NA	-10.1314	-13.8598	-15.5266	-17.849	-20.2486	-28.8954
2021-11-23	doubling_time	NA	estimate	-15.8587	-15.2463	NA	-9.73227	-13.1724	-14.8138	-16.9184	-18.9906	-26.5811
2021-11-24	doubling_time	NA	estimate	-15.2514	-14.6937	NA	-9.54542	-12.7617	-14.2966	-16.2502	-18.2066	-24.6928
2021-11-25	doubling_time	NA	estimate	-14.8208	-14.3452	NA	-9.51782	-12.5144	-13.9015	-15.7987	-17.5324	-23.5931
2021-11-26	doubling_time	NA	estimate	-14.5593	-14.1636	NA	-9.53908	-12.3062	-13.6713	-15.4806	-17.1378	-23.1404
2021-11-27	doubling_time	NA	estimate	-14.4075	-14.1198	NA	-9.61346	-12.2938	-13.6004	-15.2966	-16.8765	-23.1272
2021-11-28	doubling_time	NA	estimate	-14.4427	-14.1889	NA	-9.76776	-12.3244	-13.5817	-15.3002	-16.8541	-23.3398
2021-11-29	doubling_time	NA	estimate	-14.4431	-14.3475	NA	-9.92015	-12.3984	-13.6735	-15.3125	-16.9402	-24.1101
2021-11-30	doubling_time	NA	estimate	-14.5478	-14.5729	NA	-10.1951	-12.5035	-13.7525	-15.4386	-17.1838	-26.2418
2021-12-01	doubling_time	NA	estimate	-14.7265	-14.8418	NA	-10.3203	-12.673	-13.8658	-15.5634	-17.4684	-28.9289
2021-12-02	doubling_time	NA	estimate	-14.8719	-15.1318	NA	-10.4657	-12.8806	-14.0124	-15.7631	-17.7732	-31.5675
2021-12-03	doubling_time	NA	estimate	-15.0429	-15.4225	NA	-10.6152	-13.0636	-14.2259	-16.078	-18.1344	-33.095
2021-12-04	doubling_time	NA	estimate	-15.2918	-15.6981	NA	-10.6997	-13.2828	-14.5136	-16.3399	-18.4734	-34.9264
2021-12-05	doubling_time	NA	estimate	-15.6308	-15.9494	NA	-10.8947	-13.4374	-14.7038	-16.68	-18.902	-35.6245
2021-12-06	doubling_time	NA	estimate	-15.9049	-16.1748	NA	-11.0124	-13.5639	-14.9469	-16.9749	-19.4372	-35.3646
2021-12-07	doubling_time	NA	estimate	-16.1181	-16.3799	NA	-11.0364	-13.7017	-15.165	-17.2975	-19.8234	-35.6386
2021-12-08	doubling_time	NA	estimate	-16.424	-16.5763	NA	-11.0828	-13.8918	-15.3555	-17.6214	-20.0638	-35.557
2021-12-09	doubling_time	NA	estimate	-16.6164	-16.778	NA	-11.0924	-14.0861	-15.5577	-17.8703	-20.5417	-36.5975
2021-12-10	doubling_time	NA	estimate	-16.8805	-17	NA	-11.1058	-14.2478	-15.7799	-18.1732	-20.8816	-38.9448
2021-12-11	doubling_time	NA	estimate	-17.1617	-17.255	NA	-11.081	-14.4285	-16.0005	-18.5436	-21.3837	-41.1485
2021-12-12	doubling_time	NA	estimate	-17.5267	-17.5526	NA	-11.177	-14.6475	-16.293	-18.9592	-21.9418	-43.0533
2021-12-13	doubling_time	NA	estimate	-17.8819	-17.8971	NA	-11.2929	-14.8366	-16.6266	-19.3267	-22.7236	-43.1433
2021-12-14	doubling_time	NA	estimate	-18.2036	-18.2868	NA	-11.5549	-15.1264	-16.9167	-19.7117	-23.3298	-47.1117
2021-12-15	doubling_time	NA	estimate	-18.6215	-18.7128	NA	-11.771	-15.3899	-17.2365	-20.2459	-23.9274	-50.0709
2021-12-16	doubling_time	NA	estimate	-19.0391	-19.1583	NA	-12.0357	-15.5898	-17.5033	-20.7865	-24.528	-51.028
2021-12-17	doubling_time	NA	estimate	-19.2872	-19.5985	NA	-12.2507	-15.8666	-17.774	-21.2832	-25.3417	-56.3402
2021-12-18	doubling_time	NA	estimate	-19.6265	-20.0028	NA	-12.346	-16.0952	-17.9916	-21.631	-26.0086	-63.8618
2021-12-19	doubling_time	NA	estimate	-19.933	-20.3378	NA	-12.5386	-16.2509	-18.3057	-21.9762	-26.4989	-66.4333
2021-12-20	doubling_time	NA	estimate	-20.0505	-20.5732	NA	-12.6765	-16.3629	-18.5412	-22.1372	-26.9332	-66.8723
2021-12-21	doubling_time	NA	estimate	-20.2312	-20.6874	NA	-12.6254	-16.4601	-18.5571	-22.3832	-27.2259	-67.3083
2021-12-22	doubling_time	NA	estimate	-20.1664	-20.6725	NA	-12.5285	-16.3329	-18.5929	-22.3412	-27.3019	-71.4463
2021-12-23	doubling_time	NA	estimate	-20.2117	-20.536	NA	-12.4255	-16.2059	-18.5827	-22.2063	-27.1489	-75.7028
2021-12-24	doubling_time	NA	estimate	-20.0823	-20.2996	NA	-12.0749	-16.0773	-18.4559	-22.0952	-26.6	-70.4296
2021-12-25	doubling_time	NA	estimate	-19.8483	-19.9957	NA	-11.7796	-15.912	-18.3215	-21.9866	-26.3213	-68.0313
2021-12-26	doubling_time	NA	estimate	-19.7652	-19.6622	NA	-11.5781	-15.8101	-18.033	-21.7003	-26.0578	-66.6441
2021-12-27	doubling_time	NA	estimate	-19.6348	-19.338	NA	-11.2974	-15.5308	-17.9548	-21.593	-25.7013	-57.5276
2021-12-28	doubling_time	NA	estimate	-19.5607	-19.0601	NA	-10.9875	-15.3403	-17.8932	-21.4485	-25.4987	-55.4073
2021-12-29	doubling_time	NA	estimate	-19.4904	-18.862	NA	-10.8086	-15.1648	-17.6638	-21.4893	-25.5568	-51.9941
2021-12-30	doubling_time	NA	estimate	-19.3918	-18.7736	NA	-10.6737	-15.0984	-17.5647	-21.5812	-25.9566	-52.9151
2021-12-31	doubling_time	NA	estimate	-19.5572	-18.8232	NA	-10.493	-15.0581	-17.6465	-21.8597	-26.303	-56.8462
2022-01-01	doubling_time	NA	estimate	-19.8002	-19.04	NA	-10.4566	-15.1726	-17.7963	-22.3132	-26.9745	-61.7453
2022-01-02	doubling_time	NA	estimate	-20.1467	-19.4581	NA	-10.5022	-15.3222	-18.1985	-22.7309	-28.2998	-71.5574
2022-01-03	doubling_time	NA	estimate	-20.7782	-20.1226	NA	-10.6368	-15.4833	-18.6486	-23.6298	-30.0122	-90.6254
2022-01-04	doubling_time	NA	estimate	-21.7559	-21.0982	NA	-10.8596	-16.0245	-19.1901	-24.9362	-32.3599	-132.424
2022-01-05	doubling_time	NA	estimate	-23.215	-22.482	NA	-11.0765	-16.3906	-20.1601	-26.8092	-36.4865	-313.445
2022-01-06	doubling_time	NA	estimate	-24.6923	-24.4287	NA	-11.4558	-16.9803	-21.3644	-29.5997	-43.6348	287.219
2022-01-07	doubling_time	NA	estimate	-27.4215	-27.197	NA	-11.6718	-17.7505	-22.7741	-33.8064	-58.2126	79.4613
2022-01-08	doubling_time	NA	estimate	-30.7559	-31.2512	NA	-11.439	-18.488	-24.6029	-41.2668	-102.734	39.8505
2022-01-09	doubling_time	NA	estimate	-35.2773	-37.5126	NA	-11.0662	-18.8452	-26.6906	-53.8299	-1028.96	24.1998
2022-01-10	doubling_time	NA	estimate based on partial data	-42.2453	-48.0972	NA	-10.6273	-19.2913	-28.8396	-76.9294	118.596	16.0328
2022-01-11	doubling_time	NA	estimate based on partial data	-51.7116	-69.1683	NA	-10.1648	-19.2335	-31.6304	-164.643	51.9038	11.3382
2022-01-12	doubling_time	NA	estimate based on partial data	-64.0137	-129.45	NA	-9.50764	-18.8988	-34.2968	-2386.24	32.7194	8.58386
2022-01-13	doubling_time	NA	estimate based on partial data	-85.4849	-1491.34	NA	-8.83795	-18.4635	-35.9095	163.555	24.122	6.62566
2022-01-14	doubling_time	NA	estimate based on partial data	-118.972	150.984	NA	-8.32087	-18.2193	-37.9312	84.579	18.9118	5.41935
2022-01-15	doubling_time	NA	estimate based on partial data	-174.347	71.0708	NA	-7.76192	-17.5944	-39.5402	57.1076	15.6003	4.41361
2022-01-16	doubling_time	NA	estimate based on partial data	-293.544	46.3258	NA	-7.26839	-17.0962	-40.5378	45.1478	13.6654	3.69307
2022-01-17	doubling_time	NA	estimate based on partial data	-2178.66	34.3743	NA	-6.8175	-16.546	-40.7743	38.096	12.1137	3.19199
2022-01-18	doubling_time	NA	estimate based on partial data	595.17	27.3825	NA	-6.35586	-16.0375	-39.9109	32.2769	10.8543	2.84264
2021-08-17	infections	NA	estimate	53.764	54.792	6.85986	45.4683	49.9589	52.2837	55.4091	58.6421	67.5073
2021-08-18	infections	NA	estimate	55.7991	58.3562	10.3727	45.8932	50.8383	53.8013	58.3535	63.7346	79.1302
2021-08-19	infections	NA	estimate	56.1605	59.9403	13.4251	44.7498	50.0234	53.5392	59.404	66.9157	87.2237
2021-08-20	infections	NA	estimate	55.4197	59.3592	14.488	42.8559	48.3349	52.253	59.0539	67.3668	88.2588
2021-08-21	infections	NA	estimate	53.4856	56.8569	13.5662	40.5835	46.269	50.2143	57.4559	65.2103	83.0183
2021-08-22	infections	NA	estimate	50.695	52.9904	11.4172	38.1836	43.9212	47.5984	54.3429	60.8192	74.0736
2021-08-23	infections	NA	estimate	47.3449	48.3999	8.92159	35.7838	41.3241	44.662	49.9608	54.6612	63.896
2021-08-24	infections	NA	estimate	43.1029	43.6228	6.74145	33.4947	38.53	41.2343	45.0493	48.2747	55.2064
2021-08-25	infections	NA	estimate	38.6569	39.0364	5.23177	31.0876	35.2194	37.321	40.0489	42.4904	48.1968
2021-08-26	infections	NA	estimate	34.7075	34.8494	4.43693	27.9177	31.7772	33.6138	35.7402	37.6681	42.3712
2021-08-27	infections	NA	estimate	31.1969	31.151	4.13847	24.2254	28.6476	30.2169	32.1546	33.7656	37.7432
2021-08-28	infections	NA	estimate	28.1632	27.956	4.04953	20.3541	25.6657	27.3323	29.109	30.6077	34.2396
2021-08-29	infections	NA	estimate	25.6316	25.2389	3.9871	17.5631	23.1188	24.7712	26.4872	27.8979	31.2074
2021-08-30	infections	NA	estimate	23.5024	22.9559	3.87832	15.5265	20.8675	22.5476	24.2579	25.6331	28.5591
2021-08-31	infections	NA	estimate	21.5239	21.0581	3.70856	14.0873	18.9072	20.6208	22.3579	23.6191	26.3783
2021-09-01	infections	NA	estimate	19.8962	19.4978	3.48591	13.153	17.2806	19.0256	20.7054	21.9551	24.6118
2021-09-02	infections	NA	estimate	18.5211	18.2372	3.23265	12.4987	16.0268	17.7019	19.3118	20.5574	23.056
2021-09-03	infections	NA	estimate	17.3933	17.2351	2.96214	12.1779	15.139	16.5876	18.1688	19.3936	21.7849
2021-09-04	infections	NA	estimate	16.5044	16.4593	2.69429	11.9807	14.5143	15.7836	17.2296	18.4187	20.7261
2021-09-05	infections	NA	estimate	15.8676	15.8812	2.45075	11.8877	14.1037	15.2149	16.5091	17.6166	19.8981
2021-09-06	infections	NA	estimate	15.4387	15.4746	2.25295	11.8624	13.8629	14.8355	16.0042	17.0489	19.2753
2021-09-07	infections	NA	estimate	15.149	15.2147	2.11509	11.8234	13.7013	14.6242	15.6928	16.6187	18.8033
2021-09-08	infections	NA	estimate	14.9877	15.0786	2.03554	11.8612	13.6488	14.4919	15.5253	16.3805	18.5261
2021-09-09	infections	NA	estimate	14.9612	15.0461	1.99657	11.9616	13.7065	14.4428	15.4753	16.2709	18.4664
2021-09-10	infections	NA	estimate	14.9706	15.1012	1.97566	12.06	13.7518	14.5162	15.5209	16.3054	18.508
2021-09-11	infections	NA	estimate	15.1132	15.2336	1.95789	12.2706	13.9063	14.6318	15.6072	16.3921	18.6786
2021-09-12	infections	NA	estimate	15.2963	15.4387	1.94004	12.4993	14.1378	14.8495	15.7772	16.5902	18.8906
2021-09-13	infections	NA	estimate	15.5709	15.7176	1.92697	12.7979	14.4067	15.1292	16.0476	16.8281	19.0951
2021-09-14	infections	NA	estimate	15.9469	16.0749	1.92558	13.1371	14.7554	15.4815	16.4095	17.1866	19.4962
2021-09-15	infections	NA	estimate	16.3781	16.5182	1.94028	13.5774	15.1815	15.9269	16.8577	17.6491	19.9374
2021-09-16	infections	NA	estimate	16.8952	17.0567	1.97142	14.0643	15.7023	16.4362	17.4291	18.1968	20.5121
2021-09-17	infections	NA	estimate	17.5591	17.7003	2.01607	14.6799	16.3061	17.0678	18.0577	18.8759	21.2507
2021-09-18	infections	NA	estimate	18.3337	18.4594	2.07002	15.3537	17.0584	17.8394	18.8291	19.697	22.0174
2021-09-19	infections	NA	estimate	19.2458	19.3448	2.12974	16.1224	17.9023	18.717	19.7599	20.6567	22.9668
2021-09-20	infections	NA	estimate	20.2639	20.3668	2.19391	17.0216	18.8725	19.7427	20.8009	21.7149	24.0636
2021-09-21	infections	NA	estimate	21.4515	21.5355	2.26436	18.0612	19.9796	20.8842	21.9868	22.9321	25.3378
2021-09-22	infections	NA	estimate	22.7546	22.8597	2.34599	19.2493	21.2383	22.1818	23.3003	24.3103	26.8055
2021-09-23	infections	NA	estimate	24.2161	24.3468	2.44556	20.6493	22.6845	23.6496	24.7975	25.8611	28.5114
2021-09-24	infections	NA	estimate	25.8644	26.0023	2.5694	22.0849	24.2587	25.2331	26.4718	27.5515	30.3995
2021-09-25	infections	NA	estimate	27.6588	27.8295	2.72092	23.6382	25.9608	26.9877	28.3362	29.4798	32.5399
2021-09-26	infections	NA	estimate	29.6626	29.8301	2.89923	25.3319	27.8692	28.9638	30.3564	31.6025	34.8754
2021-09-27	infections	NA	estimate	31.8133	32.0045	3.09921	27.2493	29.8843	31.0958	32.5404	33.8639	37.4644
2021-09-28	infections	NA	estimate	34.1268	34.3529	3.3133	29.3181	32.1192	33.3927	34.8733	36.3688	40.2148
2021-09-29	infections	NA	estimate	36.6541	36.8761	3.5348	31.5753	34.4561	35.8234	37.4411	38.994	43.1426
2021-09-30	infections	NA	estimate	39.3249	39.5758	3.76141	33.8127	37.0463	38.504	40.1731	41.8454	46.2718
2021-10-01	infections	NA	estimate	42.2108	42.4549	3.99641	36.2954	39.7488	41.3396	43.1471	44.9245	49.5635
2021-10-02	infections	NA	estimate	45.2992	45.517	4.24631	38.9355	42.6241	44.3205	46.3253	48.0961	52.8037
2021-10-03	infections	NA	estimate	48.5656	48.7648	4.51648	41.8662	45.6478	47.461	49.6604	51.5687	56.5704
2021-10-04	infections	NA	estimate	52.0118	52.1991	4.80766	44.76	48.8974	50.8499	53.1901	55.2336	60.3146
2021-10-05	infections	NA	estimate	55.5874	55.8176	5.11491	47.8036	52.3263	54.4085	56.817	59.0129	64.7157
2021-10-06	infections	NA	estimate	59.3121	59.6136	5.42971	51.2186	56	58.1293	60.6797	62.9151	69.0014
2021-10-07	infections	NA	estimate	63.285	63.576	5.74406	54.649	59.7164	61.9801	64.7346	67.0105	73.4953
2021-10-08	infections	NA	estimate	67.3874	67.6891	6.05425	58.4615	63.5525	65.9064	68.9011	71.3941	78.1616
2021-10-09	infections	NA	estimate	71.5409	71.9334	6.36199	62.3192	67.6803	70.0312	73.0825	76.0072	82.8107
2021-10-10	infections	NA	estimate	75.7634	76.2863	6.67277	66.3045	71.7622	74.2054	77.4918	80.5381	87.6825
2021-10-11	infections	NA	estimate	80.2306	80.7239	6.99326	70.1703	76.026	78.5825	81.9869	85.1368	92.6648
2021-10-12	infections	NA	estimate	84.7229	85.2225	7.32894	73.9245	80.2468	83.0058	86.5525	89.7701	97.6504
2021-10-13	infections	NA	estimate	89.2433	89.7604	7.68168	77.9814	84.5257	87.4835	91.2176	94.5069	103.086
2021-10-14	infections	NA	estimate	93.9099	94.3197	8.04729	81.867	88.907	92.0697	95.813	99.2887	108.21
2021-10-15	infections	NA	estimate	98.5789	98.8877	8.41513	85.7582	93.181	96.5226	100.581	104.033	113.38
2021-10-16	infections	NA	estimate	103.157	103.458	8.77259	89.946	97.432	100.916	105.223	108.81	118.315
2021-10-17	infections	NA	estimate	107.743	108.031	9.11295	93.683	101.845	105.374	109.986	113.489	123.203
2021-10-18	infections	NA	estimate	112.225	112.613	9.44068	97.5704	106.448	109.859	114.733	118.419	128.618
2021-10-19	infections	NA	estimate	116.762	117.212	9.7695	101.802	110.863	114.508	119.264	123.269	133.557
2021-10-20	infections	NA	estimate	121.482	121.839	10.1152	105.675	115.319	119.186	123.853	128.126	138.913
2021-10-21	infections	NA	estimate	126.192	126.503	10.488	109.614	119.821	123.745	128.588	133.002	143.931
2021-10-22	infections	NA	estimate	130.827	131.204	10.8889	113.659	124.131	128.259	133.436	138.001	149.508
2021-10-23	infections	NA	estimate	135.369	135.942	11.3093	118.067	128.548	132.884	138.287	143.176	155.265
2021-10-24	infections	NA	estimate	140.151	140.707	11.7354	122.194	133.01	137.458	143.248	148.406	160.397
2021-10-25	infections	NA	estimate	144.817	145.483	12.1537	126.142	137.444	142.088	148.002	153.307	166.125
2021-10-26	infections	NA	estimate	149.641	150.252	12.5559	130.876	142.013	146.642	153.046	158.256	171.672
2021-10-27	infections	NA	estimate	154.487	154.987	12.9402	134.799	146.415	151.272	157.807	163.17	177.161
2021-10-28	infections	NA	estimate	159.193	159.663	13.3084	138.957	150.775	155.967	162.525	168.191	182.078
2021-10-29	infections	NA	estimate	163.907	164.247	13.6604	142.762	155.139	160.419	167.206	173.057	187.234
2021-10-30	infections	NA	estimate	168.393	168.708	13.9913	146.205	159.426	164.844	171.744	177.691	192.32
2021-10-31	infections	NA	estimate	172.573	173.012	14.2953	150.224	163.305	169.283	176.093	182.344	197.387
2021-11-01	infections	NA	estimate	176.786	177.124	14.5718	153.712	167.263	173.34	180.178	186.766	202.278
2021-11-02	infections	NA	estimate	180.829	181.005	14.8281	157.462	171.061	177.078	184.029	190.595	206.516
2021-11-03	infections	NA	estimate	184.245	184.614	15.0745	160.681	174.476	180.756	187.677	194.251	210.244
2021-11-04	infections	NA	estimate	187.343	187.901	15.3159	163.374	177.626	183.96	191.04	197.649	213.753
2021-11-05	infections	NA	estimate	189.979	190.808	15.5453	165.851	180.23	186.591	193.831	200.759	217.161
2021-11-06	infections	NA	estimate	192.524	193.265	15.7454	168.254	182.579	189.1	196.335	203.396	219.522
2021-11-07	infections	NA	estimate	194.199	195.196	15.901	170.549	184.629	190.789	198.275	205	222.287
2021-11-08	infections	NA	estimate	195.653	196.518	16.0121	171.852	185.876	191.643	199.667	206.291	224.13
2021-11-09	infections	NA	estimate	196.035	197.148	16.0978	172.733	186.251	192.289	200.149	206.794	225.054
2021-11-10	infections	NA	estimate	195.929	197.009	16.1843	172.13	186.145	192.089	199.794	207.042	225.507
2021-11-11	infections	NA	estimate	194.829	196.032	16.2827	171.561	184.811	191.145	198.52	206.024	224.645
2021-11-12	infections	NA	estimate	192.765	194.168	16.3691	170.019	182.851	189.037	196.915	204.101	223.097
2021-11-13	infections	NA	estimate	189.966	191.391	16.3851	167.487	180.029	186.135	193.969	201.482	220.323
2021-11-14	infections	NA	estimate	186.231	187.71	16.2596	164.373	176.419	182.427	190.16	197.557	216.474
2021-11-15	infections	NA	estimate	181.668	183.168	15.9403	159.891	172.247	178.009	185.562	192.587	211.733
2021-11-16	infections	NA	estimate	176.369	177.851	15.4194	155.129	167.213	172.999	180.087	187.009	205.103
2021-11-17	infections	NA	estimate	170.564	171.878	14.7404	149.803	161.745	167.267	174.128	180.795	198.569
2021-11-18	infections	NA	estimate	164.381	165.397	13.9853	143.943	155.638	161.12	167.707	174.047	190.237
2021-11-19	infections	NA	estimate	157.874	158.567	13.2458	137.674	149.499	154.681	160.999	166.717	181.664
2021-11-20	infections	NA	estimate	150.994	151.551	12.5913	131.724	143	147.86	153.965	159.411	173.496
2021-11-21	infections	NA	estimate	143.888	144.496	12.0507	125.32	136.514	141.15	146.837	151.916	165.176
2021-11-22	infections	NA	estimate	137.257	137.534	11.6134	118.982	129.945	134.389	139.939	144.739	157.227
2021-11-23	infections	NA	estimate	130.562	130.769	11.2448	112.652	123.419	127.802	133.218	137.832	149.669
2021-11-24	infections	NA	estimate	124.157	124.278	10.9032	106.495	117.177	121.464	126.89	131.318	142.343
2021-11-25	infections	NA	estimate	118.181	118.116	10.5528	100.98	111.143	115.326	120.61	125.033	135.314
2021-11-26	infections	NA	estimate	112.295	112.31	10.1723	95.8589	105.629	109.728	114.815	118.886	128.916
2021-11-27	infections	NA	estimate	106.842	106.873	9.75823	91.0842	100.281	104.413	109.322	113.25	123.028
2021-11-28	infections	NA	estimate	101.798	101.801	9.32312	87.0297	95.3368	99.3504	104.08	108.002	117.535
2021-11-29	infections	NA	estimate	96.9422	97.0755	8.88932	83.2912	90.9701	94.7088	99.1222	102.882	111.997
2021-11-30	infections	NA	estimate	92.3657	92.6739	8.48072	79.3981	86.9352	90.3738	94.4235	98.2779	107.071
2021-12-01	infections	NA	estimate	88.1853	88.5664	8.11418	75.9358	83.1644	86.3352	90.2558	93.9386	102.273
2021-12-02	infections	NA	estimate	84.4118	84.7209	7.79348	72.5864	79.5296	82.607	86.3574	89.5911	97.8887
2021-12-03	infections	NA	estimate	80.8844	81.106	7.5082	69.4302	76.0647	78.9866	82.6654	85.7245	93.8191
2021-12-04	infections	NA	estimate	77.4431	77.6933	7.23906	66.5716	72.8286	75.5701	79.1403	82.0832	90.2451
2021-12-05	infections	NA	estimate	74.2657	74.4593	6.96694	63.8292	69.6409	72.4913	75.7907	78.5568	86.3949
2021-12-06	infections	NA	estimate	71.0525	71.3872	6.68105	61.1105	66.8658	69.5056	72.68	75.3136	82.6665
2021-12-07	infections	NA	estimate	68.1183	68.4666	6.38267	58.757	64.2149	66.6438	69.6673	72.3129	79.2824
2021-12-08	infections	NA	estimate	65.3753	65.6926	6.08357	56.4153	61.618	63.9481	66.8634	69.3488	76.0833
2021-12-09	infections	NA	estimate	62.8318	63.0638	5.80071	54.1075	59.1541	61.4356	64.1997	66.6298	72.9758
2021-12-10	infections	NA	estimate	60.323	60.58	5.54922	51.8354	56.7223	59.0701	61.6878	64.0701	70.0515
2021-12-11	infections	NA	estimate	58.0241	58.2406	5.3364	49.8365	54.5804	56.7273	59.3141	61.6517	67.4373
2021-12-12	infections	NA	estimate	55.8071	56.0426	5.15969	47.889	52.5526	54.6094	57.0919	59.3377	64.883
2021-12-13	infections	NA	estimate	53.7316	53.9806	5.00984	46.0765	50.5914	52.5795	55.0232	57.1382	62.5278
2021-12-14	infections	NA	estimate	51.877	52.0463	4.87641	44.4265	48.7636	50.651	53.0641	55.155	60.4284
2021-12-15	infections	NA	estimate	49.9924	50.2291	4.75145	42.8882	46.9489	48.8667	51.2476	53.2811	58.3009
2021-12-16	infections	NA	estimate	48.2713	48.5163	4.62999	41.4351	45.3021	47.1595	49.5102	51.51	56.3351
2021-12-17	infections	NA	estimate	46.6215	46.894	4.50888	39.9898	43.8127	45.5051	47.8577	49.7835	54.5116
2021-12-18	infections	NA	estimate	45.1015	45.3474	4.38588	38.6787	42.3484	43.9679	46.2945	48.2169	52.7656
2021-12-19	infections	NA	estimate	43.5913	43.8619	4.2599	37.3845	40.9021	42.4969	44.7337	46.6007	51.1607
2021-12-20	infections	NA	estimate	42.1867	42.4241	4.13165	36.1361	39.4946	41.1292	43.2159	45.0814	49.553
2021-12-21	infections	NA	estimate	40.7753	41.0227	4.00367	35.0207	38.1586	39.7868	41.7563	43.5694	48.0298
2021-12-22	infections	NA	estimate	39.367	39.6487	3.87938	33.8273	36.8798	38.3968	40.3996	42.1187	46.4202
2021-12-23	infections	NA	estimate	38.0427	38.2967	3.76171	32.7614	35.6188	37.1023	39.0003	40.7508	44.863
2021-12-24	infections	NA	estimate	36.7177	36.9639	3.65208	31.5371	34.3533	35.7815	37.6516	39.3257	43.3297
2021-12-25	infections	NA	estimate	35.4143	35.6509	3.5501	30.3288	33.1436	34.5422	36.3234	37.9021	41.8941
2021-12-26	infections	NA	estimate	34.1212	34.3607	3.45418	29.0998	31.9292	33.2643	35.0388	36.5203	40.5354
2021-12-27	infections	NA	estimate	32.8731	33.0987	3.36293	27.9714	30.7532	32.044	33.7413	35.2262	39.1952
2021-12-28	infections	NA	estimate	31.6572	31.8725	3.27701	26.8708	29.6291	30.8885	32.4899	33.9617	37.6858
2021-12-29	infections	NA	estimate	30.5317	30.6906	3.19977	25.7139	28.471	29.7818	31.2782	32.7048	36.1852
2021-12-30	infections	NA	estimate	29.4316	29.5623	3.13563	24.6781	27.4174	28.6828	30.1819	31.5501	34.854
2021-12-31	infections	NA	estimate	28.4163	28.4968	3.08735	23.6529	26.3824	27.6458	29.1671	30.4755	33.738
2022-01-01	infections	NA	estimate	27.4175	27.5024	3.05429	22.6275	25.4288	26.6648	28.1857	29.4827	32.6104
2022-01-02	infections	NA	estimate	26.5187	26.586	3.03285	21.7385	24.5777	25.7628	27.2705	28.5503	31.6084
2022-01-03	infections	NA	estimate	25.7002	25.7531	3.01871	20.8724	23.7223	24.9532	26.4417	27.6965	30.7597
2022-01-04	infections	NA	estimate	24.9686	25.0085	3.0096	20.1536	23.0236	24.2009	25.7049	26.9508	29.9923
2022-01-05	infections	NA	estimate	24.2732	24.3564	3.00834	19.5322	22.3366	23.5362	25.0348	26.3135	29.3812
2022-01-06	infections	NA	estimate	23.6853	23.8011	3.02607	18.9794	21.7549	22.9218	24.4969	25.7525	28.9184
2022-01-07	infections	NA	estimate	23.221	23.3484	3.08574	18.5205	21.216	22.4328	24.0161	25.3385	28.6515
2022-01-08	infections	NA	estimate	22.8339	23.006	3.22489	17.9161	20.7531	22.0176	23.6664	25.0264	28.6088
2022-01-09	infections	NA	estimate	22.5933	22.785	3.49568	17.3601	20.3216	21.7038	23.4975	25.0071	28.9819
2022-01-10	infections	NA	estimate based on partial data	22.4295	22.7017	3.96121	16.5918	19.963	21.419	23.4677	25.2181	29.6003
2022-01-11	infections	NA	estimate based on partial data	22.3382	22.7799	4.69382	15.7568	19.4639	21.2551	23.6104	25.6966	31.0815
2022-01-12	infections	NA	estimate based on partial data	22.3757	23.0548	5.7861	14.7586	18.9825	21.049	23.8628	26.4354	33.518
2022-01-13	infections	NA	estimate based on partial data	22.4472	23.5804	7.38327	13.7589	18.3616	20.8274	24.2595	27.5986	37.2091
2022-01-14	infections	NA	estimate based on partial data	22.4291	24.4419	9.74978	12.6724	17.7592	20.5281	24.5604	29.1031	43.0038
2022-01-15	infections	NA	estimate based on partial data	22.4986	25.7807	13.4212	11.5162	17.1175	20.2866	25.08	30.7465	51.1801
2022-01-16	infections	NA	estimate based on partial data	22.585	27.8511	19.6472	10.5019	16.435	20.0072	25.5178	32.5129	62.2452
2022-01-17	infections	NA	estimate based on partial data	22.7088	31.1622	32.0392	9.40452	15.7566	19.6482	26.2145	34.7815	79.7593
2022-01-18	infections	NA	estimate based on partial data	22.8	36.9054	63.7077	8.32456	15.136	19.4107	26.7861	37.6983	103.276
2021-08-17	reported_cases	NA	estimate	18	18.6562	7.4298	8	13	16	19	23	33
2021-08-18	reported_cases	NA	estimate	23	24.1468	9.68928	11	17	20	25	30	42
2021-08-19	reported_cases	NA	estimate	26	27.819	11.0401	13	20	24	29	34	48
2021-08-20	reported_cases	NA	estimate	31	32.6352	12.808	15	23	28	34	40	56
2021-08-21	reported_cases	NA	estimate	36	38.3017	14.2154	19	28	33	40	46	65
2021-08-22	reported_cases	NA	estimate	38	39.7287	13.8469	21	30	35	41	47	66
2021-08-23	reported_cases	NA	estimate	35	36.3043	12.0475	20	28	32	38	43	58
2021-08-24	reported_cases	NA	estimate	48	49.688	15.2514	27	39	45	52	59	77
2021-08-25	reported_cases	NA	estimate	52	53.1782	16.3994	29	41	48	56	63	83
2021-08-26	reported_cases	NA	estimate	51	52.267	16.4837	28	40	47	55	62	82
2021-08-27	reported_cases	NA	estimate	50	51.7032	16.8105	27	39	46	54	62	82
2021-08-28	reported_cases	NA	estimate	51	52.198	16.8064	28	40	47	55	63	82
2021-08-29	reported_cases	NA	estimate	46.5	47.619	15.578	24	37	43	50	57	75
2021-08-30	reported_cases	NA	estimate	37	37.9607	12.6254	19	29	34	40	46	60
2021-08-31	reported_cases	NA	estimate	45	45.7615	14.487	24	35	41	48	55	71
2021-09-01	reported_cases	NA	estimate	43	43.9305	13.9096	23	34	39	46	52	68
2021-09-02	reported_cases	NA	estimate	38	38.8257	12.1234	21	30	35	41	47	60
2021-09-03	reported_cases	NA	estimate	35	35.6007	11.4614	19	27	32	37	43	56
2021-09-04	reported_cases	NA	estimate	33	33.791	11.0588	18	26	30	36	40	53
2021-09-05	reported_cases	NA	estimate	28	28.9835	9.56695	15	22	26	31	35	46
2021-09-06	reported_cases	NA	estimate	21	22.3295	7.9081	11	17	20	23	27	37
2021-09-07	reported_cases	NA	estimate	25	26.363	9.157	13	20	23	28	32	43
2021-09-08	reported_cases	NA	estimate	24	25.3783	8.93357	13	19	22	27	31	42
2021-09-09	reported_cases	NA	estimate	22	22.6062	8.09957	11	17	20	24	27	37
2021-09-10	reported_cases	NA	estimate	20	21.053	7.83703	10	15	18	22	26	35
2021-09-11	reported_cases	NA	estimate	19	20.3755	7.42511	10	15	18	21	25	33
2021-09-12	reported_cases	NA	estimate	17	18.071	6.69669	8	13	16	19	22	30
2021-09-13	reported_cases	NA	estimate	14	14.4595	5.59912	6	10	13	15	18	24
2021-09-14	reported_cases	NA	estimate	17	17.9178	6.64737	8	13	16	19	22	30
2021-09-15	reported_cases	NA	estimate	17	17.7997	6.55159	8	13	16	19	22	29
2021-09-16	reported_cases	NA	estimate	16	16.9905	6.3995	8	12	15	18	21	29
2021-09-17	reported_cases	NA	estimate	16	16.4985	6.12449	7	12	15	17	20	27
2021-09-18	reported_cases	NA	estimate	16	16.865	6.30093	8	12	15	18	21	28
2021-09-19	reported_cases	NA	estimate	15	15.8025	5.9864	7	11.75	14	17	19	27
2021-09-20	reported_cases	NA	estimate	13	13.2668	5.31767	6	9	11	14	16	23
2021-09-21	reported_cases	NA	estimate	17	17.3325	6.4212	8	13	15	18	21	29
2021-09-22	reported_cases	NA	estimate	17	18.1273	6.64305	9	13	16	19	22	30
2021-09-23	reported_cases	NA	estimate	17	17.886	6.57475	9	13	16	19	22	29
2021-09-24	reported_cases	NA	estimate	18	18.2922	6.5661	9	13	16	19	22	30
2021-09-25	reported_cases	NA	estimate	19	19.3062	6.85348	9	14	17	20	23	32
2021-09-26	reported_cases	NA	estimate	18	18.8858	6.67599	9	14	17	20	23	31
2021-09-27	reported_cases	NA	estimate	16	16.4773	6.08175	8	12	15	17	20	27
2021-09-28	reported_cases	NA	estimate	22	22.2583	7.64766	11	17	20	23	27	36
2021-09-29	reported_cases	NA	estimate	23	24.0425	8.45438	12	18	21	25	29	39
2021-09-30	reported_cases	NA	estimate	24	24.5252	8.25084	12	19	22	26	29	39
2021-10-01	reported_cases	NA	estimate	25	25.657	8.76864	13	19	23	27	31	41
2021-10-02	reported_cases	NA	estimate	27	28.116	9.3375	15	22	25	30	34	45
2021-10-03	reported_cases	NA	estimate	28	28.354	9.35195	15	22	25	30	34	45
2021-10-04	reported_cases	NA	estimate	24	24.9578	8.5048	13	19	22	26	30	40
2021-10-05	reported_cases	NA	estimate	33	34.458	11.1279	18	27	31	36	41	54
2021-10-06	reported_cases	NA	estimate	37	37.7077	11.9425	20	29	34	40	45	59
2021-10-07	reported_cases	NA	estimate	38	39.1118	12.4788	21	30	35	41	47	61
2021-10-08	reported_cases	NA	estimate	40	41.1617	12.914	22	32	37	43	49	64
2021-10-09	reported_cases	NA	estimate	44	44.6925	13.8274	24	35	40	47	53	69
2021-10-10	reported_cases	NA	estimate	44	45.322	13.8133	25	35	41	48	54	70
2021-10-11	reported_cases	NA	estimate	39	40.1345	12.7775	21	31	36	42	48	63
2021-10-12	reported_cases	NA	estimate	53	55.505	16.8023	32	44	49	58	65.25	86
2021-10-13	reported_cases	NA	estimate	59	60.4928	18.1397	33	48	55	64	71	92
2021-10-14	reported_cases	NA	estimate	60	61.8858	18.6477	35	48	56	65	74	96
2021-10-15	reported_cases	NA	estimate	63	65.046	19.5489	36	51	59	68	77	100
2021-10-16	reported_cases	NA	estimate	69	71.1893	21.7255	40	56	64	74	84	109
2021-10-17	reported_cases	NA	estimate	68	70.3485	20.3916	41	56	63	74	83	107
2021-10-18	reported_cases	NA	estimate	60	61.7503	18.1017	35	49	56	65	73	93
2021-10-19	reported_cases	NA	estimate	82	84.8063	24.9042	49	67	76	88	99	131
2021-10-20	reported_cases	NA	estimate	89	91.4095	26.4204	53	72	82	95	107	138
2021-10-21	reported_cases	NA	estimate	90	92.4527	26.9	54	73	84	96	108	141
2021-10-22	reported_cases	NA	estimate	93	95.3937	27.7227	56	76	86	99	112	145
2021-10-23	reported_cases	NA	estimate	100	102.654	29.0919	60	82	93	107	120	152
2021-10-24	reported_cases	NA	estimate	98	99.77	28.4544	58	80	90	104	116	150
2021-10-25	reported_cases	NA	estimate	86	87.7348	25.6968	49.95	69	79	92	104	134
2021-10-26	reported_cases	NA	estimate	113	116.072	33.6031	67	92	105	121	137	175
2021-10-27	reported_cases	NA	estimate	122	124.721	34.845	73.95	100	113	130	146	187
2021-10-28	reported_cases	NA	estimate	120	123.424	35.7581	71	98	111	128	145	188
2021-10-29	reported_cases	NA	estimate	125	127.835	36.6906	74.95	102	116	134	150	191
2021-10-30	reported_cases	NA	estimate	132	136.068	38.8577	80	109	124	141	159	206
2021-10-31	reported_cases	NA	estimate	129	131.954	36.8905	77	106	120	138	153	198.05
2021-11-01	reported_cases	NA	estimate	110	112.838	32.5048	65	90	102	118	132	170
2021-11-02	reported_cases	NA	estimate	146	150.214	42.9148	89	120	136	157	175	227
2021-11-03	reported_cases	NA	estimate	155	159.79	45.3114	94	128	144	166	187	243
2021-11-04	reported_cases	NA	estimate	154	158.762	44.4434	96	128	143	165	185.25	238.05
2021-11-05	reported_cases	NA	estimate	157	161.377	44.7622	95	130	146	168.4	189	242
2021-11-06	reported_cases	NA	estimate	164	169.298	47.0539	102	136	153	176	197	256
2021-11-07	reported_cases	NA	estimate	158	162.388	45.6637	96	131	147	168	189	246
2021-11-08	reported_cases	NA	estimate	135	138.952	40.1861	82	111	126	144	162	214
2021-11-09	reported_cases	NA	estimate	177	181.893	52.3348	106.95	145	163	190	212	276
2021-11-10	reported_cases	NA	estimate	185	189.641	53.2535	111	151	172	198	222	283.05
2021-11-11	reported_cases	NA	estimate	181	185.82	51.8031	109	149	169	194	217	281
2021-11-12	reported_cases	NA	estimate	181	186.775	52.5838	111	149	169	194	218	282
2021-11-13	reported_cases	NA	estimate	190	194.939	53.9145	116.95	157	177	202.4	228	289
2021-11-14	reported_cases	NA	estimate	180	185.574	51.8763	111	149	168	193	216	279
2021-11-15	reported_cases	NA	estimate	152	156.265	44.5067	91	124	142	163	183	236
2021-11-16	reported_cases	NA	estimate	195	200.567	55.5451	119	161	182	208	235	301
2021-11-17	reported_cases	NA	estimate	199.5	204.417	57.3511	121	163	185	215	241	307
2021-11-18	reported_cases	NA	estimate	190	196.005	54.951	117	157	177	204	228	296.05
2021-11-19	reported_cases	NA	estimate	189	193.604	53.7466	115	156	176	202	226	288
2021-11-20	reported_cases	NA	estimate	190	196.105	54.652	116	159	178	204	226	294
2021-11-21	reported_cases	NA	estimate	177	181.518	50.787	106.95	145	165	191	213.25	270
2021-11-22	reported_cases	NA	estimate	145	148.387	41.721	87.95	119	135	155	173	224
2021-11-23	reported_cases	NA	estimate	181	185.654	51.4862	109	150	168	193	219	279
2021-11-24	reported_cases	NA	estimate	182	186.505	52.6751	110	150	169	195	217	280
2021-11-25	reported_cases	NA	estimate	170	174.12	48.4882	103	140	158	182	204	258
2021-11-26	reported_cases	NA	estimate	161	165.728	46.2293	98	133	150	172.4	194	250
2021-11-27	reported_cases	NA	estimate	158	162.867	46.6461	96	129	147	169	190	248
2021-11-28	reported_cases	NA	estimate	145	148.155	41.6721	87	119	134	155	173	223.05
2021-11-29	reported_cases	NA	estimate	115	117.583	33.9972	68	93	106	123	137	178.05
2021-11-30	reported_cases	NA	estimate	140	144.356	39.5517	85.95	117	131	151	168	216
2021-12-01	reported_cases	NA	estimate	139	141.395	39.0499	84	113	129	148	165	209
2021-12-02	reported_cases	NA	estimate	126	129.435	36.7962	76	103	117	135	152	196
2021-12-03	reported_cases	NA	estimate	119	123.289	35.5698	72	99	112	128	144	187
2021-12-04	reported_cases	NA	estimate	117	120.849	34.5736	71	96	108	126	142	182
2021-12-05	reported_cases	NA	estimate	104	107.696	31.0343	62	86	96	112	127	163
2021-12-06	reported_cases	NA	estimate	83	85.6358	25.1418	48	68	77	90	101	130
2021-12-07	reported_cases	NA	estimate	102	104.737	30.4939	61	83	94.6	109	123	161
2021-12-08	reported_cases	NA	estimate	100	103.14	29.8635	59	82	93	107	121	156
2021-12-09	reported_cases	NA	estimate	92	94.9197	27.6148	55	75	86	100	112	144
2021-12-10	reported_cases	NA	estimate	87	89.456	25.9877	52	72	81	93	104	138
2021-12-11	reported_cases	NA	estimate	84	86.751	25.4629	50	69	78	90	102	132
2021-12-12	reported_cases	NA	estimate	77	79.0825	23.2216	45	63	71	82	93	120
2021-12-13	reported_cases	NA	estimate	61	62.8302	18.607	36	50	56	66	74	97
2021-12-14	reported_cases	NA	estimate	74	76.7302	23.0441	43	61	69	80	91	119
2021-12-15	reported_cases	NA	estimate	74	76.2998	22.0417	44	61	69	80	90	116
2021-12-16	reported_cases	NA	estimate	68	69.729	20.3953	40	56	63	73	82	106
2021-12-17	reported_cases	NA	estimate	65	67.2613	20.15	38	53	60	70	79	103
2021-12-18	reported_cases	NA	estimate	64	65.4647	19.8793	37	51	59	68	77	101
2021-12-19	reported_cases	NA	estimate	57	58.8715	17.5821	33	46	53	61	69	90
2021-12-20	reported_cases	NA	estimate	46	47.435	14.3728	27	37	43	50	56	73
2021-12-21	reported_cases	NA	estimate	57	58.592	17.5736	33	47	53	61	69	90
2021-12-22	reported_cases	NA	estimate	56	57.7313	17.5568	32	45	52	60	68	89
2021-12-23	reported_cases	NA	estimate	52	53.3428	15.9963	30	42	48	56	63	82
2021-12-24	reported_cases	NA	estimate	49	50.7575	15.5183	28	40	46	53	60	78
2021-12-25	reported_cases	NA	estimate	49	50.1215	15.0881	28	40	45	52	59	78
2021-12-26	reported_cases	NA	estimate	45	45.6857	14.1844	25	36	41	48	54	70
2021-12-27	reported_cases	NA	estimate	36	36.4453	11.6261	19	28	32	38	43	57
2021-12-28	reported_cases	NA	estimate	44	45.6187	14.2049	25	36	41	48	54	71
2021-12-29	reported_cases	NA	estimate	43	44.8475	13.771	25	35	40	47	53	70
2021-12-30	reported_cases	NA	estimate	41	41.9188	13.0055	23	33	37	44	50	65
2021-12-31	reported_cases	NA	estimate	39	39.9795	12.4725	22	31	36	42	47	62
2022-01-01	reported_cases	NA	estimate	38	38.9498	12.1389	21	30	35	41	46	61
2022-01-02	reported_cases	NA	estimate	34	35.3252	11.0884	19	27	32	37	42	55
2022-01-03	reported_cases	NA	estimate	28	28.4395	9.45578	15	22	25	30	34	45
2022-01-04	reported_cases	NA	estimate	34	35.3265	11.3438	19	27	32	37	42	56
2022-01-05	reported_cases	NA	estimate	34	34.9378	11.2976	18	27	31	37	41	56
2022-01-06	reported_cases	NA	estimate	31	32.2533	10.6056	17	25	29	34	39	51.05
2022-01-07	reported_cases	NA	estimate	30	30.816	10.1369	16	24	27	32	37	49
2022-01-08	reported_cases	NA	estimate	29	30.3517	9.97589	16	23	27	32	36	48
2022-01-09	reported_cases	NA	estimate	27	27.656	9.28473	14	21	24	29	33	44
2022-01-10	reported_cases	NA	estimate based on partial data	21	22.229	7.68771	11	17	20	23	27	36
2022-01-11	reported_cases	NA	estimate based on partial data	27	27.9507	9.34453	14	21	25	29	33	45
2022-01-12	reported_cases	NA	estimate based on partial data	27	27.833	9.52981	14	21	25	29	34	45
2022-01-13	reported_cases	NA	estimate based on partial data	25	25.996	8.86152	13	20	23	27	31	42
2022-01-14	reported_cases	NA	estimate based on partial data	24	25.206	8.82154	13	19	22	26.4	31	41
2022-01-15	reported_cases	NA	estimate based on partial data	25	25.5075	9.03888	13	19	22	27	31	42
2022-01-16	reported_cases	NA	estimate based on partial data	22	23.4265	8.61032	11	17	20	25	28	39
2022-01-17	reported_cases	NA	estimate based on partial data	19	19.5398	7.45012	9	14	17	21	24	33
2022-01-18	reported_cases	NA	estimate based on partial data	24	24.8815	9.4267	12	18	22	26	31	42
NA	day_of_week	Friday	NA	1.01719	1.01833	0.0577803	0.924574	0.97965	1.00322	1.03177	1.05575	1.11528
NA	day_of_week	Monday	NA	0.811618	0.813892	0.0503223	0.734271	0.779201	0.799369	0.825589	0.846498	0.901175
NA	day_of_week	Saturday	NA	1.04126	1.04337	0.0600906	0.947405	1.00305	1.0267	1.05683	1.08255	1.14367
NA	day_of_week	Sunday	NA	0.975989	0.977775	0.0570199	0.88665	0.939026	0.961971	0.989865	1.01451	1.07373
NA	day_of_week	Thursday	NA	1.03022	1.03014	0.0574416	0.935311	0.991459	1.0153	1.04315	1.06727	1.12513
NA	day_of_week	Tuesday	NA	1.04211	1.04338	0.0586417	0.948151	1.00301	1.0285	1.05754	1.08023	1.1408
NA	day_of_week	Wednesday	NA	1.07198	1.07312	0.0599599	0.978207	1.03247	1.05777	1.08705	1.11133	1.17595
NA	delay_mean	1	NA	1.62126	1.62125	0.0049141	1.61307	1.61801	1.62	1.62239	1.62458	1.62934
NA	delay_mean	2	NA	0.988395	0.988397	0.00702549	0.976824	0.983661	0.986531	0.990202	0.993265	1.00003
NA	delay_sd	1	NA	0.417879	0.41788	0.00549575	0.408768	0.414166	0.416482	0.419142	0.421505	0.427231
NA	delay_sd	2	NA	0.846848	0.846827	0.00493941	0.838838	0.843347	0.845394	0.848273	0.850255	0.854829
NA	gt_mean	NA	NA	3.19904	3.19964	0.036698	3.13809	3.17501	3.19051	3.20917	3.22493	3.25931
NA	gt_sd	NA	NA	2.40014	2.40014	0.0266197	2.35594	2.38234	2.39278	2.40684	2.41814	2.44436
NA	reporting_overdispersion	NA	NA	0.0039877	0.00432439	0.00206045	0.00163239	0.00279759	0.00353088	0.0044769	0.00542166	0.00829113

## Sheet: longer mean GT
date	variable	strat	type	median	mean	sd	lower_90	lower_50	lower_20	upper_20	upper_50	upper_90
2021-08-17	R	NA	estimate	2.72755	2.80482	1.1248	1.12861	1.97058	2.43059	3.00249	3.51268	4.73052
2021-08-18	R	NA	estimate	2.28581	2.29913	0.749626	1.08059	1.75811	2.09737	2.47887	2.79682	3.55743
2021-08-19	R	NA	estimate	1.90702	1.88016	0.482334	1.03707	1.5463	1.77989	2.01942	2.20744	2.66758
2021-08-20	R	NA	estimate	1.57089	1.54025	0.296882	0.991166	1.35004	1.49329	1.63038	1.74018	1.99976
2021-08-21	R	NA	estimate	1.28231	1.27001	0.175817	0.941903	1.16612	1.24107	1.32006	1.3846	1.53919
2021-08-22	R	NA	estimate	1.05907	1.05907	0.110013	0.875256	0.987463	1.03204	1.08629	1.12893	1.24369
2021-08-23	R	NA	estimate	0.900305	0.897162	0.0919205	0.740015	0.836199	0.87676	0.922079	0.95906	1.04311
2021-08-24	R	NA	estimate	0.785369	0.77493	0.0982395	0.60226	0.709384	0.758743	0.808827	0.844359	0.921658
2021-08-25	R	NA	estimate	0.692162	0.684446	0.107652	0.502255	0.606395	0.661268	0.722759	0.767336	0.847325
2021-08-26	R	NA	estimate	0.619251	0.619372	0.113455	0.436224	0.533957	0.586527	0.652548	0.707692	0.799788
2021-08-27	R	NA	estimate	0.567903	0.574891	0.114885	0.394736	0.487592	0.536317	0.600574	0.661134	0.767407
2021-08-28	R	NA	estimate	0.535588	0.547515	0.11245	0.378028	0.463316	0.507025	0.567613	0.627919	0.746115
2021-08-29	R	NA	estimate	0.52203	0.534836	0.106738	0.37721	0.45524	0.495175	0.549454	0.605673	0.733374
2021-08-30	R	NA	estimate	0.521666	0.535272	0.0982884	0.395468	0.463869	0.498668	0.54661	0.596459	0.723122
2021-08-31	R	NA	estimate	0.535135	0.547789	0.0878502	0.4242	0.48539	0.515403	0.556651	0.598622	0.71749
2021-09-01	R	NA	estimate	0.562219	0.571609	0.0769927	0.462427	0.517553	0.544897	0.58035	0.616354	0.719757
2021-09-02	R	NA	estimate	0.600095	0.605881	0.0689984	0.503832	0.556694	0.583449	0.616172	0.646903	0.732065
2021-09-03	R	NA	estimate	0.643984	0.649355	0.06865	0.547821	0.600267	0.626868	0.660569	0.690296	0.77625
2021-09-04	R	NA	estimate	0.691719	0.70012	0.0781054	0.592219	0.645049	0.672373	0.708804	0.743079	0.841312
2021-09-05	R	NA	estimate	0.738956	0.755514	0.0937549	0.634419	0.690289	0.719209	0.761764	0.802949	0.931785
2021-09-06	R	NA	estimate	0.790342	0.812304	0.109852	0.675925	0.73383	0.766831	0.817855	0.866973	1.0226
2021-09-07	R	NA	estimate	0.842635	0.867131	0.121883	0.716411	0.776463	0.814327	0.87275	0.932623	1.10067
2021-09-08	R	NA	estimate	0.893809	0.917091	0.127421	0.755851	0.820376	0.860943	0.930067	0.991081	1.15461
2021-09-09	R	NA	estimate	0.942245	0.960233	0.126212	0.792606	0.863037	0.907315	0.977997	1.03885	1.1918
2021-09-10	R	NA	estimate	0.981008	0.995797	0.119916	0.830122	0.903239	0.949767	1.01716	1.07243	1.21392
2021-09-11	R	NA	estimate	1.01224	1.02413	0.111455	0.862101	0.940712	0.983154	1.04444	1.09522	1.22464
2021-09-12	R	NA	estimate	1.03928	1.0464	0.103983	0.891569	0.968527	1.01087	1.06709	1.11425	1.22807
2021-09-13	R	NA	estimate	1.05978	1.0642	0.0996269	0.913056	0.993017	1.03333	1.08574	1.13044	1.23388
2021-09-14	R	NA	estimate	1.07789	1.07923	0.0986163	0.92729	1.01166	1.05155	1.10174	1.14491	1.24194
2021-09-15	R	NA	estimate	1.09273	1.09307	0.0995902	0.933222	1.02761	1.06879	1.11844	1.15978	1.25496
2021-09-16	R	NA	estimate	1.10921	1.10703	0.100758	0.939967	1.04459	1.0841	1.1342	1.17457	1.26529
2021-09-17	R	NA	estimate	1.12479	1.12209	0.100836	0.947832	1.06155	1.10007	1.14917	1.19065	1.27852
2021-09-18	R	NA	estimate	1.14177	1.13884	0.0993864	0.965336	1.0772	1.11725	1.1673	1.2085	1.29139
2021-09-19	R	NA	estimate	1.16051	1.15748	0.0967868	0.992205	1.09642	1.13563	1.18618	1.22475	1.3083
2021-09-20	R	NA	estimate	1.18074	1.17778	0.0939844	1.01898	1.11807	1.15537	1.20486	1.24114	1.32458
2021-09-21	R	NA	estimate	1.20163	1.19919	0.0920277	1.046	1.14049	1.17771	1.22242	1.25992	1.34677
2021-09-22	R	NA	estimate	1.22057	1.22085	0.0914765	1.06903	1.16377	1.19832	1.24304	1.27934	1.36751
2021-09-23	R	NA	estimate	1.2397	1.24176	0.0920818	1.09204	1.18437	1.21839	1.26172	1.29824	1.39163
2021-09-24	R	NA	estimate	1.2582	1.26094	0.0930436	1.11322	1.20077	1.23668	1.27996	1.31654	1.4162
2021-09-25	R	NA	estimate	1.27363	1.27762	0.0935913	1.13453	1.21578	1.25152	1.29513	1.33337	1.43335
2021-09-26	R	NA	estimate	1.28597	1.29131	0.093383	1.15024	1.22838	1.26476	1.30788	1.34526	1.4534
2021-09-27	R	NA	estimate	1.29712	1.30187	0.092542	1.16337	1.23904	1.27452	1.3191	1.35696	1.46574
2021-09-28	R	NA	estimate	1.30496	1.30948	0.0914417	1.16795	1.24843	1.28254	1.32738	1.36567	1.4669
2021-09-29	R	NA	estimate	1.31086	1.31453	0.0904146	1.17564	1.25355	1.28968	1.33229	1.37186	1.46766
2021-09-30	R	NA	estimate	1.31369	1.31754	0.0895521	1.17562	1.25807	1.29281	1.33641	1.3745	1.47052
2021-10-01	R	NA	estimate	1.31613	1.31906	0.0887073	1.17773	1.26083	1.29735	1.33672	1.37514	1.4689
2021-10-02	R	NA	estimate	1.31748	1.31955	0.0876686	1.17774	1.26343	1.29821	1.33627	1.3749	1.4641
2021-10-03	R	NA	estimate	1.31633	1.31935	0.0863463	1.17854	1.26545	1.29717	1.33819	1.37382	1.46247
2021-10-04	R	NA	estimate	1.31764	1.31865	0.0848478	1.17868	1.26372	1.29684	1.33858	1.3724	1.45726
2021-10-05	R	NA	estimate	1.31793	1.31743	0.0834148	1.18103	1.26488	1.29735	1.3359	1.3693	1.45599
2021-10-06	R	NA	estimate	1.3153	1.31554	0.0822787	1.18256	1.26441	1.29553	1.33365	1.36487	1.45252
2021-10-07	R	NA	estimate	1.3114	1.31271	0.0815293	1.18201	1.26269	1.2931	1.3292	1.36133	1.45001
2021-10-08	R	NA	estimate	1.30686	1.30863	0.0810817	1.17978	1.25734	1.28855	1.32591	1.35621	1.44471
2021-10-09	R	NA	estimate	1.30027	1.30302	0.0807491	1.17516	1.25179	1.28088	1.31926	1.35078	1.44018
2021-10-10	R	NA	estimate	1.29085	1.2957	0.0803455	1.16937	1.24497	1.27391	1.31084	1.34314	1.43371
2021-10-11	R	NA	estimate	1.28249	1.28666	0.0797408	1.16329	1.2361	1.2635	1.301	1.33438	1.42028
2021-10-12	R	NA	estimate	1.27189	1.27602	0.0788647	1.15258	1.22495	1.25396	1.29039	1.32358	1.40694
2021-10-13	R	NA	estimate	1.2595	1.2641	0.0777002	1.1439	1.21358	1.24212	1.27931	1.31112	1.39215
2021-10-14	R	NA	estimate	1.24799	1.25133	0.0762942	1.13176	1.20105	1.23123	1.26689	1.29681	1.37864
2021-10-15	R	NA	estimate	1.23544	1.23822	0.0747656	1.11932	1.18919	1.21804	1.2535	1.28325	1.36491
2021-10-16	R	NA	estimate	1.22414	1.2253	0.0732948	1.10844	1.17778	1.2068	1.24261	1.2698	1.34842
2021-10-17	R	NA	estimate	1.21315	1.21305	0.072086	1.09573	1.16787	1.19548	1.23049	1.25712	1.33183
2021-10-18	R	NA	estimate	1.2026	1.20186	0.0713054	1.08439	1.15666	1.18552	1.22003	1.24646	1.3182
2021-10-19	R	NA	estimate	1.19335	1.19199	0.0710068	1.07344	1.14823	1.17658	1.20998	1.23638	1.30904
2021-10-20	R	NA	estimate	1.18457	1.18354	0.0710898	1.06304	1.13916	1.16777	1.20051	1.23018	1.2986
2021-10-21	R	NA	estimate	1.17679	1.17646	0.0713346	1.0581	1.13105	1.1602	1.19381	1.22122	1.29309
2021-10-22	R	NA	estimate	1.17114	1.17058	0.0715024	1.05206	1.12406	1.15388	1.18747	1.2154	1.29022
2021-10-23	R	NA	estimate	1.16504	1.16564	0.0714399	1.05264	1.11864	1.14726	1.18182	1.20968	1.28449
2021-10-24	R	NA	estimate	1.15958	1.16132	0.0711213	1.04833	1.11413	1.14191	1.17702	1.20598	1.27987
2021-10-25	R	NA	estimate	1.15603	1.15728	0.070615	1.04695	1.11026	1.13829	1.17241	1.20131	1.2751
2021-10-26	R	NA	estimate	1.15087	1.15322	0.0700082	1.04139	1.10628	1.13536	1.16751	1.19554	1.27075
2021-10-27	R	NA	estimate	1.14638	1.14888	0.0693538	1.03748	1.10365	1.13141	1.16263	1.19071	1.26491
2021-10-28	R	NA	estimate	1.14185	1.1441	0.0686803	1.03749	1.0995	1.12573	1.15773	1.18621	1.25781
2021-10-29	R	NA	estimate	1.13592	1.1388	0.068043	1.03263	1.09439	1.1209	1.15307	1.18156	1.25065
2021-10-30	R	NA	estimate	1.13074	1.13298	0.0675512	1.02621	1.08984	1.11568	1.14623	1.17581	1.24477
2021-10-31	R	NA	estimate	1.12481	1.12674	0.0673245	1.01841	1.08486	1.10985	1.14062	1.16871	1.2394
2021-11-01	R	NA	estimate	1.11891	1.12019	0.0674041	1.01232	1.07723	1.10349	1.13522	1.16069	1.23242
2021-11-02	R	NA	estimate	1.11243	1.11345	0.067696	1.00362	1.07136	1.09767	1.12816	1.15386	1.22394
2021-11-03	R	NA	estimate	1.10611	1.1066	0.0680063	0.995033	1.06519	1.0918	1.12162	1.14721	1.22123
2021-11-04	R	NA	estimate	1.10024	1.09964	0.0681447	0.987037	1.05775	1.08466	1.11498	1.14166	1.212
2021-11-05	R	NA	estimate	1.09298	1.0925	0.0680184	0.977658	1.05225	1.07667	1.10841	1.13517	1.20392
2021-11-06	R	NA	estimate	1.08429	1.08503	0.0676579	0.972115	1.04261	1.06932	1.10013	1.12856	1.19558
2021-11-07	R	NA	estimate	1.07593	1.07697	0.0671713	0.969892	1.03415	1.06074	1.0913	1.11931	1.19005
2021-11-08	R	NA	estimate	1.06506	1.06802	0.0666687	0.961842	1.02453	1.05085	1.08136	1.10903	1.18101
2021-11-09	R	NA	estimate	1.05414	1.05782	0.0661981	0.95474	1.01447	1.03931	1.06993	1.09746	1.17228
2021-11-10	R	NA	estimate	1.04243	1.04602	0.065717	0.944646	1.0034	1.02716	1.05718	1.08555	1.16047
2021-11-11	R	NA	estimate	1.02893	1.03231	0.0651053	0.931789	0.989022	1.0144	1.0442	1.07157	1.14283
2021-11-12	R	NA	estimate	1.0133	1.01652	0.0642246	0.918369	0.973237	0.998685	1.0295	1.05539	1.12399
2021-11-13	R	NA	estimate	0.995938	0.998629	0.0630085	0.901957	0.956782	0.98046	1.01089	1.03759	1.10742
2021-11-14	R	NA	estimate	0.97563	0.978803	0.0615378	0.882741	0.938214	0.961143	0.990446	1.01546	1.08647
2021-11-15	R	NA	estimate	0.954008	0.957418	0.0600445	0.864063	0.917188	0.940575	0.968688	0.993771	1.06221
2021-11-16	R	NA	estimate	0.932374	0.93502	0.0588239	0.842693	0.895897	0.918306	0.946094	0.970355	1.03615
2021-11-17	R	NA	estimate	0.910072	0.912275	0.0580915	0.82116	0.875376	0.896676	0.924335	0.947852	1.01091
2021-11-18	R	NA	estimate	0.888572	0.889912	0.057868	0.796529	0.853921	0.876014	0.902807	0.925661	0.988502
2021-11-19	R	NA	estimate	0.869606	0.868659	0.0579715	0.771426	0.832505	0.856493	0.881517	0.904994	0.965234
2021-11-20	R	NA	estimate	0.850889	0.849189	0.0581161	0.748925	0.813239	0.837962	0.863603	0.886299	0.943092
2021-11-21	R	NA	estimate	0.834916	0.832078	0.0580446	0.730349	0.795762	0.821119	0.848366	0.870229	0.9216
2021-11-22	R	NA	estimate	0.820482	0.817776	0.0576191	0.716923	0.782057	0.806174	0.833899	0.85606	0.905846
2021-11-23	R	NA	estimate	0.8096	0.806582	0.0568483	0.709023	0.771323	0.795635	0.821981	0.844464	0.893432
2021-11-24	R	NA	estimate	0.800908	0.798635	0.0558716	0.702146	0.765064	0.787629	0.814189	0.836061	0.88407
2021-11-25	R	NA	estimate	0.796507	0.793901	0.0549182	0.699456	0.759483	0.782578	0.808968	0.830516	0.879241
2021-11-26	R	NA	estimate	0.794034	0.792184	0.0542496	0.702016	0.757449	0.780139	0.806912	0.827487	0.878871
2021-11-27	R	NA	estimate	0.793224	0.793126	0.0540872	0.703718	0.758411	0.779507	0.80616	0.827662	0.880711
2021-11-28	R	NA	estimate	0.794681	0.796236	0.054547	0.70835	0.761638	0.782664	0.807121	0.830696	0.885347
2021-11-29	R	NA	estimate	0.798188	0.800922	0.0555997	0.712357	0.765427	0.785853	0.811533	0.83492	0.895924
2021-11-30	R	NA	estimate	0.80356	0.806528	0.0570651	0.718148	0.769764	0.790905	0.815906	0.839867	0.90819
2021-12-01	R	NA	estimate	0.808216	0.812398	0.0586457	0.724802	0.773956	0.794986	0.821931	0.845318	0.919731
2021-12-02	R	NA	estimate	0.811835	0.817936	0.0599989	0.729432	0.778432	0.800038	0.826771	0.851437	0.925395
2021-12-03	R	NA	estimate	0.816182	0.822666	0.060844	0.733917	0.783317	0.80369	0.830773	0.858184	0.928422
2021-12-04	R	NA	estimate	0.820742	0.826288	0.0610701	0.735117	0.787133	0.807472	0.83409	0.861198	0.934115
2021-12-05	R	NA	estimate	0.824034	0.828704	0.060799	0.735143	0.789124	0.810755	0.837817	0.863948	0.937327
2021-12-06	R	NA	estimate	0.825564	0.830015	0.0603544	0.735511	0.790839	0.813489	0.840193	0.865755	0.935039
2021-12-07	R	NA	estimate	0.82873	0.830486	0.0601256	0.734377	0.791889	0.814671	0.842064	0.86621	0.935406
2021-12-08	R	NA	estimate	0.828402	0.830488	0.0603717	0.733378	0.792891	0.815193	0.843281	0.866506	0.932852
2021-12-09	R	NA	estimate	0.829577	0.830436	0.0610803	0.731839	0.792199	0.815064	0.844511	0.866953	0.932231
2021-12-10	R	NA	estimate	0.830309	0.830725	0.0619827	0.728508	0.791337	0.816473	0.846044	0.868573	0.931841
2021-12-11	R	NA	estimate	0.832234	0.831688	0.062715	0.72805	0.792879	0.817863	0.846311	0.870628	0.93385
2021-12-12	R	NA	estimate	0.835118	0.833559	0.0630122	0.727934	0.795074	0.820501	0.849108	0.87303	0.935592
2021-12-13	R	NA	estimate	0.837753	0.836458	0.0628318	0.728733	0.798829	0.823874	0.8514	0.875936	0.936027
2021-12-14	R	NA	estimate	0.842357	0.840373	0.0623653	0.734079	0.803036	0.827208	0.85578	0.880679	0.938413
2021-12-15	R	NA	estimate	0.845328	0.845158	0.0619449	0.741334	0.808433	0.831302	0.860319	0.88499	0.943345
2021-12-16	R	NA	estimate	0.849662	0.850533	0.0618888	0.750023	0.812021	0.836389	0.865484	0.889081	0.951129
2021-12-17	R	NA	estimate	0.854795	0.856115	0.0623538	0.759411	0.816174	0.840303	0.869918	0.893674	0.958706
2021-12-18	R	NA	estimate	0.859219	0.861446	0.0632811	0.763561	0.82059	0.844328	0.873445	0.898595	0.965764
2021-12-19	R	NA	estimate	0.863225	0.866052	0.0644594	0.768548	0.823789	0.847911	0.877815	0.903512	0.97719
2021-12-20	R	NA	estimate	0.866472	0.869505	0.0656487	0.769301	0.825606	0.851218	0.88041	0.907439	0.985281
2021-12-21	R	NA	estimate	0.867471	0.871473	0.06667	0.771418	0.82685	0.852226	0.881507	0.910289	0.98766
2021-12-22	R	NA	estimate	0.866627	0.871761	0.0674222	0.770479	0.826406	0.851722	0.882472	0.910125	0.988678
2021-12-23	R	NA	estimate	0.865341	0.870332	0.0678505	0.769341	0.824984	0.850008	0.882282	0.909337	0.989145
2021-12-24	R	NA	estimate	0.862285	0.867306	0.0679195	0.763538	0.822568	0.846296	0.878507	0.906934	0.985316
2021-12-25	R	NA	estimate	0.857509	0.862949	0.0676271	0.760986	0.818471	0.84316	0.87427	0.903483	0.977764
2021-12-26	R	NA	estimate	0.854186	0.857646	0.0670565	0.756079	0.813083	0.838368	0.869341	0.898322	0.969849
2021-12-27	R	NA	estimate	0.849358	0.851873	0.0664244	0.74673	0.808375	0.834297	0.864347	0.893003	0.965369
2021-12-28	R	NA	estimate	0.843632	0.846157	0.0660672	0.739086	0.803999	0.829886	0.86076	0.887724	0.958061
2021-12-29	R	NA	estimate	0.840111	0.841035	0.0663309	0.731584	0.79798	0.824294	0.856646	0.885472	0.951029
2021-12-30	R	NA	estimate	0.838577	0.837022	0.0674101	0.725651	0.792876	0.821324	0.854876	0.880891	0.944853
2021-12-31	R	NA	estimate	0.835922	0.834578	0.0692464	0.717698	0.78904	0.819528	0.852801	0.880262	0.945368
2022-01-01	R	NA	estimate	0.836574	0.834096	0.0715566	0.71187	0.787027	0.816951	0.852996	0.881281	0.94844
2022-01-02	R	NA	estimate	0.837478	0.835906	0.0739632	0.713232	0.788035	0.819503	0.856053	0.88624	0.954537
2022-01-03	R	NA	estimate	0.841337	0.840278	0.0761523	0.713207	0.790913	0.823331	0.86022	0.889837	0.962979
2022-01-04	R	NA	estimate	0.848165	0.847445	0.0780271	0.717218	0.796901	0.829346	0.866968	0.898507	0.975899
2022-01-05	R	NA	estimate	0.857351	0.85761	0.0798536	0.726695	0.806684	0.837127	0.876869	0.908577	0.988322
2022-01-06	R	NA	estimate	0.869899	0.870965	0.0823962	0.735828	0.816776	0.848962	0.890196	0.924724	1.01063
2022-01-07	R	NA	estimate	0.884219	0.887695	0.087006	0.749949	0.829743	0.863534	0.906891	0.943771	1.03474
2022-01-08	R	NA	estimate	0.904278	0.907996	0.0955853	0.757854	0.844127	0.881952	0.927958	0.968265	1.07058
2022-01-09	R	NA	estimate	0.928171	0.932091	0.110348	0.759004	0.854916	0.901072	0.955716	1.00471	1.11774
2022-01-10	R	NA	estimate based on partial data	0.954482	0.96025	0.133459	0.754636	0.864856	0.9196	0.988467	1.05032	1.18406
2022-01-11	R	NA	estimate based on partial data	0.983866	0.992811	0.166798	0.739631	0.873904	0.939518	1.02462	1.10222	1.27919
2022-01-12	R	NA	estimate based on partial data	1.01034	1.03017	0.211988	0.72229	0.878971	0.959552	1.06288	1.16484	1.40865
2022-01-13	R	NA	estimate based on partial data	1.03489	1.07277	0.270596	0.696233	0.882169	0.97412	1.1037	1.23375	1.55609
2022-01-14	R	NA	estimate based on partial data	1.0613	1.12106	0.34437	0.668427	0.880307	0.987802	1.14312	1.30463	1.75195
2022-01-15	R	NA	estimate based on partial data	1.08741	1.17542	0.435412	0.633922	0.875933	1.00223	1.18765	1.39259	1.979
2022-01-16	R	NA	estimate based on partial data	1.11701	1.23619	0.546213	0.601623	0.870432	1.01407	1.22943	1.48214	2.26267
2022-01-17	R	NA	estimate based on partial data	1.13775	1.30363	0.679618	0.571814	0.865849	1.0215	1.27644	1.5623	2.60971
2022-01-18	R	NA	estimate based on partial data	1.15885	1.37799	0.838885	0.534357	0.85541	1.02788	1.31387	1.65246	2.98997
2021-08-17	growth_rate	NA	estimate	0.276135	0.270219	0.140913	0.0271272	0.172418	0.237832	0.310403	0.368172	0.491718
2021-08-18	growth_rate	NA	estimate	0.218244	0.210171	0.106339	0.0171308	0.139633	0.191653	0.244367	0.28497	0.373106
2021-08-19	growth_rate	NA	estimate	0.162915	0.15335	0.0769388	0.00797715	0.10492	0.143141	0.180024	0.207311	0.268522
2021-08-20	growth_rate	NA	estimate	0.108746	0.100859	0.0527635	-0.00189368	0.0698003	0.0954889	0.119	0.136998	0.17791
2021-08-21	growth_rate	NA	estimate	0.0571082	0.0535492	0.0343487	-0.0127817	0.0346312	0.049328	0.0642715	0.0763469	0.103374
2021-08-22	growth_rate	NA	estimate	0.0126771	0.0119703	0.0233341	-0.0285428	-0.00274906	0.00691347	0.0182971	0.0270708	0.049835
2021-08-23	growth_rate	NA	estimate	-0.022311	-0.0236219	0.0214103	-0.0612703	-0.0373005	-0.0277171	-0.0173058	-0.00897043	0.00927631
2021-08-24	growth_rate	NA	estimate	-0.0497231	-0.0532204	0.0250701	-0.0985677	-0.0691944	-0.0564927	-0.0439319	-0.0353509	-0.0175109
2021-08-25	growth_rate	NA	estimate	-0.0737676	-0.0769974	0.0294302	-0.128405	-0.0972701	-0.0819328	-0.0656713	-0.053957	-0.034704
2021-08-26	growth_rate	NA	estimate	-0.0936004	-0.0952358	0.0325922	-0.15039	-0.118617	-0.103015	-0.0844429	-0.0694875	-0.0462948
2021-08-27	growth_rate	NA	estimate	-0.108378	-0.108273	0.0341223	-0.164485	-0.133198	-0.117938	-0.0988092	-0.0821485	-0.0542284
2021-08-28	growth_rate	NA	estimate	-0.118108	-0.116463	0.034031	-0.170906	-0.141277	-0.127123	-0.108581	-0.0911927	-0.0595385
2021-08-29	growth_rate	NA	estimate	-0.122472	-0.120166	0.0324789	-0.171055	-0.14392	-0.131145	-0.113844	-0.0974865	-0.0628284
2021-08-30	growth_rate	NA	estimate	-0.122306	-0.119745	0.0297223	-0.164797	-0.140951	-0.129851	-0.114774	-0.10013	-0.065597
2021-08-31	growth_rate	NA	estimate	-0.118279	-0.115597	0.0261561	-0.154621	-0.133909	-0.124447	-0.111827	-0.0993523	-0.0670325
2021-09-01	growth_rate	NA	estimate	-0.110094	-0.108173	0.022427	-0.141458	-0.123687	-0.115422	-0.104721	-0.0944045	-0.0665017
2021-09-02	growth_rate	NA	estimate	-0.0989711	-0.0980128	0.0195586	-0.127906	-0.111797	-0.103831	-0.0944373	-0.0858707	-0.0633122
2021-09-03	growth_rate	NA	estimate	-0.0866869	-0.0857581	0.0187306	-0.114562	-0.0990029	-0.0915465	-0.0820876	-0.074131	-0.0521752
2021-09-04	growth_rate	NA	estimate	-0.073739	-0.0721484	0.0202567	-0.101182	-0.0864959	-0.0789927	-0.0692577	-0.0604428	-0.0360529
2021-09-05	growth_rate	NA	estimate	-0.0614756	-0.0579817	0.0231027	-0.089173	-0.0741999	-0.0664709	-0.0555857	-0.0454944	-0.0151022
2021-09-06	growth_rate	NA	estimate	-0.0485402	-0.0440477	0.025916	-0.0778166	-0.0627053	-0.0544485	-0.0418961	-0.0301639	0.00490529
2021-09-07	growth_rate	NA	estimate	-0.0356827	-0.0310436	0.0277786	-0.0671327	-0.0519753	-0.0426627	-0.0286116	-0.0149837	0.0213485
2021-09-08	growth_rate	NA	estimate	-0.0238152	-0.0194956	0.0282877	-0.0570775	-0.0411412	-0.0313954	-0.0155061	-0.00196205	0.0323583
2021-09-09	growth_rate	NA	estimate	-0.0127792	-0.00970755	0.0274791	-0.0479518	-0.0309694	-0.0206738	-0.00481018	0.00837903	0.0397382
2021-09-10	growth_rate	NA	estimate	-0.00417433	-0.00174916	0.0257341	-0.0387984	-0.0216233	-0.0110529	0.00372345	0.0155001	0.0440515
2021-09-11	growth_rate	NA	estimate	0.00263946	0.00451519	0.0236566	-0.0311342	-0.0131647	-0.00366668	0.00957314	0.0202283	0.0461702
2021-09-12	growth_rate	NA	estimate	0.00844185	0.00937064	0.0218896	-0.0242488	-0.00688224	0.00235764	0.0143187	0.0240753	0.0465436
2021-09-13	growth_rate	NA	estimate	0.0128303	0.0131854	0.0208645	-0.0193031	-0.00152238	0.00719836	0.0181546	0.0274634	0.0480167
2021-09-14	growth_rate	NA	estimate	0.0165992	0.0163484	0.0206002	-0.0161245	0.00252469	0.0110242	0.0215555	0.0303254	0.0495179
2021-09-15	growth_rate	NA	estimate	0.0197282	0.01922	0.0207609	-0.0148859	0.00595321	0.0146843	0.0249068	0.0333108	0.0519351
2021-09-16	growth_rate	NA	estimate	0.0231168	0.0220969	0.0209256	-0.0132531	0.00962095	0.0179265	0.0281635	0.0362569	0.0539221
2021-09-17	growth_rate	NA	estimate	0.0262697	0.025192	0.0208098	-0.0115167	0.013177	0.0212453	0.0311111	0.0396052	0.0566316
2021-09-18	growth_rate	NA	estimate	0.0297482	0.0286242	0.0203356	-0.0076919	0.0164257	0.0247494	0.034736	0.0430048	0.0591391
2021-09-19	growth_rate	NA	estimate	0.0334509	0.032418	0.019605	-0.00170275	0.020475	0.0284585	0.0385169	0.0461578	0.0621865
2021-09-20	growth_rate	NA	estimate	0.0375186	0.0365123	0.0188276	0.00411572	0.0249201	0.0325179	0.0422259	0.04935	0.0651274
2021-09-21	growth_rate	NA	estimate	0.0415954	0.0407766	0.0182148	0.00988636	0.0294293	0.0369122	0.0458121	0.0528525	0.0689743
2021-09-22	growth_rate	NA	estimate	0.0453524	0.0450356	0.0178734	0.0147974	0.0341747	0.041037	0.0496094	0.0567065	0.0733298
2021-09-23	growth_rate	NA	estimate	0.0490776	0.0490989	0.0177615	0.0194562	0.0382938	0.0448798	0.0532359	0.0603447	0.0776004
2021-09-24	growth_rate	NA	estimate	0.0525614	0.0527912	0.0177427	0.0239136	0.0413996	0.0485644	0.0567351	0.0636473	0.0816478
2021-09-25	growth_rate	NA	estimate	0.0555137	0.0559775	0.0176867	0.0281997	0.0444945	0.0513464	0.0596698	0.0667538	0.0851804
2021-09-26	growth_rate	NA	estimate	0.057962	0.0585796	0.0175365	0.0313708	0.0469766	0.0538697	0.0620292	0.0690403	0.0883302
2021-09-27	growth_rate	NA	estimate	0.0600782	0.0605807	0.0173129	0.0340201	0.0489994	0.0557298	0.0641859	0.0711444	0.0902252
2021-09-28	growth_rate	NA	estimate	0.0615627	0.0620186	0.0170749	0.0350899	0.0507493	0.0572235	0.0656027	0.0726399	0.0910668
2021-09-29	growth_rate	NA	estimate	0.0625892	0.0629719	0.0168698	0.0364168	0.0517144	0.058645	0.0665563	0.0739035	0.0913518
2021-09-30	growth_rate	NA	estimate	0.0631396	0.063541	0.0167035	0.036447	0.052665	0.0592338	0.067435	0.0742874	0.0914995
2021-10-01	growth_rate	NA	estimate	0.0634849	0.0638294	0.0165454	0.0368485	0.0531654	0.0600839	0.0674129	0.0745996	0.0912418
2021-10-02	growth_rate	NA	estimate	0.0638195	0.0639274	0.0163573	0.036784	0.0536953	0.0601833	0.0674167	0.0743882	0.0907287
2021-10-03	growth_rate	NA	estimate	0.063725	0.0638994	0.0161233	0.0371599	0.0540556	0.0600541	0.0676141	0.0740671	0.0900073
2021-10-04	growth_rate	NA	estimate	0.0639051	0.0637773	0.0158599	0.0371723	0.0537269	0.0600017	0.06778	0.0739049	0.0893129
2021-10-05	growth_rate	NA	estimate	0.0639576	0.0635591	0.0156065	0.0374648	0.0537676	0.0601125	0.0674084	0.0734145	0.0890569
2021-10-06	growth_rate	NA	estimate	0.0634324	0.0632136	0.015402	0.0379218	0.053661	0.0597298	0.0668783	0.0725251	0.0882099
2021-10-07	growth_rate	NA	estimate	0.0627831	0.0626897	0.0152654	0.0378108	0.053465	0.0592683	0.0661311	0.0719066	0.0879259
2021-10-08	growth_rate	NA	estimate	0.0619188	0.0619284	0.015189	0.037256	0.0525027	0.0583919	0.065325	0.0709567	0.0868802
2021-10-09	growth_rate	NA	estimate	0.0607197	0.0608773	0.0151474	0.036489	0.0514528	0.0570539	0.0641816	0.0699152	0.0863082
2021-10-10	growth_rate	NA	estimate	0.0589117	0.0595018	0.0151109	0.035329	0.05001	0.0554749	0.0625091	0.0685146	0.0851138
2021-10-11	growth_rate	NA	estimate	0.0572729	0.0577945	0.0150548	0.0337682	0.0484054	0.0536294	0.0606918	0.0669873	0.082789
2021-10-12	growth_rate	NA	estimate	0.0552183	0.055779	0.0149623	0.0318069	0.0461569	0.0517338	0.058712	0.0650027	0.0805575
2021-10-13	growth_rate	NA	estimate	0.0530015	0.0535095	0.0148251	0.0301904	0.0439169	0.049565	0.056622	0.0626089	0.0776263
2021-10-14	growth_rate	NA	estimate	0.0507315	0.0510653	0.0146471	0.027422	0.0415394	0.0473409	0.0542254	0.0600683	0.0752118
2021-10-15	growth_rate	NA	estimate	0.0482279	0.0485417	0.0144469	0.0250494	0.0391599	0.0448682	0.0519141	0.0574752	0.07269
2021-10-16	growth_rate	NA	estimate	0.045964	0.0460392	0.0142569	0.0229087	0.0369501	0.0426328	0.0495924	0.0549675	0.0694672
2021-10-17	growth_rate	NA	estimate	0.0438227	0.0436522	0.0141144	0.0203978	0.034995	0.0404382	0.0472905	0.0524442	0.0666252
2021-10-18	growth_rate	NA	estimate	0.0418659	0.0414583	0.0140474	0.0178326	0.0326814	0.0384439	0.0452162	0.0503762	0.0639885
2021-10-19	growth_rate	NA	estimate	0.0399767	0.0395104	0.0140599	0.0156662	0.0309359	0.0366597	0.0432801	0.0484232	0.0622019
2021-10-20	growth_rate	NA	estimate	0.0382644	0.0378333	0.0141278	0.0134855	0.0291506	0.0349734	0.0414493	0.0472245	0.0603434
2021-10-21	growth_rate	NA	estimate	0.0367516	0.0364225	0.0142093	0.0124101	0.0275144	0.0333478	0.0401207	0.0455713	0.0592514
2021-10-22	growth_rate	NA	estimate	0.0356302	0.0352477	0.0142632	0.0111421	0.0261732	0.0321725	0.0388594	0.0443221	0.0587382
2021-10-23	growth_rate	NA	estimate	0.0344263	0.0342587	0.0142667	0.0112693	0.0249826	0.0308459	0.0377645	0.0432048	0.0574757
2021-10-24	growth_rate	NA	estimate	0.0332697	0.0333934	0.0142197	0.0103995	0.0240869	0.029703	0.0367695	0.0425122	0.0565194
2021-10-25	growth_rate	NA	estimate	0.0325367	0.0325853	0.014138	0.0100413	0.0233949	0.0289788	0.0358192	0.0415947	0.0557389
2021-10-26	growth_rate	NA	estimate	0.0315469	0.0317724	0.0140401	0.00891076	0.0224568	0.0284113	0.0348209	0.0403987	0.0550408
2021-10-27	growth_rate	NA	estimate	0.0306778	0.0309034	0.013938	0.00809341	0.0219218	0.0275671	0.0338663	0.0394217	0.0537713
2021-10-28	growth_rate	NA	estimate	0.0296985	0.029943	0.0138391	0.00807674	0.0210995	0.0264858	0.0328932	0.0385757	0.05263
2021-10-29	growth_rate	NA	estimate	0.028436	0.0288745	0.0137543	0.00703111	0.0200748	0.0254809	0.0319661	0.0377311	0.0512838
2021-10-30	growth_rate	NA	estimate	0.0274358	0.0276988	0.0137033	0.00562808	0.0190565	0.0243369	0.0305934	0.0365283	0.0500904
2021-10-31	growth_rate	NA	estimate	0.0262658	0.026431	0.0137079	0.00398918	0.0179802	0.0231564	0.029494	0.0351121	0.0490044
2021-11-01	growth_rate	NA	estimate	0.0250753	0.025094	0.0137765	0.00266326	0.0164938	0.0219099	0.0283969	0.0335217	0.0473405
2021-11-02	growth_rate	NA	estimate	0.0237145	0.0237116	0.0138928	0.000779806	0.0151988	0.0207212	0.0269864	0.0321491	0.0460424
2021-11-03	growth_rate	NA	estimate	0.0224759	0.0223002	0.0140186	-0.0010822	0.0139355	0.0194374	0.0255893	0.0308494	0.0454118
2021-11-04	growth_rate	NA	estimate	0.0212133	0.0208631	0.0141109	-0.00284085	0.0123523	0.0180379	0.024269	0.0296883	0.0437143
2021-11-05	growth_rate	NA	estimate	0.0197387	0.0193862	0.0141419	-0.00485666	0.0112243	0.016313	0.0229058	0.0282876	0.0421068
2021-11-06	growth_rate	NA	estimate	0.0179615	0.0178355	0.0141108	-0.00611476	0.00915854	0.0147882	0.0212208	0.027036	0.0404118
2021-11-07	growth_rate	NA	estimate	0.016178	0.0161582	0.014042	-0.00659841	0.00735542	0.0129779	0.0193574	0.0251681	0.0391626
2021-11-08	growth_rate	NA	estimate	0.0139057	0.0142857	0.0139699	-0.00840893	0.00528234	0.0108682	0.0172661	0.0230458	0.0375833
2021-11-09	growth_rate	NA	estimate	0.0115898	0.0121401	0.013919	-0.00998896	0.00312898	0.00847034	0.0148659	0.0207229	0.0357423
2021-11-10	growth_rate	NA	estimate	0.00910991	0.00964244	0.0138885	-0.0122379	0.000746345	0.00586022	0.0122471	0.0181256	0.0333973
2021-11-11	growth_rate	NA	estimate	0.00625356	0.00672379	0.0138524	-0.0151709	-0.00238364	0.00313456	0.00950003	0.0152358	0.0300395
2021-11-12	growth_rate	NA	estimate	0.00289676	0.00333652	0.0137765	-0.0182098	-0.00583536	-0.000291353	0.00635425	0.0117937	0.0260046
2021-11-13	growth_rate	NA	estimate	-0.000881987	-0.000535257	0.0136429	-0.0218456	-0.00954121	-0.00428234	0.00235298	0.00808877	0.0227211
2021-11-14	growth_rate	NA	estimate	-0.00531927	-0.00486809	0.0134687	-0.0263378	-0.0136907	-0.00854163	-0.00207996	0.00334316	0.0184603
2021-11-15	growth_rate	NA	estimate	-0.0101089	-0.00959615	0.0133061	-0.0306602	-0.0184503	-0.0131435	-0.00688068	-0.0013554	0.0132642
2021-11-16	growth_rate	NA	estimate	-0.0149893	-0.0146133	0.0132213	-0.0358558	-0.0233258	-0.0181818	-0.0118789	-0.00647527	0.00780246
2021-11-17	growth_rate	NA	estimate	-0.0200358	-0.0197797	0.0132603	-0.0410665	-0.0281403	-0.0231416	-0.0167647	-0.0115188	0.00235135
2021-11-18	growth_rate	NA	estimate	-0.02503	-0.0249327	0.0134213	-0.0469678	-0.0331423	-0.0279111	-0.0217459	-0.0164868	-0.00250975
2021-11-19	growth_rate	NA	estimate	-0.0293973	-0.0298989	0.0136538	-0.0532783	-0.0382422	-0.0324936	-0.0265688	-0.0212279	-0.00764744
2021-11-20	growth_rate	NA	estimate	-0.0338188	-0.0345079	0.0138814	-0.0588573	-0.0429242	-0.0368236	-0.0308064	-0.025535	-0.0125836
2021-11-21	growth_rate	NA	estimate	-0.037632	-0.0386045	0.0140339	-0.0636202	-0.0470831	-0.0410574	-0.0344728	-0.0292591	-0.0174244
2021-11-22	growth_rate	NA	estimate	-0.0410979	-0.0420605	0.0140702	-0.0671747	-0.0505787	-0.0446256	-0.0379201	-0.0326248	-0.0210531
2021-11-23	growth_rate	NA	estimate	-0.0437952	-0.044784	0.0139863	-0.0692497	-0.0531949	-0.0472018	-0.0407412	-0.0353487	-0.0238019
2021-11-24	growth_rate	NA	estimate	-0.0459229	-0.0467256	0.013813	-0.0711007	-0.0548708	-0.0492216	-0.0426721	-0.0374315	-0.0261257
2021-11-25	growth_rate	NA	estimate	-0.0470283	-0.0478828	0.0136055	-0.0718647	-0.0562185	-0.0503489	-0.0439984	-0.038658	-0.0271423
2021-11-26	growth_rate	NA	estimate	-0.0475735	-0.0482997	0.0134302	-0.0711404	-0.0567132	-0.0509515	-0.0444658	-0.0393859	-0.0273135
2021-11-27	growth_rate	NA	estimate	-0.0477489	-0.0480637	0.013348	-0.0704466	-0.0564794	-0.0511343	-0.0445453	-0.0394449	-0.0268731
2021-11-28	growth_rate	NA	estimate	-0.0474226	-0.0472985	0.0133977	-0.0692983	-0.0556804	-0.0504092	-0.0443306	-0.0386362	-0.025747
2021-11-29	growth_rate	NA	estimate	-0.0465256	-0.0461534	0.0135828	-0.068318	-0.0547853	-0.0495875	-0.0433013	-0.0376887	-0.0233502
2021-11-30	growth_rate	NA	estimate	-0.0452603	-0.0447906	0.0138664	-0.0669826	-0.0536019	-0.0484188	-0.0421991	-0.0364383	-0.0205033
2021-12-01	growth_rate	NA	estimate	-0.0441788	-0.0433701	0.0141808	-0.0649948	-0.052544	-0.047377	-0.040789	-0.0352148	-0.0179036
2021-12-02	growth_rate	NA	estimate	-0.0432102	-0.0420346	0.0144478	-0.0637978	-0.0514394	-0.0461398	-0.0396157	-0.0337379	-0.0164819
2021-12-03	growth_rate	NA	estimate	-0.0421431	-0.0408952	0.0146061	-0.0628381	-0.0502303	-0.045217	-0.0386829	-0.0320363	-0.0159225
2021-12-04	growth_rate	NA	estimate	-0.041067	-0.0400216	0.0146351	-0.0623586	-0.0493212	-0.0442368	-0.0378593	-0.0313705	-0.0145819
2021-12-05	growth_rate	NA	estimate	-0.0403019	-0.0394367	0.0145661	-0.0623868	-0.0488343	-0.0435382	-0.0369351	-0.0307228	-0.0138422
2021-12-06	growth_rate	NA	estimate	-0.0398836	-0.0391178	0.014473	-0.0623844	-0.0483827	-0.0429399	-0.0363142	-0.0303459	-0.014391
2021-12-07	growth_rate	NA	estimate	-0.0391039	-0.0390038	0.014441	-0.0625681	-0.0482318	-0.0425773	-0.0359389	-0.030181	-0.0142672
2021-12-08	growth_rate	NA	estimate	-0.039165	-0.039007	0.0145236	-0.0629979	-0.0479451	-0.0424549	-0.0355947	-0.0301652	-0.0149049
2021-12-09	growth_rate	NA	estimate	-0.0389023	-0.0390276	0.0147125	-0.0633024	-0.0480191	-0.0423575	-0.0353502	-0.0300628	-0.0150286
2021-12-10	growth_rate	NA	estimate	-0.0387269	-0.0389676	0.0149416	-0.0641561	-0.0482078	-0.0421594	-0.0350105	-0.0296298	-0.0150896
2021-12-11	growth_rate	NA	estimate	-0.0382903	-0.0387436	0.0151232	-0.0642739	-0.0479084	-0.041798	-0.0348882	-0.0291816	-0.0147608
2021-12-12	growth_rate	NA	estimate	-0.037572	-0.0382964	0.0151914	-0.0642986	-0.0473551	-0.0411311	-0.0342532	-0.028623	-0.0142487
2021-12-13	growth_rate	NA	estimate	-0.0369521	-0.0375977	0.0151312	-0.0642703	-0.0464147	-0.0402877	-0.033703	-0.0279161	-0.0141599
2021-12-14	growth_rate	NA	estimate	-0.0358364	-0.0366535	0.0149829	-0.0627526	-0.0453578	-0.0395499	-0.0326648	-0.0268038	-0.0135748
2021-12-15	growth_rate	NA	estimate	-0.0351457	-0.0355039	0.0148238	-0.0608731	-0.0441368	-0.0385194	-0.0316002	-0.0258644	-0.0123943
2021-12-16	growth_rate	NA	estimate	-0.0341207	-0.0342198	0.0147326	-0.0586505	-0.0431433	-0.0373233	-0.0303638	-0.0248926	-0.0107391
2021-12-17	growth_rate	NA	estimate	-0.03285	-0.0328959	0.0147548	-0.0562848	-0.0421394	-0.0363468	-0.0293649	-0.023799	-0.00907224
2021-12-18	growth_rate	NA	estimate	-0.0318699	-0.0316402	0.0148865	-0.0552991	-0.0410466	-0.0353851	-0.0285154	-0.0227138	-0.0075103
2021-12-19	growth_rate	NA	estimate	-0.030894	-0.0305621	0.0150867	-0.0541347	-0.0403023	-0.0344997	-0.0275383	-0.0215758	-0.00497838
2021-12-20	growth_rate	NA	estimate	-0.0301758	-0.029759	0.0153048	-0.0537267	-0.0398995	-0.033769	-0.026943	-0.0206721	-0.00321592
2021-12-21	growth_rate	NA	estimate	-0.0298678	-0.0293053	0.0155028	-0.0531618	-0.0395848	-0.0334921	-0.0266951	-0.0199862	-0.00271116
2021-12-22	growth_rate	NA	estimate	-0.030101	-0.0292445	0.0156605	-0.0534025	-0.0398154	-0.0335895	-0.0263293	-0.0200496	-0.00249783
2021-12-23	growth_rate	NA	estimate	-0.0304525	-0.0295846	0.0157688	-0.0537924	-0.04006	-0.0340587	-0.0265056	-0.0202498	-0.00235353
2021-12-24	growth_rate	NA	estimate	-0.0311039	-0.030298	0.0158214	-0.0553089	-0.0405719	-0.0348418	-0.0273198	-0.0208317	-0.00323692
2021-12-25	growth_rate	NA	estimate	-0.0322592	-0.031324	0.0158168	-0.055856	-0.0416177	-0.035725	-0.0283061	-0.0216007	-0.00488983
2021-12-26	growth_rate	NA	estimate	-0.0331006	-0.0325746	0.0157689	-0.0570447	-0.0428901	-0.0367787	-0.0295269	-0.0227287	-0.00661615
2021-12-27	growth_rate	NA	estimate	-0.034234	-0.0339409	0.0157182	-0.059534	-0.0441529	-0.0378835	-0.0306544	-0.0239912	-0.00760387
2021-12-28	growth_rate	NA	estimate	-0.0355954	-0.0353015	0.0157306	-0.0612395	-0.0452198	-0.0388929	-0.0315327	-0.0252036	-0.00923473
2021-12-29	growth_rate	NA	estimate	-0.0363621	-0.0365307	0.015877	-0.0631841	-0.0466146	-0.040181	-0.0324861	-0.0257291	-0.01081
2021-12-30	growth_rate	NA	estimate	-0.0368509	-0.037506	0.0161989	-0.0648424	-0.0479373	-0.0409487	-0.0329031	-0.0268667	-0.0121673
2021-12-31	growth_rate	NA	estimate	-0.0374466	-0.0381145	0.0166816	-0.0669498	-0.0488275	-0.041406	-0.0334009	-0.0269858	-0.0120698
2022-01-01	growth_rate	NA	estimate	-0.0372951	-0.0382571	0.0172555	-0.0683783	-0.0493479	-0.0419391	-0.0333084	-0.0267226	-0.0114191
2022-01-02	growth_rate	NA	estimate	-0.037084	-0.0378502	0.0178241	-0.0682272	-0.0490766	-0.0413812	-0.0325904	-0.0255347	-0.00996606
2022-01-03	growth_rate	NA	estimate	-0.036133	-0.0368265	0.0183049	-0.0680898	-0.0484538	-0.0403681	-0.0316783	-0.0247002	-0.00807032
2022-01-04	growth_rate	NA	estimate	-0.0344637	-0.0351341	0.0186671	-0.0670366	-0.0467729	-0.038989	-0.0300691	-0.0226603	-0.00522554
2022-01-05	growth_rate	NA	estimate	-0.0323323	-0.0327362	0.0189656	-0.0644937	-0.0444847	-0.0370348	-0.0277255	-0.0204335	-0.00253998
2022-01-06	growth_rate	NA	estimate	-0.0293238	-0.0296105	0.0193726	-0.0621782	-0.0420383	-0.0343018	-0.0246171	-0.0166899	0.00229857
2022-01-07	growth_rate	NA	estimate	-0.025976	-0.025749	0.0202016	-0.0586935	-0.0389057	-0.0308773	-0.0207399	-0.0124194	0.00753504
2022-01-08	growth_rate	NA	estimate	-0.0212859	-0.0211571	0.0218946	-0.0566592	-0.0354362	-0.0265606	-0.0159682	-0.00690542	0.0151475
2022-01-09	growth_rate	NA	estimate	-0.0158985	-0.015853	0.0249337	-0.0565618	-0.0328445	-0.0221803	-0.00975085	0.00103123	0.024674
2022-01-10	growth_rate	NA	estimate based on partial data	-0.0100233	-0.00986639	0.0297018	-0.0574306	-0.0304751	-0.0178437	-0.00251368	0.0107804	0.0382824
2022-01-11	growth_rate	NA	estimate based on partial data	-0.00352063	-0.00323723	0.0364019	-0.0612857	-0.0284541	-0.0133829	0.00531066	0.0215624	0.056445
2022-01-12	growth_rate	NA	estimate based on partial data	0.00225143	0.00398356	0.045079	-0.0658137	-0.0273639	-0.00886688	0.0134175	0.0342924	0.080489
2022-01-13	growth_rate	NA	estimate based on partial data	0.00754645	0.0117331	0.0556777	-0.0727901	-0.0263054	-0.00564253	0.0218324	0.0479997	0.107337
2022-01-14	growth_rate	NA	estimate based on partial data	0.0131338	0.0199354	0.0680841	-0.079955	-0.0269485	-0.00266256	0.0300521	0.0613493	0.138915
2022-01-15	growth_rate	NA	estimate based on partial data	0.0185898	0.0285015	0.0821489	-0.0894445	-0.0278277	0.000487179	0.0387623	0.0777807	0.174265
2022-01-16	growth_rate	NA	estimate based on partial data	0.0245567	0.0373336	0.0977031	-0.0985869	-0.0291516	0.00305362	0.0469395	0.0936525	0.214667
2022-01-17	growth_rate	NA	estimate based on partial data	0.0289407	0.0463323	0.114573	-0.107598	-0.0303415	0.00463688	0.0560242	0.107565	0.259909
2022-01-18	growth_rate	NA	estimate based on partial data	0.0331614	0.0554064	0.132599	-0.118561	-0.0325509	0.00598793	0.0631717	0.12276	0.306843
2021-08-17	doubling_time	NA	estimate	2.51018	2.56513	NA	25.5518	4.02015	2.91444	2.23306	1.88267	1.40964
2021-08-18	doubling_time	NA	estimate	3.17602	3.29802	NA	40.462	4.96407	3.61669	2.83651	2.43235	1.85777
2021-08-19	doubling_time	NA	estimate	4.25466	4.52002	NA	86.8915	6.60641	4.84239	3.8503	3.34351	2.58134
2021-08-20	doubling_time	NA	estimate	6.37399	6.87241	NA	-366.032	9.93044	7.25893	5.82477	5.05954	3.89605
2021-08-21	doubling_time	NA	estimate	12.1374	12.9441	NA	-54.2296	20.0151	14.0518	10.7847	9.07892	6.70521
2021-08-22	doubling_time	NA	estimate	54.6773	57.9054	NA	-24.2845	-252.14	100.26	37.8829	25.605	13.9088
2021-08-23	doubling_time	NA	estimate	-31.0675	-29.3434	NA	-11.3129	-18.5828	-25.0079	-40.0528	-77.2703	74.7223
2021-08-24	doubling_time	NA	estimate	-13.9401	-13.0241	NA	-7.03219	-10.0174	-12.2697	-15.7778	-19.6076	-39.5837
2021-08-25	doubling_time	NA	estimate	-9.39637	-9.00222	NA	-5.39813	-7.126	-8.45994	-10.5548	-12.8463	-19.9731
2021-08-26	doubling_time	NA	estimate	-7.40539	-7.27822	NA	-4.609	-5.84356	-6.72858	-8.20847	-9.97514	-14.9725
2021-08-27	doubling_time	NA	estimate	-6.39566	-6.40185	NA	-4.21404	-5.20387	-5.87719	-7.01501	-8.43774	-12.782
2021-08-28	doubling_time	NA	estimate	-5.86876	-5.95163	NA	-4.05573	-4.9063	-5.45256	-6.38367	-7.6009	-11.642
2021-08-29	doubling_time	NA	estimate	-5.65965	-5.76826	NA	-4.05219	-4.81618	-5.28533	-6.08856	-7.11019	-11.0324
2021-08-30	doubling_time	NA	estimate	-5.6673	-5.78851	NA	-4.20606	-4.91763	-5.33801	-6.03922	-6.92251	-10.5667
2021-08-31	doubling_time	NA	estimate	-5.86028	-5.99623	NA	-4.48288	-5.17625	-5.5698	-6.1984	-6.97666	-10.3405
2021-09-01	doubling_time	NA	estimate	-6.29594	-6.40775	NA	-4.90002	-5.60406	-6.00533	-6.61899	-7.34231	-10.423
2021-09-02	doubling_time	NA	estimate	-7.00353	-7.07201	NA	-5.41919	-6.20007	-6.67572	-7.33976	-8.07199	-10.9481
2021-09-03	doubling_time	NA	estimate	-7.99599	-8.08259	NA	-6.05043	-7.00129	-7.57153	-8.44399	-9.3503	-13.285
2021-09-04	doubling_time	NA	estimate	-9.40001	-9.60725	NA	-6.85052	-8.01365	-8.77482	-10.0082	-11.4678	-19.2259
2021-09-05	doubling_time	NA	estimate	-11.2752	-11.9546	NA	-7.77306	-9.34162	-10.4278	-12.4699	-15.2359	-45.8971
2021-09-06	doubling_time	NA	estimate	-14.2798	-15.7363	NA	-8.90744	-11.054	-12.7303	-16.5444	-22.9794	141.306
2021-09-07	doubling_time	NA	estimate	-19.4253	-22.3282	NA	-10.325	-13.3361	-16.2472	-24.2261	-46.26	32.4682
2021-09-08	doubling_time	NA	estimate	-29.1053	-35.554	NA	-12.144	-16.848	-22.078	-44.7016	-353.276	21.421
2021-09-09	doubling_time	NA	estimate	-54.2401	-71.4029	NA	-14.4551	-22.3817	-33.5279	-144.1	82.724	17.4429
2021-09-10	doubling_time	NA	estimate	-166.05	-396.274	NA	-17.8654	-32.0555	-62.712	186.157	44.7188	15.7349
2021-09-11	doubling_time	NA	estimate	262.609	153.515	NA	-22.2632	-52.652	-189.039	72.4054	34.2662	15.0129
2021-09-12	doubling_time	NA	estimate	82.1085	73.9701	NA	-28.5848	-100.715	294.001	48.4085	28.7908	14.8924
2021-09-13	doubling_time	NA	estimate	54.0242	52.5693	NA	-35.9086	-455.306	96.2924	38.1802	25.239	14.4355
2021-09-14	doubling_time	NA	estimate	41.7578	42.3984	NA	-42.9872	274.548	62.8753	32.1564	22.857	13.9979
2021-09-15	doubling_time	NA	estimate	35.1348	36.0639	NA	-46.564	116.433	47.2032	27.8297	20.8085	13.3464
2021-09-16	doubling_time	NA	estimate	29.9846	31.3685	NA	-52.3007	72.0456	38.666	24.6115	19.1176	12.8546
2021-09-17	doubling_time	NA	estimate	26.3858	27.5145	NA	-60.186	52.6029	32.6259	22.2797	17.5014	12.2396
2021-09-18	doubling_time	NA	estimate	23.3005	24.2154	NA	-90.114	42.1989	28.0067	19.9547	16.1179	11.7206
2021-09-19	doubling_time	NA	estimate	20.7213	21.3815	NA	-407.076	33.8534	24.3564	17.9959	15.0169	11.1463
2021-09-20	doubling_time	NA	estimate	18.4748	18.9839	NA	168.414	27.8148	21.3158	16.4152	14.0455	10.6429
2021-09-21	doubling_time	NA	estimate	16.664	16.9987	NA	70.1115	23.5529	18.7783	15.1302	13.1147	10.0494
2021-09-22	doubling_time	NA	estimate	15.2836	15.3911	NA	46.8425	20.2825	16.8908	13.9721	12.2234	9.45246
2021-09-23	doubling_time	NA	estimate	14.1235	14.1174	NA	35.626	18.1008	15.4445	13.0203	11.4865	8.93226
2021-09-24	doubling_time	NA	estimate	13.1874	13.13	NA	28.9855	16.7428	14.2727	12.2173	10.8904	8.48948
2021-09-25	doubling_time	NA	estimate	12.4861	12.3826	NA	24.58	15.5783	13.4994	11.6164	10.3836	8.1374
2021-09-26	doubling_time	NA	estimate	11.9586	11.8326	NA	22.0953	14.7552	12.8671	11.1745	10.0397	7.84722
2021-09-27	doubling_time	NA	estimate	11.5374	11.4417	NA	20.3746	14.146	12.4376	10.7991	9.74281	7.68241
2021-09-28	doubling_time	NA	estimate	11.2592	11.1764	NA	19.7534	13.6583	12.113	10.5658	9.54224	7.61142
2021-09-29	doubling_time	NA	estimate	11.0745	11.0072	NA	19.0337	13.4034	11.8194	10.4144	9.37908	7.58767
2021-09-30	doubling_time	NA	estimate	10.978	10.9087	NA	19.0179	13.1614	11.7019	10.2787	9.33062	7.57542
2021-10-01	doubling_time	NA	estimate	10.9183	10.8594	NA	18.8107	13.0376	11.5363	10.2821	9.29156	7.59682
2021-10-02	doubling_time	NA	estimate	10.8611	10.8427	NA	18.8437	12.9089	11.5173	10.2815	9.31797	7.63978
2021-10-03	doubling_time	NA	estimate	10.8772	10.8475	NA	18.6531	12.8229	11.542	10.2515	9.35836	7.70101
2021-10-04	doubling_time	NA	estimate	10.8465	10.8682	NA	18.6469	12.9013	11.5521	10.2264	9.3789	7.76089
2021-10-05	doubling_time	NA	estimate	10.8376	10.9056	NA	18.5013	12.8915	11.5308	10.2828	9.44155	7.7832
2021-10-06	doubling_time	NA	estimate	10.9273	10.9652	NA	18.2783	12.9172	11.6047	10.3643	9.55734	7.85793
2021-10-07	doubling_time	NA	estimate	11.0403	11.0568	NA	18.332	12.9645	11.6951	10.4814	9.63955	7.88331
2021-10-08	doubling_time	NA	estimate	11.1944	11.1927	NA	18.605	13.2021	11.8706	10.6108	9.7686	7.97819
2021-10-09	doubling_time	NA	estimate	11.4155	11.386	NA	18.996	13.4715	12.149	10.7998	9.91412	8.03107
2021-10-10	doubling_time	NA	estimate	11.7659	11.6492	NA	19.6198	13.8602	12.4948	11.0887	10.1168	8.14377
2021-10-11	doubling_time	NA	estimate	12.1025	11.9933	NA	20.5266	14.3196	12.9248	11.4208	10.3474	8.37246
2021-10-12	doubling_time	NA	estimate	12.5529	12.4267	NA	21.7923	15.0172	13.3983	11.8059	10.6634	8.60438
2021-10-13	doubling_time	NA	estimate	13.0779	12.9537	NA	22.9592	15.7832	13.9846	12.2417	11.0711	8.92928
2021-10-14	doubling_time	NA	estimate	13.6631	13.5737	NA	25.2771	16.6865	14.6416	12.7827	11.5393	9.21594
2021-10-15	doubling_time	NA	estimate	14.3723	14.2794	NA	27.6712	17.7004	15.4485	13.3518	12.0599	9.53566
2021-10-16	doubling_time	NA	estimate	15.0802	15.0556	NA	30.2569	18.759	16.2585	13.9769	12.6101	9.97805
2021-10-17	doubling_time	NA	estimate	15.8171	15.8788	NA	33.9814	19.8071	17.1409	14.6572	13.2169	10.4037
2021-10-18	doubling_time	NA	estimate	16.5564	16.7192	NA	38.8696	21.2093	18.0301	15.3296	13.7594	10.8324
2021-10-19	doubling_time	NA	estimate	17.3388	17.5434	NA	44.2447	22.4059	18.9076	16.0154	14.3144	11.1435
2021-10-20	doubling_time	NA	estimate	18.1147	18.3211	NA	51.3993	23.7782	19.8193	16.7228	14.6777	11.4867
2021-10-21	doubling_time	NA	estimate	18.8604	19.0307	NA	55.8536	25.1922	20.7854	17.2765	15.2102	11.6984
2021-10-22	doubling_time	NA	estimate	19.4539	19.665	NA	62.2095	26.4831	21.5447	17.8373	15.6389	11.8006
2021-10-23	doubling_time	NA	estimate	20.1342	20.2327	NA	61.5076	27.7452	22.4713	18.3544	16.0433	12.0598
2021-10-24	doubling_time	NA	estimate	20.8342	20.757	NA	66.652	28.7769	23.3359	18.8512	16.3047	12.2639
2021-10-25	doubling_time	NA	estimate	21.3036	21.2718	NA	69.0295	29.6282	23.9191	19.3513	16.6643	12.4356
2021-10-26	doubling_time	NA	estimate	21.9719	21.816	NA	77.7877	30.8658	24.3969	19.9061	17.1576	12.5933
2021-10-27	doubling_time	NA	estimate	22.5944	22.4295	NA	85.6434	31.6191	25.144	20.4672	17.5829	12.8906
2021-10-28	doubling_time	NA	estimate	23.3395	23.1489	NA	85.8202	32.8513	26.1705	21.0727	17.9685	13.1702
2021-10-29	doubling_time	NA	estimate	24.3757	24.0055	NA	98.5829	34.5283	27.2026	21.6838	18.3707	13.5159
2021-10-30	doubling_time	NA	estimate	25.2643	25.0244	NA	123.159	36.3732	28.4814	22.6568	18.9756	13.8379
2021-10-31	doubling_time	NA	estimate	26.3898	26.2248	NA	173.757	38.5506	29.9333	23.5013	19.741	14.1446
2021-11-01	doubling_time	NA	estimate	27.6427	27.622	NA	260.263	42.0247	31.6362	24.4092	20.6776	14.6417
2021-11-02	doubling_time	NA	estimate	29.2288	29.2324	NA	888.871	45.6053	33.4511	25.6851	21.5604	15.0545
2021-11-03	doubling_time	NA	estimate	30.8396	31.0826	NA	-640.498	49.7398	35.6606	27.0874	22.4687	15.2636
2021-11-04	doubling_time	NA	estimate	32.6752	33.2235	NA	-243.993	56.1146	38.4273	28.561	23.3475	15.8563
2021-11-05	doubling_time	NA	estimate	35.1162	35.7546	NA	-142.721	61.7543	42.4906	30.2608	24.5036	16.4617
2021-11-06	doubling_time	NA	estimate	38.5908	38.8633	NA	-113.356	75.6831	46.8716	32.6636	25.6379	17.1521
2021-11-07	doubling_time	NA	estimate	42.8451	42.8976	NA	-105.048	94.2362	53.4097	35.8079	27.5407	17.6992
2021-11-08	doubling_time	NA	estimate	49.8461	48.5202	NA	-82.4299	131.22	63.7776	40.1449	30.0769	18.4429
2021-11-09	doubling_time	NA	estimate	59.8065	57.0957	NA	-69.3913	221.525	81.8323	46.6267	33.4484	19.3929
2021-11-10	doubling_time	NA	estimate	76.0872	71.885	NA	-56.6395	928.723	118.28	56.5967	38.2414	20.7546
2021-11-11	doubling_time	NA	estimate	110.84	103.089	NA	-45.6891	-290.793	221.13	72.9626	45.4948	23.0745
2021-11-12	doubling_time	NA	estimate	239.284	207.746	NA	-38.0644	-118.784	-2379.06	109.084	58.7725	26.6548
2021-11-13	doubling_time	NA	estimate	-785.893	-1294.98	NA	-31.7294	-72.6477	-161.862	294.583	85.6925	30.5068
2021-11-14	doubling_time	NA	estimate	-130.309	-142.386	NA	-26.3176	-50.6289	-81.1493	-333.25	207.333	37.548
2021-11-15	doubling_time	NA	estimate	-68.5682	-72.2318	NA	-22.6074	-37.5683	-52.7368	-100.738	-511.397	52.2569
2021-11-16	doubling_time	NA	estimate	-46.2426	-47.4327	NA	-19.3315	-29.7159	-38.1231	-58.3509	-107.045	88.837
2021-11-17	doubling_time	NA	estimate	-34.5954	-35.0434	NA	-16.8787	-24.6318	-29.9524	-41.3457	-60.175	294.786
2021-11-18	doubling_time	NA	estimate	-27.6927	-27.8008	NA	-14.7579	-20.9143	-24.8341	-31.8749	-42.0424	-276.181
2021-11-19	doubling_time	NA	estimate	-23.5786	-23.183	NA	-13.0099	-18.1252	-21.3318	-26.0888	-32.6526	-90.6378
2021-11-20	doubling_time	NA	estimate	-20.4959	-20.0867	NA	-11.7768	-16.1482	-18.8235	-22.5001	-27.145	-55.0832
2021-11-21	doubling_time	NA	estimate	-18.4191	-17.9551	NA	-10.8951	-14.7218	-16.8824	-20.1071	-23.69	-39.7802
2021-11-22	doubling_time	NA	estimate	-16.8657	-16.4798	NA	-10.3186	-13.7043	-15.5325	-18.2791	-21.246	-32.9238
2021-11-23	doubling_time	NA	estimate	-15.827	-15.4776	NA	-10.0094	-13.0303	-14.6848	-17.0134	-19.6088	-29.1215
2021-11-24	doubling_time	NA	estimate	-15.0937	-14.8344	NA	-9.74881	-12.6323	-14.0822	-16.2436	-18.5178	-26.5312
2021-11-25	doubling_time	NA	estimate	-14.739	-14.4759	NA	-9.64516	-12.3295	-13.7669	-15.7539	-17.9302	-25.5375
2021-11-26	doubling_time	NA	estimate	-14.57	-14.351	NA	-9.74337	-12.222	-13.6041	-15.5883	-17.5989	-25.3774
2021-11-27	doubling_time	NA	estimate	-14.5165	-14.4214	NA	-9.83933	-12.2726	-13.5554	-15.5605	-17.5725	-25.7934
2021-11-28	doubling_time	NA	estimate	-14.6164	-14.6548	NA	-10.0024	-12.4487	-13.7504	-15.6358	-17.9404	-26.9215
2021-11-29	doubling_time	NA	estimate	-14.8982	-15.0183	NA	-10.1459	-12.6521	-13.9783	-16.0075	-18.3914	-29.6848
2021-11-30	doubling_time	NA	estimate	-15.3147	-15.4753	NA	-10.3482	-12.9314	-14.3156	-16.4256	-19.0225	-33.8065
2021-12-01	doubling_time	NA	estimate	-15.6896	-15.9821	NA	-10.6647	-13.1917	-14.6305	-16.9935	-19.6834	-38.7156
2021-12-02	doubling_time	NA	estimate	-16.0413	-16.4899	NA	-10.8648	-13.475	-15.0228	-17.4968	-20.5451	-42.0551
2021-12-03	doubling_time	NA	estimate	-16.4475	-16.9494	NA	-11.0307	-13.7994	-15.3293	-17.9187	-21.6363	-43.5324
2021-12-04	doubling_time	NA	estimate	-16.8784	-17.3193	NA	-11.1155	-14.0537	-15.669	-18.3085	-22.0955	-47.5347
2021-12-05	doubling_time	NA	estimate	-17.1989	-17.5762	NA	-11.1105	-14.1938	-15.9204	-18.7666	-22.5613	-50.075
2021-12-06	doubling_time	NA	estimate	-17.3792	-17.7195	NA	-11.1109	-14.3263	-16.1423	-19.0875	-22.8415	-48.1653
2021-12-07	doubling_time	NA	estimate	-17.7258	-17.7713	NA	-11.0783	-14.3712	-16.2797	-19.2868	-22.9663	-48.5834
2021-12-08	doubling_time	NA	estimate	-17.6981	-17.7698	NA	-11.0027	-14.4571	-16.3267	-19.4734	-22.9784	-46.5047
2021-12-09	doubling_time	NA	estimate	-17.8176	-17.7604	NA	-10.9498	-14.4348	-16.3642	-19.608	-23.0566	-46.1219
2021-12-10	doubling_time	NA	estimate	-17.8983	-17.7878	NA	-10.8041	-14.3783	-16.4411	-19.7983	-23.3936	-45.9354
2021-12-11	doubling_time	NA	estimate	-18.1024	-17.8906	NA	-10.7843	-14.4682	-16.5833	-19.8677	-23.7529	-46.9587
2021-12-12	doubling_time	NA	estimate	-18.4485	-18.0995	NA	-10.7801	-14.6372	-16.8521	-20.236	-24.2164	-48.6462
2021-12-13	doubling_time	NA	estimate	-18.758	-18.4359	NA	-10.7849	-14.9338	-17.2049	-20.5663	-24.8297	-48.9513
2021-12-14	doubling_time	NA	estimate	-19.342	-18.9108	NA	-11.0457	-15.2818	-17.5259	-21.22	-25.8601	-51.0615
2021-12-15	doubling_time	NA	estimate	-19.7221	-19.5231	NA	-11.3868	-15.7045	-17.9947	-21.9349	-26.7993	-55.9248
2021-12-16	doubling_time	NA	estimate	-20.3146	-20.2557	NA	-11.8183	-16.0662	-18.5715	-22.8281	-27.8455	-64.5442
2021-12-17	doubling_time	NA	estimate	-21.1004	-21.071	NA	-12.315	-16.4489	-19.0704	-23.6046	-29.1251	-76.4031
2021-12-18	doubling_time	NA	estimate	-21.7492	-21.9071	NA	-12.5345	-16.8869	-19.5887	-24.3078	-30.5165	-92.2929
2021-12-19	doubling_time	NA	estimate	-22.4363	-22.6799	NA	-12.8041	-17.1987	-20.0914	-25.1703	-32.1262	-139.232
2021-12-20	doubling_time	NA	estimate	-22.9703	-23.292	NA	-12.9013	-17.3723	-20.5262	-25.7264	-33.5306	-215.536
2021-12-21	doubling_time	NA	estimate	-23.2071	-23.6526	NA	-13.0385	-17.5104	-20.6958	-25.9654	-34.6812	-255.664
2021-12-22	doubling_time	NA	estimate	-23.0274	-23.7018	NA	-12.9797	-17.409	-20.6358	-26.3261	-34.5717	-277.5
2021-12-23	doubling_time	NA	estimate	-22.7616	-23.4293	NA	-12.8856	-17.3027	-20.3515	-26.151	-34.2298	-294.514
2021-12-24	doubling_time	NA	estimate	-22.2849	-22.8777	NA	-12.5323	-17.0844	-19.8941	-25.3716	-33.2737	-214.138
2021-12-25	doubling_time	NA	estimate	-21.4868	-22.1283	NA	-12.4095	-16.6551	-19.4023	-24.4876	-32.0891	-141.753
2021-12-26	doubling_time	NA	estimate	-20.9406	-21.2788	NA	-12.151	-16.161	-18.8464	-23.4751	-30.4965	-104.766
2021-12-27	doubling_time	NA	estimate	-20.2473	-20.4222	NA	-11.6429	-15.6988	-18.2968	-22.6117	-28.8917	-91.1571
2021-12-28	doubling_time	NA	estimate	-19.4729	-19.6351	NA	-11.3186	-15.3284	-17.8219	-21.9819	-27.5019	-75.0587
2021-12-29	doubling_time	NA	estimate	-19.0624	-18.9744	NA	-10.9703	-14.8697	-17.2506	-21.3367	-26.9402	-64.1207
2021-12-30	doubling_time	NA	estimate	-18.8095	-18.481	NA	-10.6897	-14.4595	-16.9272	-21.0663	-25.7995	-56.968
2021-12-31	doubling_time	NA	estimate	-18.5103	-18.1859	NA	-10.3532	-14.1958	-16.7403	-20.7524	-25.6856	-57.4281
2022-01-01	doubling_time	NA	estimate	-18.5855	-18.1182	NA	-10.137	-14.0461	-16.5275	-20.81	-25.9386	-60.7006
2022-01-02	doubling_time	NA	estimate	-18.6913	-18.3129	NA	-10.1594	-14.1238	-16.7503	-21.2684	-27.1453	-69.5508
2022-01-03	doubling_time	NA	estimate	-19.1832	-18.822	NA	-10.1799	-14.3053	-17.1707	-21.8808	-28.0624	-85.8885
2022-01-04	doubling_time	NA	estimate	-20.1124	-19.7286	NA	-10.3398	-14.8194	-17.778	-23.0518	-30.5886	-132.646
2022-01-05	doubling_time	NA	estimate	-21.4382	-21.1737	NA	-10.7475	-15.5817	-18.7161	-25.0003	-33.9221	-272.894
2022-01-06	doubling_time	NA	estimate	-23.6377	-23.4088	NA	-11.1477	-16.4885	-20.2073	-28.1572	-41.531	301.556
2022-01-07	doubling_time	NA	estimate	-26.6841	-26.9194	NA	-11.8096	-17.8161	-22.4484	-33.421	-55.8118	91.9898
2022-01-08	doubling_time	NA	estimate	-32.5636	-32.762	NA	-12.2336	-19.5604	-26.0968	-43.408	-100.377	45.7597
2022-01-09	doubling_time	NA	estimate	-43.5982	-43.7233	NA	-12.2547	-21.1039	-31.2506	-71.0858	672.158	28.0922
2022-01-10	doubling_time	NA	estimate based on partial data	-69.1535	-70.2534	NA	-12.0693	-22.7447	-38.8455	-275.75	64.2971	18.1062
2022-01-11	doubling_time	NA	estimate based on partial data	-196.882	-214.117	NA	-11.3101	-24.3602	-51.7934	130.52	32.1461	12.28
2022-01-12	doubling_time	NA	estimate based on partial data	307.87	174.002	NA	-10.532	-25.3308	-78.1726	51.6599	20.2128	8.61171
2022-01-13	doubling_time	NA	estimate based on partial data	91.8507	59.0762	NA	-9.52255	-26.35	-122.843	31.7486	14.4406	6.45764
2022-01-14	doubling_time	NA	estimate based on partial data	52.7757	34.7697	NA	-8.66921	-25.7211	-260.332	23.0648	11.2984	4.98973
2022-01-15	doubling_time	NA	estimate based on partial data	37.2864	24.3197	NA	-7.74947	-24.9086	1422.78	17.882	8.91155	3.97755
2022-01-16	doubling_time	NA	estimate based on partial data	28.2264	18.5663	NA	-7.03082	-23.7773	226.992	14.7668	7.40127	3.22894
2022-01-17	doubling_time	NA	estimate based on partial data	23.9506	14.9603	NA	-6.442	-22.8449	149.486	12.3723	6.44401	2.66689
2022-01-18	doubling_time	NA	estimate based on partial data	20.9022	12.5102	NA	-5.84635	-21.2943	115.757	10.9724	5.64636	2.25896
2021-08-17	infections	NA	estimate	63.5564	63.8974	11.0117	46.488	55.9877	60.7265	66.5201	71.3954	82.4852
2021-08-18	infections	NA	estimate	69.7566	70.1969	13.6017	48.6563	60.3136	66.3778	73.3253	79.4368	93.2678
2021-08-19	infections	NA	estimate	74.2164	74.2324	15.6658	49.2328	62.8144	70.0159	78.0515	84.9441	100.604
2021-08-20	infections	NA	estimate	74.4518	74.0223	15.5024	48.4191	62.8965	70.2912	78.2876	84.616	99.2372
2021-08-21	infections	NA	estimate	70.6076	69.8586	13.3871	46.7195	60.536	67.1071	73.8718	79.1321	91.2352
2021-08-22	infections	NA	estimate	63.6821	63.0955	10.4318	44.4789	56.2326	61.1491	66.3138	70.2599	79.4772
2021-08-23	infections	NA	estimate	55.547	55.2436	7.73397	41.9699	50.3144	53.3715	57.2772	60.3457	67.7162
2021-08-24	infections	NA	estimate	47.3291	47.4398	5.96688	37.5936	43.3926	45.8443	48.7803	51.4642	57.3398
2021-08-25	infections	NA	estimate	40.3559	40.4029	5.19623	32.0449	36.96	38.9965	41.6449	43.8515	49.0329
2021-08-26	infections	NA	estimate	34.5364	34.4149	4.98127	26.0803	31.0421	33.2388	35.6978	37.7598	42.5372
2021-08-27	infections	NA	estimate	29.6453	29.5071	4.88584	21.2795	26.1788	28.3918	30.9116	32.9307	37.3185
2021-08-28	infections	NA	estimate	25.6627	25.5835	4.72077	17.8869	22.2104	24.3317	26.9594	28.9847	33.0747
2021-08-29	infections	NA	estimate	22.4547	22.5015	4.45347	15.5091	19.1836	21.1505	23.7904	25.8051	29.8013
2021-08-30	infections	NA	estimate	19.889	20.1151	4.10637	13.7986	17.0129	18.7843	21.1451	23.1299	27.1358
2021-08-31	infections	NA	estimate	17.9634	18.2948	3.71232	12.7355	15.4483	17.0192	19.0892	20.8931	24.8154
2021-09-01	infections	NA	estimate	16.5655	16.9329	3.30153	12.0876	14.4268	15.7215	17.5504	19.1083	22.9607
2021-09-02	infections	NA	estimate	15.6002	15.9159	2.92691	11.6868	13.7636	14.8474	16.3662	17.7857	21.4214
2021-09-03	infections	NA	estimate	14.9167	15.2013	2.59239	11.4658	13.3251	14.259	15.5553	16.7827	20.0928
2021-09-04	infections	NA	estimate	14.4764	14.7336	2.32383	11.4037	13.0562	13.9254	15.0725	16.1647	19.0219
2021-09-05	infections	NA	estimate	14.2111	14.4708	2.14274	11.3629	12.9423	13.7281	14.8065	15.8179	18.3407
2021-09-06	infections	NA	estimate	14.1762	14.3771	2.0592	11.3868	12.9011	13.6763	14.7107	15.6434	18.0411
2021-09-07	infections	NA	estimate	14.2457	14.4187	2.06067	11.4252	12.9389	13.7163	14.7677	15.6788	18.1042
2021-09-08	infections	NA	estimate	14.3448	14.5623	2.11172	11.5363	13.0643	13.8589	14.8753	15.8384	18.3834
2021-09-09	infections	NA	estimate	14.5457	14.7772	2.17016	11.6795	13.2371	14.027	15.0805	16.0659	18.7443
2021-09-10	infections	NA	estimate	14.8009	15.0383	2.20536	11.8939	13.4701	14.2922	15.3463	16.3464	19.0307
2021-09-11	infections	NA	estimate	15.1149	15.3303	2.20659	12.1981	13.772	14.5826	15.6524	16.6073	19.3155
2021-09-12	infections	NA	estimate	15.4362	15.6481	2.18124	12.5228	14.0979	14.9133	16.0039	16.9311	19.5971
2021-09-13	infections	NA	estimate	15.7949	15.9964	2.14726	12.8769	14.457	15.3154	16.3538	17.2935	19.8688
2021-09-14	infections	NA	estimate	16.2463	16.3873	2.12391	13.2566	14.8912	15.7138	16.7533	17.6575	20.1061
2021-09-15	infections	NA	estimate	16.7245	16.837	2.12401	13.5641	15.338	16.1767	17.2203	18.1436	20.5631
2021-09-16	infections	NA	estimate	17.2256	17.3634	2.15094	14.0239	15.8805	16.7237	17.788	18.7682	21.0305
2021-09-17	infections	NA	estimate	17.8728	17.9848	2.20063	14.5485	16.4621	17.329	18.4418	19.3833	21.777
2021-09-18	infections	NA	estimate	18.6133	18.7189	2.26577	15.1573	17.1456	18.0364	19.1951	20.1354	22.6146
2021-09-19	infections	NA	estimate	19.4668	19.5817	2.33966	15.9439	17.9832	18.8955	20.0469	21.0724	23.5827
2021-09-20	infections	NA	estimate	20.4765	20.5875	2.41864	16.8362	18.948	19.847	21.0492	22.1485	24.6808
2021-09-21	infections	NA	estimate	21.6376	21.7481	2.50314	17.824	20.0352	20.9629	22.2383	23.3641	26.0058
2021-09-22	infections	NA	estimate	22.9322	23.0721	2.59715	18.9947	21.2604	22.2843	23.5765	24.7667	27.4743
2021-09-23	infections	NA	estimate	24.4245	24.5647	2.70624	20.3545	22.6723	23.7229	25.1027	26.3117	29.1633
2021-09-24	infections	NA	estimate	26.0827	26.2274	2.83468	21.7543	24.2763	25.353	26.8039	28.0953	31.0778
2021-09-25	infections	NA	estimate	27.8929	28.0587	2.98366	23.3933	25.9755	27.1115	28.7078	30.0328	33.2157
2021-09-26	infections	NA	estimate	29.9019	30.0554	3.15173	25.1895	27.8511	29.0967	30.695	32.0674	35.4454
2021-09-27	infections	NA	estimate	32.0117	32.2145	3.33687	27.124	29.878	31.1762	32.8996	34.3377	38.044
2021-09-28	infections	NA	estimate	34.3828	34.5351	3.53804	29.1783	32.0794	33.4436	35.2436	36.7485	40.7138
2021-09-29	infections	NA	estimate	36.8561	37.0194	3.75569	31.3424	34.4426	35.8524	37.7936	39.3722	43.5192
2021-09-30	infections	NA	estimate	39.4705	39.6734	3.99141	33.5482	36.8996	38.4278	40.507	42.1781	46.5294
2021-10-01	infections	NA	estimate	42.3541	42.5068	4.24683	36.0267	39.4731	41.2267	43.4449	45.2042	49.8877
2021-10-02	infections	NA	estimate	45.3782	45.5312	4.52177	38.5655	42.249	44.1775	46.5655	48.3772	53.3041
2021-10-03	infections	NA	estimate	48.5592	48.7583	4.81298	41.3186	45.3209	47.3375	49.8446	51.8467	57.0753
2021-10-04	infections	NA	estimate	51.9874	52.1975	5.11487	44.2953	48.593	50.6504	53.2585	55.4764	61.0903
2021-10-05	infections	NA	estimate	55.6552	55.8534	5.42219	47.6624	52.0671	54.2346	56.9334	59.3527	65.4554
2021-10-06	infections	NA	estimate	59.511	59.7232	5.73296	50.9085	55.739	58.0371	60.8689	63.4222	69.9407
2021-10-07	infections	NA	estimate	63.428	63.7949	6.04995	54.3699	59.5245	62.078	64.988	67.5659	74.6978
2021-10-08	infections	NA	estimate	67.6639	68.0461	6.37942	58.145	63.7233	66.1449	69.2868	71.992	79.2443
2021-10-09	infections	NA	estimate	72.0643	72.4446	6.72787	62.1686	67.8262	70.3902	73.8582	76.5873	84.2148
2021-10-10	infections	NA	estimate	76.6122	76.9506	7.09883	66.0206	72.0672	74.85	78.3432	81.4102	89.2129
2021-10-11	infections	NA	estimate	81.1538	81.5196	7.49151	69.9155	76.3393	79.4187	83.0405	86.1707	94.3311
2021-10-12	infections	NA	estimate	85.6904	86.108	7.90087	74.0329	80.7713	83.7863	87.6847	91.1079	99.5984
2021-10-13	infections	NA	estimate	90.2419	90.6775	8.31787	77.8401	85.0706	88.2145	92.3406	95.9269	104.86
2021-10-14	infections	NA	estimate	94.8036	95.2	8.73015	81.6905	89.236	92.5998	96.8946	100.67	110.058
2021-10-15	infections	NA	estimate	99.2093	99.6608	9.12481	85.4459	93.4834	97.0058	101.343	105.623	115.361
2021-10-16	infections	NA	estimate	103.47	104.06	9.49286	89.4658	97.5857	101.233	105.817	110.132	120.423
2021-10-17	infections	NA	estimate	107.868	108.411	9.83268	93.418	101.652	105.547	110.316	114.631	125.262
2021-10-18	infections	NA	estimate	112.228	112.739	10.1512	97.078	105.617	109.746	114.736	119.192	130.158
2021-10-19	infections	NA	estimate	116.524	117.074	10.4627	100.957	109.804	113.933	119.303	123.639	135.066
2021-10-20	infections	NA	estimate	120.946	121.447	10.7868	104.746	114.016	118.224	123.754	128.296	139.594
2021-10-21	infections	NA	estimate	125.401	125.882	11.1432	108.269	118.331	122.75	128.314	133.131	144.515
2021-10-22	infections	NA	estimate	129.885	130.397	11.5462	112.061	122.69	127.25	132.974	137.816	149.704
2021-10-23	infections	NA	estimate	134.665	134.993	11.9995	115.805	126.85	131.658	137.742	142.787	154.909
2021-10-24	infections	NA	estimate	139.387	139.661	12.4947	119.751	131.089	136.213	142.418	147.623	160.823
2021-10-25	infections	NA	estimate	144.014	144.376	13.0131	123.889	135.538	140.647	147.223	152.658	166.338
2021-10-26	infections	NA	estimate	148.384	149.107	13.5285	127.939	139.837	145.258	151.87	157.438	172.452
2021-10-27	infections	NA	estimate	153.061	153.812	14.011	132.322	144.087	149.796	156.666	162.511	178.518
2021-10-28	infections	NA	estimate	157.868	158.451	14.4338	136.053	148.568	154.176	161.102	167.245	184.093
2021-10-29	infections	NA	estimate	162.304	162.983	14.7808	140.197	152.666	158.582	165.982	172.001	189.008
2021-10-30	infections	NA	estimate	166.777	167.377	15.054	144.162	157.016	163.04	170.354	176.512	193.665
2021-10-31	infections	NA	estimate	171.08	171.608	15.2763	148.017	161.036	167.219	174.705	181.144	197.885
2021-11-01	infections	NA	estimate	175.006	175.662	15.4854	151.391	165.057	171.343	178.698	185.432	201.728
2021-11-02	infections	NA	estimate	178.99	179.527	15.7181	155.245	168.792	174.856	182.831	189.452	206.539
2021-11-03	infections	NA	estimate	182.467	183.191	15.9931	158.478	172.1	178.719	186.679	193.392	210.709
2021-11-04	infections	NA	estimate	185.883	186.635	16.3018	161.371	175.319	181.938	190.254	196.889	214.927
2021-11-05	infections	NA	estimate	189.16	189.824	16.6163	164.168	178.335	185.217	193.469	200.299	218.513
2021-11-06	infections	NA	estimate	192.04	192.702	16.9087	166.254	181.277	187.882	196.037	203.191	221.485
2021-11-07	infections	NA	estimate	194.373	195.194	17.1676	168.003	183.65	190.436	198.598	206.118	224.515
2021-11-08	infections	NA	estimate	196.304	197.199	17.3981	169.967	185.584	192.431	200.461	208.306	227.002
2021-11-09	infections	NA	estimate	197.604	198.597	17.6056	170.902	186.675	193.76	201.781	209.659	228.832
2021-11-10	infections	NA	estimate	198.158	199.251	17.7768	171.694	187.151	194.194	202.61	210.193	229.624
2021-11-11	infections	NA	estimate	197.843	199.023	17.8721	171.758	186.674	193.668	202.271	210.186	230.339
2021-11-12	infections	NA	estimate	196.775	197.782	17.8369	170.626	185.289	192.236	201.162	208.678	229.707
2021-11-13	infections	NA	estimate	194.27	195.435	17.6228	169.002	183.035	189.938	198.645	206.443	226.458
2021-11-14	infections	NA	estimate	191.088	191.933	17.2093	166.099	179.437	186.666	195.207	202.699	221.509
2021-11-15	infections	NA	estimate	186.277	187.298	16.6163	162.315	175.569	182.36	190.502	197.619	215.491
2021-11-16	infections	NA	estimate	180.721	181.619	15.9038	157.708	170.501	176.713	184.826	191.793	209.259
2021-11-17	infections	NA	estimate	174.196	175.05	15.1553	152.045	164.432	170.472	177.992	185.033	201.254
2021-11-18	infections	NA	estimate	167.045	167.797	14.4525	145.057	157.609	163.57	170.786	177.002	192.426
2021-11-19	infections	NA	estimate	159.481	160.094	13.848	138.224	150.25	156.152	162.897	168.982	184.095
2021-11-20	infections	NA	estimate	151.482	152.179	13.3502	130.956	142.986	148.295	154.814	160.7	175.267
2021-11-21	infections	NA	estimate	143.83	144.274	12.9289	123.579	135.476	140.321	146.915	152.823	166.364
2021-11-22	infections	NA	estimate	136.172	136.57	12.5369	116.577	128.055	133.054	139.408	144.591	158.09
2021-11-23	infections	NA	estimate	129.004	129.216	12.1319	110.212	120.905	125.831	132.097	136.883	149.637
2021-11-24	infections	NA	estimate	122.052	122.316	11.6895	103.936	114.435	119.077	124.972	129.874	141.77
2021-11-25	infections	NA	estimate	115.54	115.928	11.2049	97.939	108.386	112.695	118.423	123.262	134.703
2021-11-26	infections	NA	estimate	109.702	110.074	10.6896	93.0169	102.936	107.08	112.447	116.949	128.239
2021-11-27	infections	NA	estimate	104.409	104.742	10.1662	88.6598	98.0483	101.899	106.856	111.416	121.868
2021-11-28	infections	NA	estimate	99.5065	99.894	9.66235	84.524	93.4151	97.2285	101.936	106.385	116.071
2021-11-29	infections	NA	estimate	95.0517	95.4758	9.20308	80.6643	89.3042	92.884	97.3946	101.698	110.863
2021-11-30	infections	NA	estimate	91.0454	91.4225	8.80408	77.2088	85.4871	88.9407	93.1114	97.2646	106.122
2021-12-01	infections	NA	estimate	87.3358	87.6659	8.46686	74.1164	81.8132	85.3797	89.3956	93.157	102.228
2021-12-02	infections	NA	estimate	83.7883	84.1401	8.17814	71.1102	78.5207	81.8813	85.7654	89.3553	98.136
2021-12-03	infections	NA	estimate	80.3206	80.788	7.91459	68.4615	75.3403	78.5645	82.3617	85.8287	94.5839
2021-12-04	infections	NA	estimate	77.1646	77.5647	7.65167	65.797	72.3088	75.2689	79.0569	82.3657	90.8602
2021-12-05	infections	NA	estimate	74.0847	74.4415	7.37323	63.0558	69.3081	72.2168	75.874	78.9889	87.2876
2021-12-06	infections	NA	estimate	71.1418	71.4063	7.07761	60.6045	66.3931	69.3168	72.7081	75.7436	83.6015
2021-12-07	infections	NA	estimate	68.0873	68.4616	6.77762	58.1138	63.615	66.5203	69.7281	72.7298	79.9808
2021-12-08	infections	NA	estimate	65.2933	65.6214	6.49413	55.7181	61.0726	63.7591	66.8861	69.6692	76.7839
2021-12-09	infections	NA	estimate	62.6166	62.9052	6.24565	53.33	58.5493	61.0349	64.144	66.8885	73.69
2021-12-10	infections	NA	estimate	60.1145	60.333	6.039	50.9924	56.1759	58.504	61.6209	64.2202	70.6792
2021-12-11	infections	NA	estimate	57.6477	57.9212	5.86624	48.8225	53.8959	56.2226	59.2521	61.6889	68.0564
2021-12-12	infections	NA	estimate	55.4627	55.6799	5.70977	46.5716	51.8572	54.0344	56.9275	59.3103	65.5041
2021-12-13	infections	NA	estimate	53.3552	53.6116	5.55174	44.621	49.9305	52.0118	54.8421	57.1107	63.0598
2021-12-14	infections	NA	estimate	51.4967	51.7115	5.38199	42.9918	48.1222	50.2248	52.8348	55.1345	60.9676
2021-12-15	infections	NA	estimate	49.7837	49.9677	5.20074	41.5729	46.4928	48.5999	51.0575	53.3101	59.074
2021-12-16	infections	NA	estimate	48.1609	48.3625	5.01599	40.34	45.0294	46.9439	49.4883	51.6017	57.1274
2021-12-17	infections	NA	estimate	46.6267	46.8732	4.83809	39.3836	43.5326	45.5253	47.9693	50.0152	55.2435
2021-12-18	infections	NA	estimate	45.2086	45.4735	4.67468	38.2156	42.2288	44.1049	46.5231	48.505	53.4078
2021-12-19	infections	NA	estimate	43.904	44.1357	4.52832	37.1291	40.9759	42.8428	45.0531	47.0714	51.6497
2021-12-20	infections	NA	estimate	42.5928	42.8326	4.39736	35.9484	39.7258	41.6065	43.7341	45.661	50.1912
2021-12-21	infections	NA	estimate	41.31	41.5401	4.27834	34.8098	38.5787	40.3227	42.3983	44.2327	48.7033
2021-12-22	infections	NA	estimate	40.0404	40.239	4.16779	33.7186	37.298	39.0409	41.0837	42.817	47.3427
2021-12-23	infections	NA	estimate	38.7188	38.9167	4.06228	32.6316	36.0776	37.7135	39.7663	41.3727	45.9921
2021-12-24	infections	NA	estimate	37.309	37.5676	3.95777	31.4827	34.7802	36.3579	38.3257	40.0788	44.4916
2021-12-25	infections	NA	estimate	35.8574	36.1933	3.84953	30.3118	33.4804	34.9886	36.9439	38.6021	42.9216
2021-12-26	infections	NA	estimate	34.5836	34.8019	3.73362	29.0718	32.1505	33.616	35.4585	37.1455	41.2954
2021-12-27	infections	NA	estimate	33.2041	33.4068	3.60941	27.9062	30.8798	32.2737	34.0468	35.6378	39.6574
2021-12-28	infections	NA	estimate	31.807	32.026	3.48177	26.7345	29.6019	30.9337	32.6811	34.2305	37.9545
2021-12-29	infections	NA	estimate	30.4637	30.6798	3.36129	25.5103	28.3367	29.6577	31.3216	32.8198	36.342
2021-12-30	infections	NA	estimate	29.2218	29.389	3.26104	24.3695	27.1195	28.4022	29.9956	31.4901	34.9626
2021-12-31	infections	NA	estimate	28.0486	28.1737	3.1908	23.1812	25.9548	27.243	28.7757	30.2006	33.5849
2022-01-01	infections	NA	estimate	26.9207	27.0512	3.15222	22.0585	24.8762	26.119	27.6965	29.0661	32.5488
2022-01-02	infections	NA	estimate	25.907	26.036	3.13869	21.0829	23.8358	25.1374	26.7748	28.0706	31.4898
2022-01-03	infections	NA	estimate	25.0218	25.1394	3.1391	20.2339	22.9269	24.2359	25.8596	27.1932	30.5116
2022-01-04	infections	NA	estimate	24.2489	24.3703	3.14302	19.3977	22.1821	23.4807	25.1022	26.413	29.7204
2022-01-05	infections	NA	estimate	23.5864	23.7362	3.14527	18.7559	21.5768	22.8559	24.4389	25.7718	29.0157
2022-01-06	infections	NA	estimate	23.1232	23.2446	3.15087	18.301	21.1002	22.3747	23.8814	25.2427	28.5924
2022-01-07	infections	NA	estimate	22.7842	22.9044	3.181	17.9233	20.7297	22.0311	23.5547	24.8361	28.423
2022-01-08	infections	NA	estimate	22.552	22.7284	3.28026	17.5915	20.5146	21.769	23.3398	24.6975	28.487
2022-01-09	infections	NA	estimate	22.4949	22.7356	3.5224	17.2567	20.3023	21.6343	23.3246	24.8561	28.99
2022-01-10	infections	NA	estimate based on partial data	22.675	22.9558	4.00989	16.94	20.1367	21.6821	23.6201	25.3773	30.1293
2022-01-11	infections	NA	estimate based on partial data	23.0241	23.4353	4.86831	16.2747	19.9361	21.8369	24.295	26.4672	31.9897
2022-01-12	infections	NA	estimate based on partial data	23.5729	24.247	6.25367	15.0882	19.7696	22.0899	25.2199	28.2056	35.1174
2022-01-13	infections	NA	estimate based on partial data	24.2412	25.5068	8.39706	13.9248	19.3593	22.3409	26.4649	30.4095	40.8742
2022-01-14	infections	NA	estimate based on partial data	25.0253	27.4019	11.7124	12.6777	19.0289	22.4829	27.959	33.5551	49.715
2022-01-15	infections	NA	estimate based on partial data	25.7452	30.2486	17.0412	11.3299	18.5932	22.7861	29.8207	37.3693	62.4957
2022-01-16	infections	NA	estimate based on partial data	26.9208	34.6136	26.2708	9.98654	18.0113	23.0902	31.9025	42.7174	82.1125
2022-01-17	infections	NA	estimate based on partial data	28.0061	41.5964	44.0923	8.72891	17.3509	23.4987	34.4529	49.3216	115.265
2022-01-18	infections	NA	estimate based on partial data	29.32	53.553	83.6256	7.54424	16.5788	23.7587	37.8031	58.0309	169.497
2021-08-17	reported_cases	NA	estimate	15	15.7048	6.3441	7	11	13	16	19	27
2021-08-18	reported_cases	NA	estimate	18	19.1487	7.80778	9	14	16	20	23	33
2021-08-19	reported_cases	NA	estimate	20	21.7965	9.14267	10	15	18	23	26	39
2021-08-20	reported_cases	NA	estimate	24	25.614	10.253	12	18	22	27	31	45
2021-08-21	reported_cases	NA	estimate	30	31.7605	11.3103	16	24	28	33	38	53.05
2021-08-22	reported_cases	NA	estimate	34	35.766	11.466	20	28	32	37	42	57
2021-08-23	reported_cases	NA	estimate	34	34.6625	10.7714	19	27	31	36	41	53
2021-08-24	reported_cases	NA	estimate	49	50.6403	14.7564	29	40	46	53	59	77
2021-08-25	reported_cases	NA	estimate	57	57.6675	17.2533	32	45	52	61	68	88
2021-08-26	reported_cases	NA	estimate	56	58.0613	17.3819	33	46	52	61	69	89
2021-08-27	reported_cases	NA	estimate	57	57.9237	17.4359	32	46	52	61	69	89
2021-08-28	reported_cases	NA	estimate	57	58.7963	17.395	33	46	53	62	70	90
2021-08-29	reported_cases	NA	estimate	52	52.899	15.772	29	42	48	56	63	79
2021-08-30	reported_cases	NA	estimate	40	41.397	12.4791	23	33	38	44	49	63
2021-08-31	reported_cases	NA	estimate	48	49.1352	14.3649	27	39	45	52	58	75
2021-09-01	reported_cases	NA	estimate	46	46.938	13.8632	26	37	42	49	55	72
2021-09-02	reported_cases	NA	estimate	40	40.8813	12.3222	23	32	37	43	48	62
2021-09-03	reported_cases	NA	estimate	36	36.6175	11.224	20	29	33	38	43	56
2021-09-04	reported_cases	NA	estimate	32	33.3935	10.2645	18	26	30	35	40	52
2021-09-05	reported_cases	NA	estimate	27	28.4642	9.19088	15	22	25	30	34	45
2021-09-06	reported_cases	NA	estimate	21	21.4937	7.2738	11	16	19	22.4	26	35
2021-09-07	reported_cases	NA	estimate	24	24.881	8.4548	13	19	22	26	30	40
2021-09-08	reported_cases	NA	estimate	23	23.6032	8.155	12	18	21	25	28	38
2021-09-09	reported_cases	NA	estimate	20	20.9142	7.13566	11	16	18	22	25	34
2021-09-10	reported_cases	NA	estimate	18	19.1842	6.74901	10	14	17	20	23	32
2021-09-11	reported_cases	NA	estimate	18	18.693	6.61749	9	14	16	20	23	30
2021-09-12	reported_cases	NA	estimate	16	16.808	6.14163	8	12	15	18	21	28
2021-09-13	reported_cases	NA	estimate	13	13.6095	5.13664	6	10	12	14	17	23
2021-09-14	reported_cases	NA	estimate	16	16.8665	6.10725	8	12	15	18	21	28
2021-09-15	reported_cases	NA	estimate	17	17.4857	6.20834	9	13	15	18	21	29
2021-09-16	reported_cases	NA	estimate	16	16.5068	5.98677	8	12	14	18	20	27
2021-09-17	reported_cases	NA	estimate	16	16.1457	5.80572	8	12	14	17	20	26
2021-09-18	reported_cases	NA	estimate	16	16.477	5.9728	8	12	14	17	20	27
2021-09-19	reported_cases	NA	estimate	15	15.8323	5.80147	8	12	14	17	19	26
2021-09-20	reported_cases	NA	estimate	13	13.2825	5.09703	6	10	12	14	16	22
2021-09-21	reported_cases	NA	estimate	17	17.3083	6.0187	9	13	15	18	21	28
2021-09-22	reported_cases	NA	estimate	18	18.5057	6.35689	9	14	16	19	22	30
2021-09-23	reported_cases	NA	estimate	17	18.042	6.30001	9	14	16	19	22	29
2021-09-24	reported_cases	NA	estimate	18	18.5048	6.4834	9	14	16	19	22	30
2021-09-25	reported_cases	NA	estimate	19	19.5727	6.57575	10	15	17	21	24	31
2021-09-26	reported_cases	NA	estimate	19	19.1163	6.67685	9	14	17	20	23	31
2021-09-27	reported_cases	NA	estimate	16	16.6258	5.90435	8	12	15	18	20	27
2021-09-28	reported_cases	NA	estimate	22	22.2125	7.40328	11	17	20	23	27	36
2021-09-29	reported_cases	NA	estimate	24	24.4208	8.03442	13	19	22	26	29	39
2021-09-30	reported_cases	NA	estimate	24	24.6715	7.98348	13	19	22	26	29	39
2021-10-01	reported_cases	NA	estimate	25	26.002	8.30583	14	20	23	27	31	41
2021-10-02	reported_cases	NA	estimate	28	28.2928	8.95375	15	22	25	30	33	44
2021-10-03	reported_cases	NA	estimate	28	28.4393	8.98048	15	22	25	30	34	45
2021-10-04	reported_cases	NA	estimate	25	25.264	8.18856	13	19.75	22	27	30	40
2021-10-05	reported_cases	NA	estimate	33	34.1465	10.5076	19	27	31	36	41	52
2021-10-06	reported_cases	NA	estimate	37	38.055	11.4593	21	30	34	40	45	58
2021-10-07	reported_cases	NA	estimate	38	39.0418	11.8978	22	30	35	41	46	60
2021-10-08	reported_cases	NA	estimate	40	41.3715	12.149	23	33	37	44	49	63
2021-10-09	reported_cases	NA	estimate	44	45.0705	13.1636	26	36	40.6	47	53	68
2021-10-10	reported_cases	NA	estimate	45	45.9095	13.3745	26	36	41	48	54	70
2021-10-11	reported_cases	NA	estimate	39	40.4625	12.0579	22	32	36	42	48	62
2021-10-12	reported_cases	NA	estimate	53	55.0637	16.1438	32	44	50	58	65	84
2021-10-13	reported_cases	NA	estimate	59.5	61.2478	17.3247	36	49	56	64	72	92
2021-10-14	reported_cases	NA	estimate	61	62.4123	17.2235	37	50	57	66	73	92
2021-10-15	reported_cases	NA	estimate	64	65.6202	18.5747	38.95	53	59	68	77	99
2021-10-16	reported_cases	NA	estimate	69	71.2138	19.9426	42	57	65	75	84	107
2021-10-17	reported_cases	NA	estimate	69	71.1685	19.7532	42	57	65	74	83	107
2021-10-18	reported_cases	NA	estimate	61	62.3485	17.4827	36	50	57	65	73	93
2021-10-19	reported_cases	NA	estimate	83	84.401	23.2593	49.95	68	77	88	99	125
2021-10-20	reported_cases	NA	estimate	90	91.648	24.4463	55	74	84	96	107	135
2021-10-21	reported_cases	NA	estimate	91	93.3328	25.595	56	75	85	97.4	109	138
2021-10-22	reported_cases	NA	estimate	94.5	96.8898	26.2517	58	79	89	101.4	112	144
2021-10-23	reported_cases	NA	estimate	101	103.325	28.1942	62	84	94	108	120	154
2021-10-24	reported_cases	NA	estimate	98	100.909	27.825	60	81	91.6	106	118	152
2021-10-25	reported_cases	NA	estimate	85	87.4838	24.1367	52	71	79	91	102	131
2021-10-26	reported_cases	NA	estimate	113	115.878	31.804	70	94	106	120	134.25	172
2021-10-27	reported_cases	NA	estimate	123	125.133	33.0154	76	102	115	131	145	185
2021-10-28	reported_cases	NA	estimate	121	123.876	32.6201	75	101	113	130	143	182
2021-10-29	reported_cases	NA	estimate	124.5	127.712	34.2308	79	104	116	132	148	189
2021-10-30	reported_cases	NA	estimate	132	135.001	36.1753	82	110	124	140	157	198
2021-10-31	reported_cases	NA	estimate	128	131.814	35.1045	81	107	120	138	153	194.05
2021-11-01	reported_cases	NA	estimate	110	112.861	30.2317	68	92	103	119	131	166
2021-11-02	reported_cases	NA	estimate	145	148.98	39.4054	91	122	136	155	171.25	221.05
2021-11-03	reported_cases	NA	estimate	155	159.37	42.4352	98	130	145	166	185	236
2021-11-04	reported_cases	NA	estimate	155	157.908	41.79	96	129	144	164	183	231
2021-11-05	reported_cases	NA	estimate	157.5	161.11	43.0876	98	130	147	169	187	236
2021-11-06	reported_cases	NA	estimate	163	167.262	45.2223	102	137	153	174	193	247
2021-11-07	reported_cases	NA	estimate	159	162.061	41.3149	101	133.75	148	168	187	236
2021-11-08	reported_cases	NA	estimate	134	137.89	37.0892	84	112	126	143	161	202
2021-11-09	reported_cases	NA	estimate	177	180.814	47.7972	111	147	165	188	209	266
2021-11-10	reported_cases	NA	estimate	185	189.334	49.6915	117	154	172	198	219	279
2021-11-11	reported_cases	NA	estimate	182	186.514	47.8482	117	152	171	194	216	272
2021-11-12	reported_cases	NA	estimate	182	186.655	49.2071	116	153	171	194	216	275
2021-11-13	reported_cases	NA	estimate	191	195.237	50.4091	122	160	179	204	225	284
2021-11-14	reported_cases	NA	estimate	181	185.575	47.3293	114	152	171	193	214	270
2021-11-15	reported_cases	NA	estimate	152	154.966	40.2473	95	126	141	162	180	224
2021-11-16	reported_cases	NA	estimate	195	199.344	52.105	122	163	183	208	231	291
2021-11-17	reported_cases	NA	estimate	204	208.989	54.8917	128	170	190	218	243	309
2021-11-18	reported_cases	NA	estimate	195	199.901	51.1585	125	164	183	208	231	293
2021-11-19	reported_cases	NA	estimate	191	195.821	51.1769	121	160	178	203	226	290
2021-11-20	reported_cases	NA	estimate	195	199.862	52.0884	123	163	183	208	232	293
2021-11-21	reported_cases	NA	estimate	180	184.679	47.7729	116	150	168	192	214	270
2021-11-22	reported_cases	NA	estimate	146	149.222	38.528	92	122	136	157	173	217
2021-11-23	reported_cases	NA	estimate	183	187.153	49.515	113	153	172	195	217	275.05
2021-11-24	reported_cases	NA	estimate	186	189.599	48.5166	117	155	174	198	219	274
2021-11-25	reported_cases	NA	estimate	173	175.854	46.6613	106	143	162	184	203.25	259
2021-11-26	reported_cases	NA	estimate	163	167.348	43.3661	103	138	153	174	193	246.05
2021-11-27	reported_cases	NA	estimate	161	164.142	42.7621	100	134	150	171	190	240
2021-11-28	reported_cases	NA	estimate	145	148.214	38.9376	91	121	135	155	172	217
2021-11-29	reported_cases	NA	estimate	114	116.676	31.5948	69	95	106	121	136	173
2021-11-30	reported_cases	NA	estimate	140	143.234	38.1906	87	116	131	149	166	212
2021-12-01	reported_cases	NA	estimate	138	141.61	38.1564	86	114	129	148	165	208
2021-12-02	reported_cases	NA	estimate	126	129.025	33.7674	80	105	118	134.4	148	190
2021-12-03	reported_cases	NA	estimate	118	120.731	32.4925	73	98	110	125.4	140	178
2021-12-04	reported_cases	NA	estimate	116	118.313	31.167	72	96	108	123	137	174
2021-12-05	reported_cases	NA	estimate	104	105.971	28.4155	64	86	97	111	123	154
2021-12-06	reported_cases	NA	estimate	82	84.406	23.327	50	68	77	88	98	127
2021-12-07	reported_cases	NA	estimate	101	103.22	28.5386	61	83	93	108	121	154.05
2021-12-08	reported_cases	NA	estimate	100	102.441	27.6384	62	83	94	107	119	152
2021-12-09	reported_cases	NA	estimate	92	93.945	25.3664	57	76	86	98	109	138
2021-12-10	reported_cases	NA	estimate	87	88.7135	24.0585	53	72	81	92	104	131
2021-12-11	reported_cases	NA	estimate	85	87.2652	24.29	52	70	79	90	102	131
2021-12-12	reported_cases	NA	estimate	76	77.9922	21.644	45	63	71	82	92	116
2021-12-13	reported_cases	NA	estimate	60	62.0607	17.7014	36	50	56	65	73	94
2021-12-14	reported_cases	NA	estimate	75	76.4518	21.3975	45	61	69	80	90	114
2021-12-15	reported_cases	NA	estimate	75	76.5157	20.7144	46	62	70	80	89	113
2021-12-16	reported_cases	NA	estimate	68	69.8635	19.4757	41	56	63	73	82	104
2021-12-17	reported_cases	NA	estimate	65	66.49	18.4174	39	54	60	69	78	99
2021-12-18	reported_cases	NA	estimate	63	64.7785	18.1155	39	52	58	67	76	97
2021-12-19	reported_cases	NA	estimate	57	59.0685	17.0671	34	47	53	62	69	90
2021-12-20	reported_cases	NA	estimate	45	46.4108	13.4051	26	37	42	49	55	70
2021-12-21	reported_cases	NA	estimate	56	57.467	16.3759	33	46	52	60	67	86
2021-12-22	reported_cases	NA	estimate	56	57.239	15.9309	33	46	52	60	67	86
2021-12-23	reported_cases	NA	estimate	52	53.4477	15.3315	31	43	48	56	63	81
2021-12-24	reported_cases	NA	estimate	49	50.7278	14.4971	29	40.75	46	53	60	76
2021-12-25	reported_cases	NA	estimate	49	50.256	14.7315	28	40	45	53	59	77
2021-12-26	reported_cases	NA	estimate	45	46.0363	13.2347	26	37	42	48	54	69
2021-12-27	reported_cases	NA	estimate	36	36.8513	11.4465	20	29	33	39	44	57
2021-12-28	reported_cases	NA	estimate	44	45.4128	13.2299	26	36	41	48	54	68
2021-12-29	reported_cases	NA	estimate	45	46.0192	13.4993	26	36	41	48	54	70
2021-12-30	reported_cases	NA	estimate	41	42.398	12.4301	24	34	38	44	50	64
2021-12-31	reported_cases	NA	estimate	39	40.5388	12.0781	23	32	37	43	48	62
2022-01-01	reported_cases	NA	estimate	38	39.5635	12.0519	22	31	36	41	47	61
2022-01-02	reported_cases	NA	estimate	35	35.9168	10.8429	20	28	32	38	42	55
2022-01-03	reported_cases	NA	estimate	28	28.704	9.12114	15	22	26	30	34	45
2022-01-04	reported_cases	NA	estimate	34	35.3195	10.6746	19	28	32	37	42	54
2022-01-05	reported_cases	NA	estimate	34	34.9053	10.3968	20	28	31	37	41	54
2022-01-06	reported_cases	NA	estimate	32	32.577	10.1534	18	25	29	34	39	50
2022-01-07	reported_cases	NA	estimate	30	30.7987	9.65254	17	24	28	32	37	48
2022-01-08	reported_cases	NA	estimate	29	29.9533	9.44629	16	23	27	31	35	47
2022-01-09	reported_cases	NA	estimate	26	27.1807	8.54642	15	21	24	28	32	42
2022-01-10	reported_cases	NA	estimate based on partial data	21	21.877	7.13426	11	17	20	23	26	35
2022-01-11	reported_cases	NA	estimate based on partial data	26	27.0865	8.80616	14	21	24	28	32	43
2022-01-12	reported_cases	NA	estimate based on partial data	27	27.373	8.83835	14	21	24	29	33	43
2022-01-13	reported_cases	NA	estimate based on partial data	25	25.773	8.54642	13	20	23	27	31	41
2022-01-14	reported_cases	NA	estimate based on partial data	24	25.0485	7.97004	13	19	22	26	30	39
2022-01-15	reported_cases	NA	estimate based on partial data	24	25.1363	8.24965	13	19	22	26	30	40
2022-01-16	reported_cases	NA	estimate based on partial data	23	23.8287	8.04019	12	18	21	25	29	38
2022-01-17	reported_cases	NA	estimate based on partial data	19	19.7425	7.19073	9	15	17	21	24	33
2022-01-18	reported_cases	NA	estimate based on partial data	25	25.7225	9.26107	13	19	23	27	31	42
NA	day_of_week	Friday	NA	1.01995	1.02031	0.0552009	0.931672	0.98345	1.00417	1.03361	1.05677	1.11164
NA	day_of_week	Monday	NA	0.811071	0.812292	0.0457114	0.73858	0.780608	0.799634	0.822012	0.842333	0.889941
NA	day_of_week	Saturday	NA	1.04011	1.04111	0.0571326	0.949732	1.00178	1.02578	1.05408	1.07829	1.13846
NA	day_of_week	Sunday	NA	0.976514	0.979108	0.0536632	0.8935	0.943637	0.964808	0.990056	1.01418	1.07071
NA	day_of_week	Thursday	NA	1.03347	1.03442	0.0566809	0.944569	0.996742	1.01977	1.04703	1.07071	1.12723
NA	day_of_week	Tuesday	NA	1.03579	1.03698	0.0556367	0.947821	0.996925	1.02046	1.05117	1.07533	1.13188
NA	day_of_week	Wednesday	NA	1.07529	1.07578	0.0570647	0.98191	1.03856	1.06087	1.08899	1.11272	1.16999
NA	delay_mean	1	NA	1.62105	1.621	0.0050946	1.61264	1.6175	1.61964	1.62225	1.62442	1.62944
NA	delay_mean	2	NA	0.988072	0.988062	0.00668285	0.976782	0.98357	0.9863	0.989879	0.992664	0.999166
NA	delay_sd	1	NA	0.417858	0.417817	0.0054951	0.408836	0.413975	0.416365	0.419218	0.421652	0.426791
NA	delay_sd	2	NA	0.846915	0.846893	0.00490007	0.83899	0.843415	0.845641	0.848226	0.850272	0.854843
NA	gt_mean	NA	NA	4.60062	4.6007	0.0330241	4.54609	4.57885	4.59207	4.60901	4.62326	4.65481
NA	gt_sd	NA	NA	3.10064	3.10044	0.0160362	3.07384	3.08952	3.09627	3.10498	3.11162	3.12581
NA	reporting_overdispersion	NA	NA	0.00271281	0.00312127	0.00169454	0.00118374	0.00191743	0.00238436	0.00312803	0.00388038	0.00650519
